# Supplementary material
Source: MDPI journal article supplement (https://www.mdpi.com/2073-4344/11/11/1294)
Supplement: s1 [file s1]

Supplementary

# Synthesis of 14-Substituted-14H-Dibenzo[*a,j*]Xanthene Derivatives in Presence of Effective Synergetic Catalytic System Bleaching Earth Clay and PEG-600

Sandeep T. Atkore <sup>1,\*</sup>, Giribala M. Bondle <sup>2</sup>, Pranita V. Raithak <sup>3</sup>, Vinod T. Kamble <sup>4</sup>, Ravi Varala <sup>5</sup>,  
Muhsir Kuniyil <sup>6</sup>, Mohammad Rafe Hatshan <sup>6</sup>, Baji Shaik <sup>7</sup>, Syed Farooq Adil <sup>6,\*</sup> and Mohammed Althaf Hussain <sup>8</sup>

<sup>1</sup> Department of Biochemistry, Dr. Babasaheb Ambedkar Marathwada University, Aurangabad 431004, Maharashtra, India

<sup>2</sup> Department of Chemistry, Dr. Babasaheb Ambedkar Marathwada University, Aurangabad 431004, Maharashtra, India; giribalamb@gmail.com

<sup>3</sup> Department of Botany, Dr. Babasaheb Ambedkar Marathwada University, Aurangabad 431004, Maharashtra, India; pvrathak@yahoo.com

<sup>4</sup> Department of Chemistry, Government Institute of Science, Mumbai 400032, Maharashtra, India; vtgd@rediffmail.com

<sup>5</sup> Sips Pharma, Mallapur, Hyderabad 50076, Telangana, India; ravivarala@gmail.com

<sup>6</sup> Department of Chemistry, College of Science, King Saud University, P.O. Box 2455, Riyadh 11451, Saudi Arabia; mkuniyil@ksu.edu.sa (M.K.); mhatshan@ksu.edu.sa (M.R.H.)

<sup>7</sup> Department of Advanced Materials Engineering for Information & Electronics, Kyung Hee University, 1732 Deogyong-daero, Giheung-gu, Yongin-si 446-701, Gyeonggi-do, Korea; shaikbaji2@khu.ac.kr

<sup>8</sup> Research Institute for the Creation of Functional and Structural Materials, Fukuoka University, 8-19-1 Nanakuma, Jonan-ku, Fukuoka 814-0180, Japan; althaf.mh7@gmail.com

\* Correspondence: statkore0@gmail.com (S.T.A.); sfadil@ksu.edu.sa (S.F.A.)

## 1. Antibacterial Activity

The antibacterial activities of the synthesized compounds were determined by the agar well diffusion method. The compounds were evaluated for antibacterial activity against *Staphylococcus aureus* (MTCC 96) and *Pseudomonas aeruginosa* (Wild). The culture strains of bacteria were maintained on a nutrient agar slant at 37±0.5 °C for 24 h. The antibacterial activity was evaluated using nutrient agar plates seeded separately with 0.1 mL of each bacterial culture strain suspension prepared in sterile saline (0.85%) of 105 CFU/mL dilutions. Wells of 6 mm diameter were filled with 0.1 mL of compound solution at a fixed concentration of 25 µg/mL, separately for each bacterial strain. All the plates were incubated at 37±0.5 °C for 24 h. The zone of inhibition of compounds in mm were noted. The results of in vitro antibacterial activities of compounds (3a–j) against bacterial strains are summarized in Table S1.

**Table S1.** Antibacterial activity of synthesized 14-substituted 14*H*-benzo[*a*,*j*] xanthene derivatives.

| Entry   | Product               | Name of the test organism                     |                                      |
|---------|-----------------------|-----------------------------------------------|--------------------------------------|
|         |                       | <i>Staphylococcus aureus</i> (MTCC 96)        | <i>Pseudomonas aeruginosa</i> (Wild) |
|         |                       | Zone of inhibition (mm) of Std. drugs (25 µg) |                                      |
| 3a      | 4-chlorophenyl        | 1.50                                          | 1.20                                 |
| 3b      | 4-nitrophenyl         | 1.70                                          | 1.40                                 |
| 3c      | 3-nitrophenyl         | 1.90                                          | 2.00                                 |
| 3d      | 3-fluorophenyl        | 4.25                                          | 5.70                                 |
| 3e      | 2,4-dichlorophenyl    | 1.01                                          | 1.20                                 |
| 3f      | phenyl                | 2.03                                          | 2.70                                 |
| 3g      | 4-methoxyphenyl       | 1.80                                          | 2.20                                 |
| 3h      | 4-methylphenyl        | 3.01                                          | 4.60                                 |
| 3i      | 4-dimethylaminophenyl | 4.00                                          | 3.09                                 |
| 3j      | ethyl                 | 3.80                                          | 3.92                                 |
| Control | <i>Streptomycin</i>   | 34.5                                          | 19.5                                 |

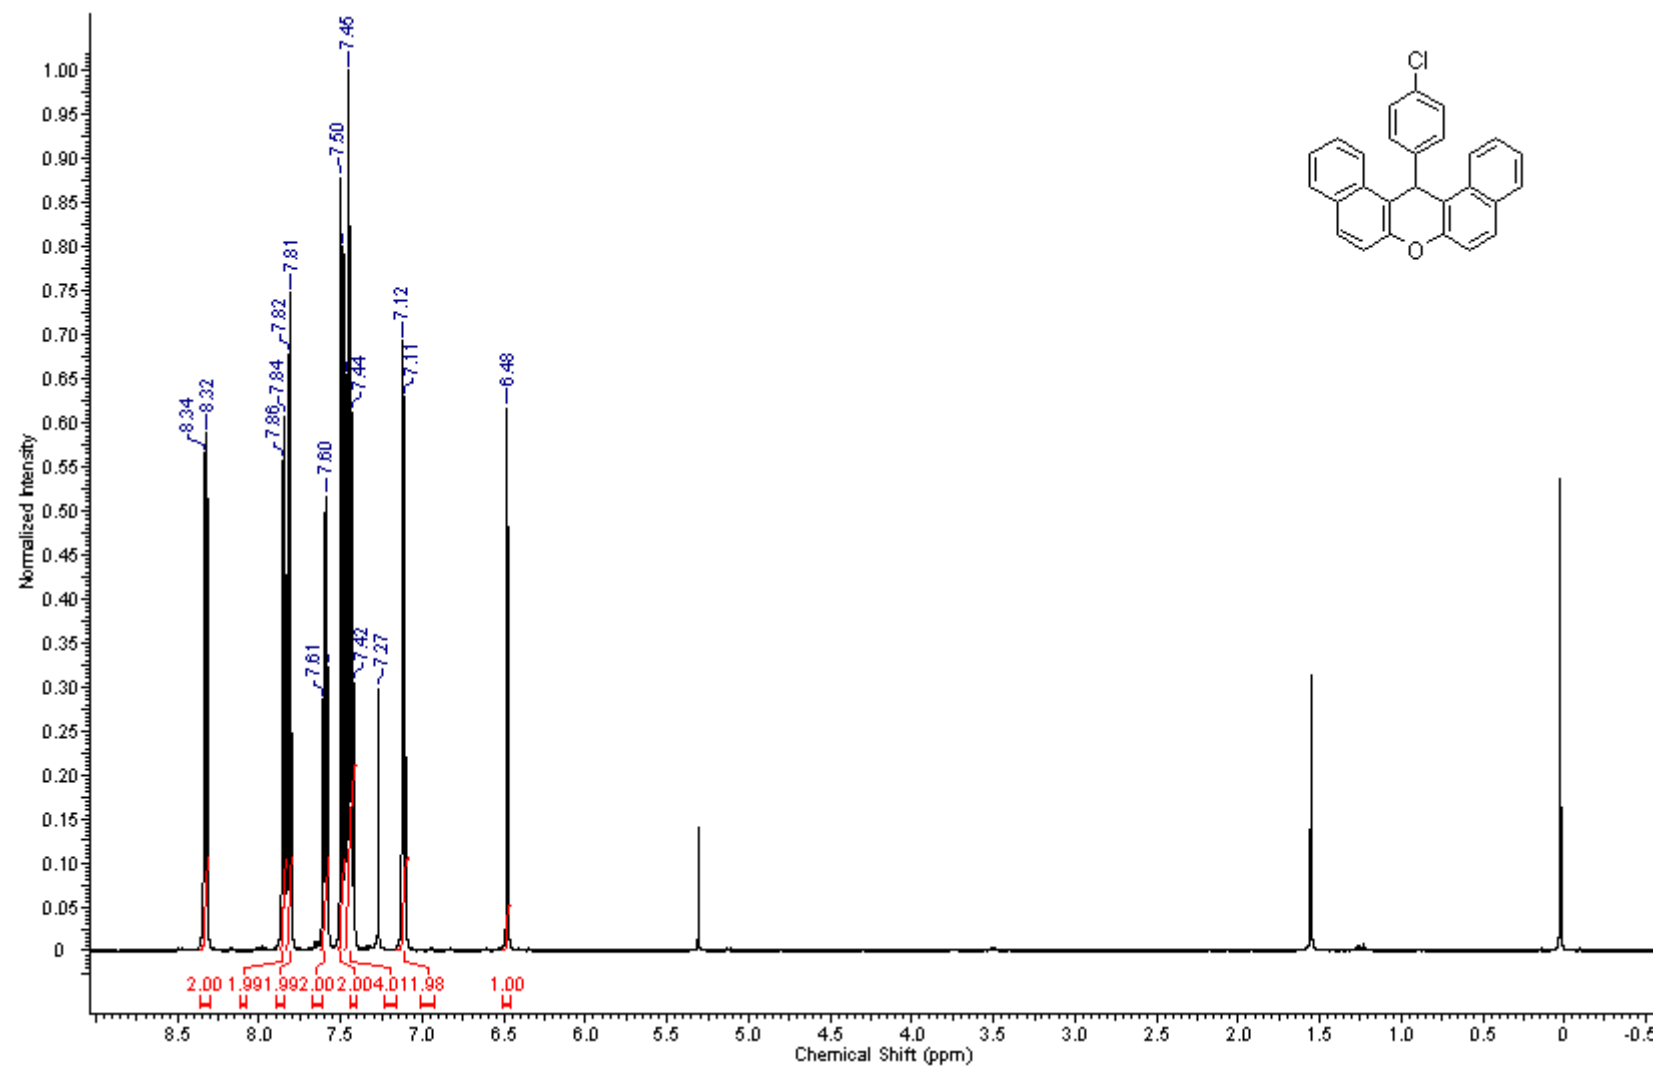

Figure S1.  $^1\text{H}$  NMR of compound 14-(4-chlorophenyl)-14H-dibenzo[a,j]xanthene 3a.

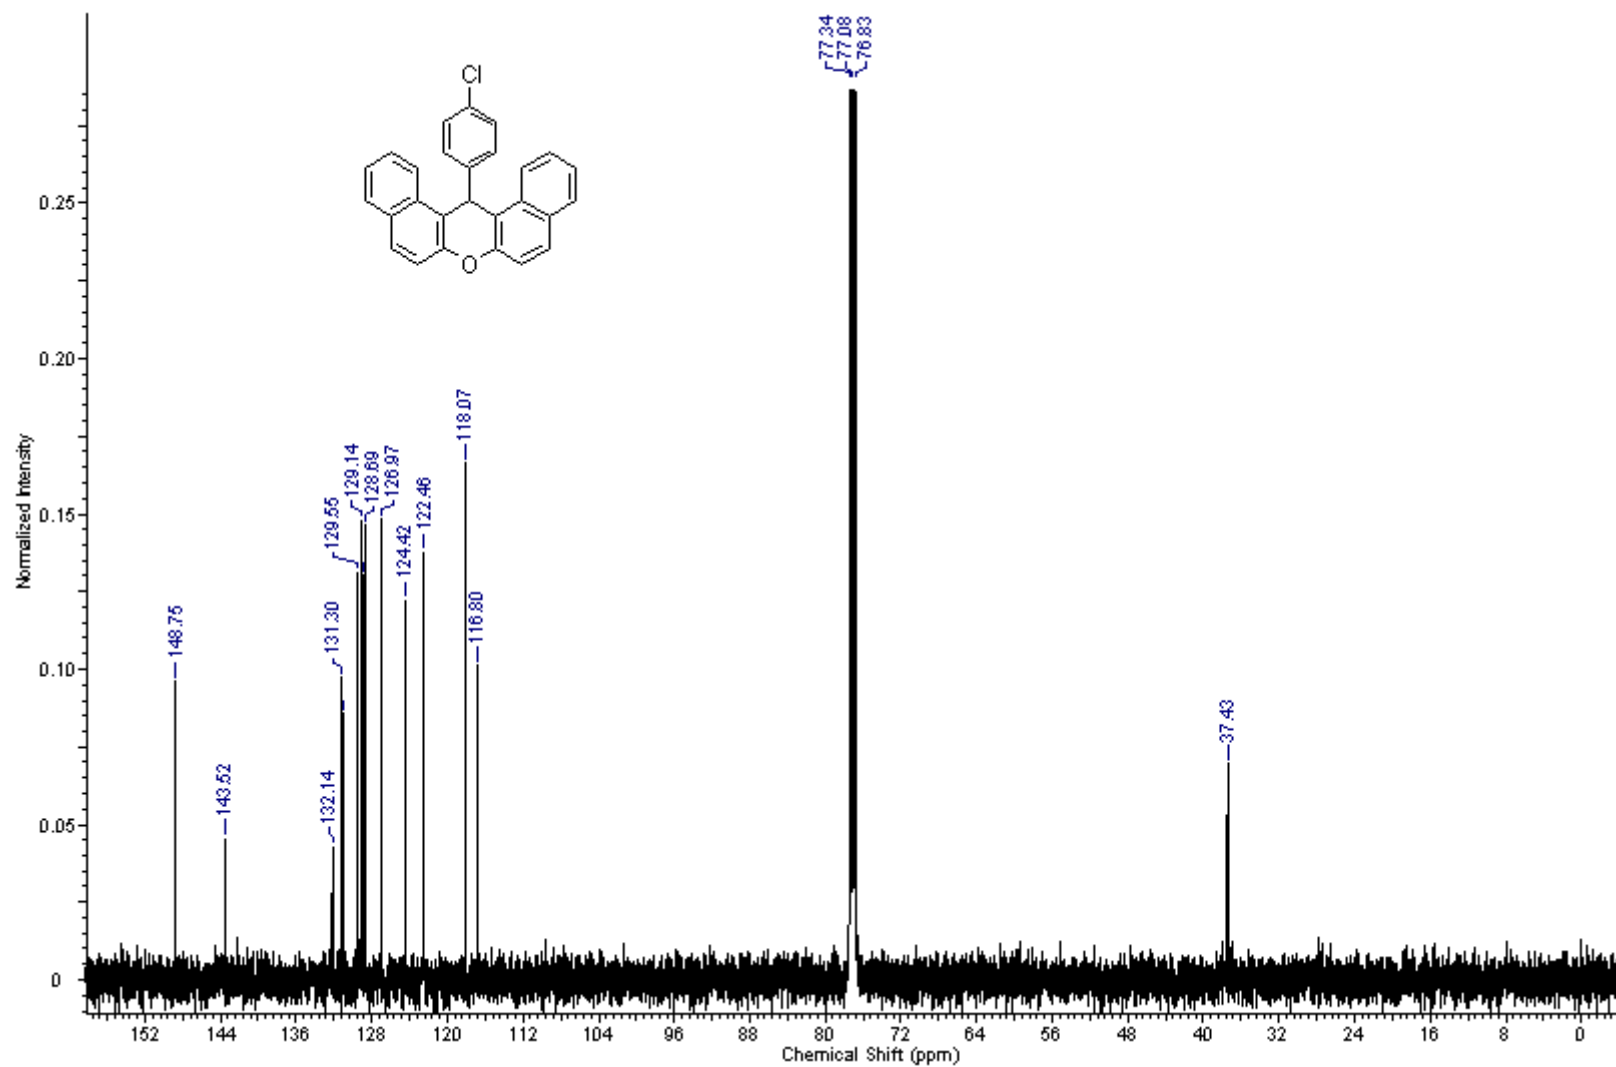

Figure S2. <sup>13</sup>C NMR of compound 14-(4-chlorophenyl)-14H-dibenzo[a,j]xanthene 3a.

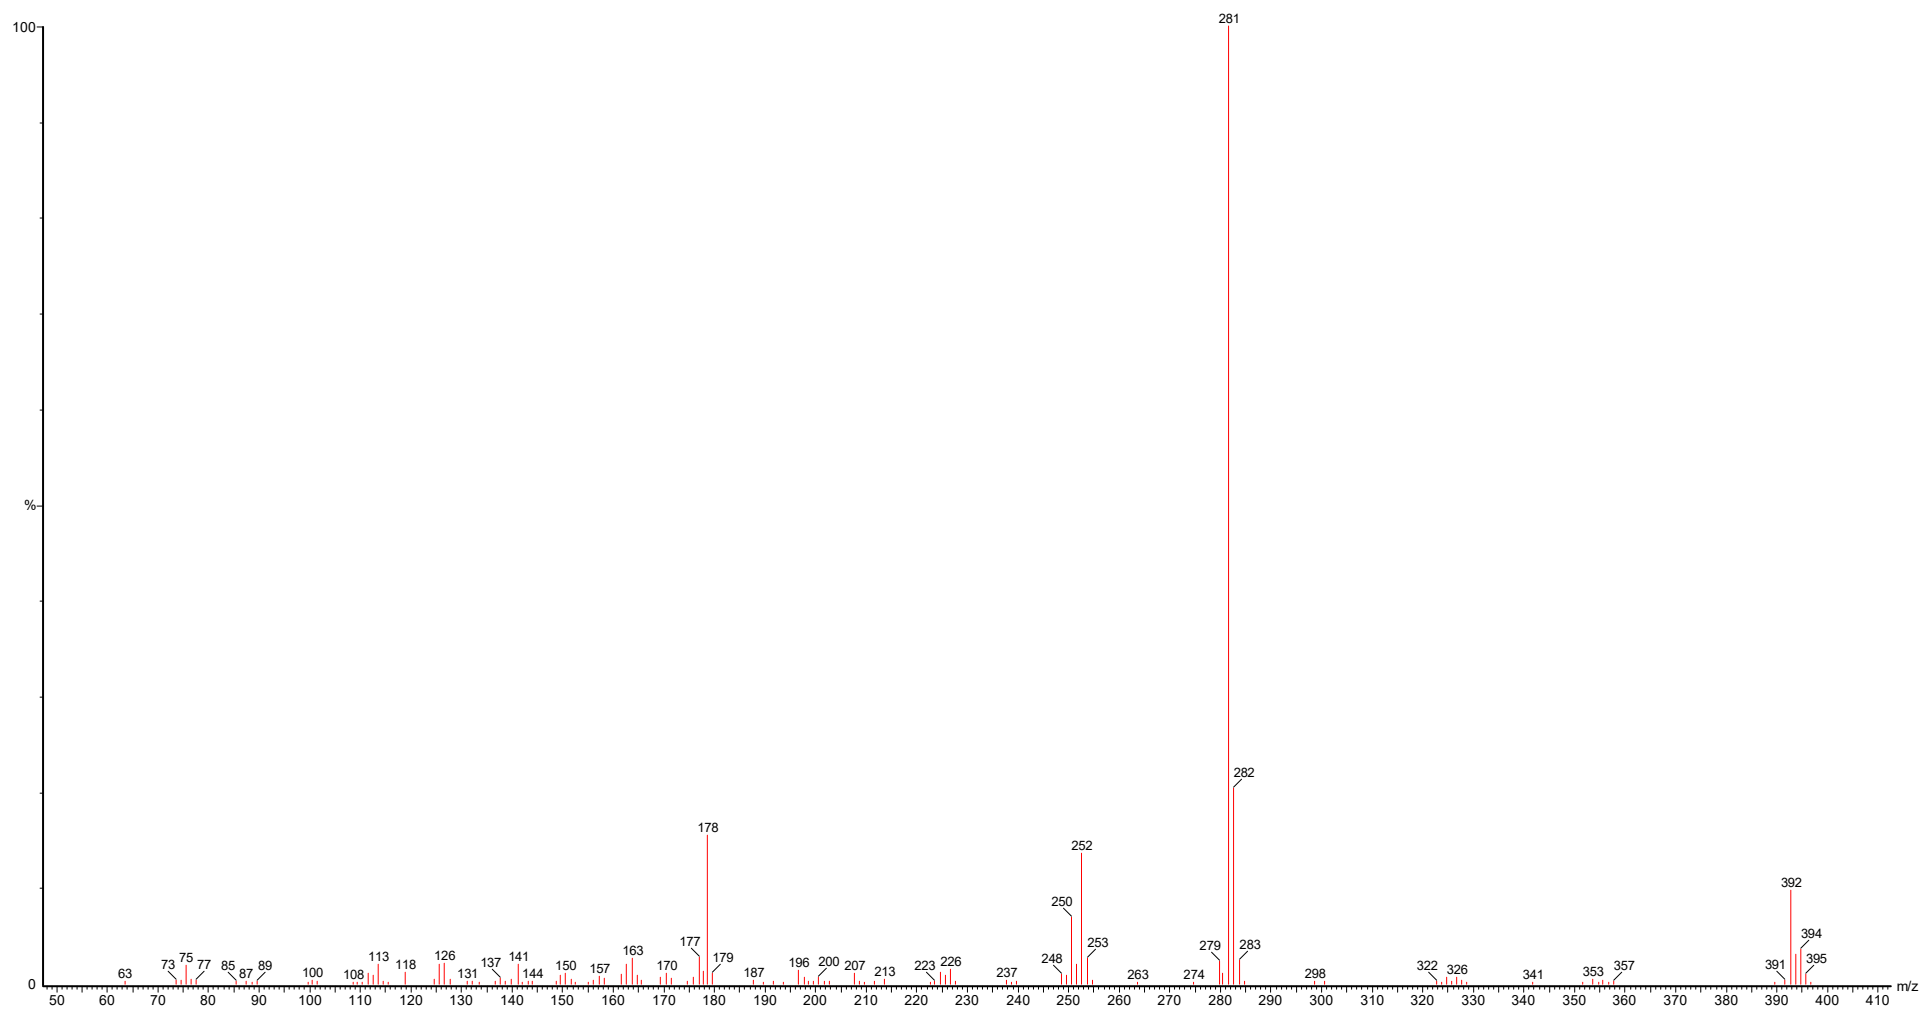

**Figure S3.** MS of compound 14-(4-Chlorophenyl)-14H-dibenzo[a,j]xanthene 3a.

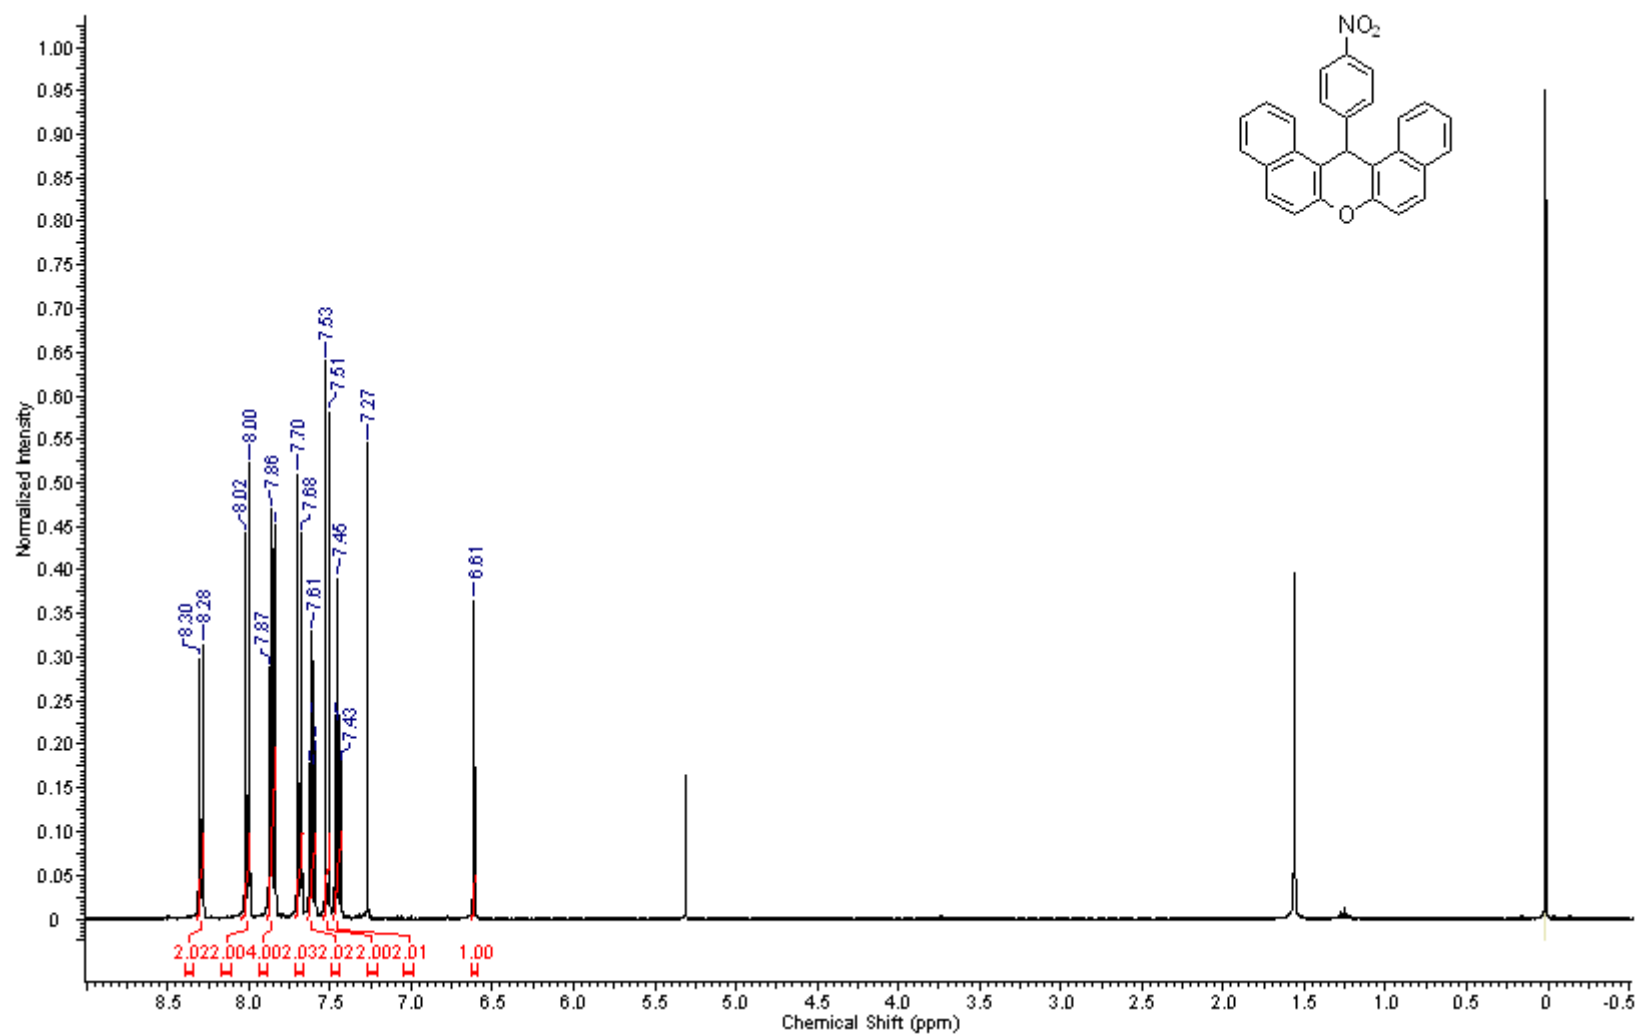

Figure S4. <sup>1</sup>H NMR of compound 14-(4-Nitrophenyl)-14H-dibenzo[*a,j*]xanthene 3b.

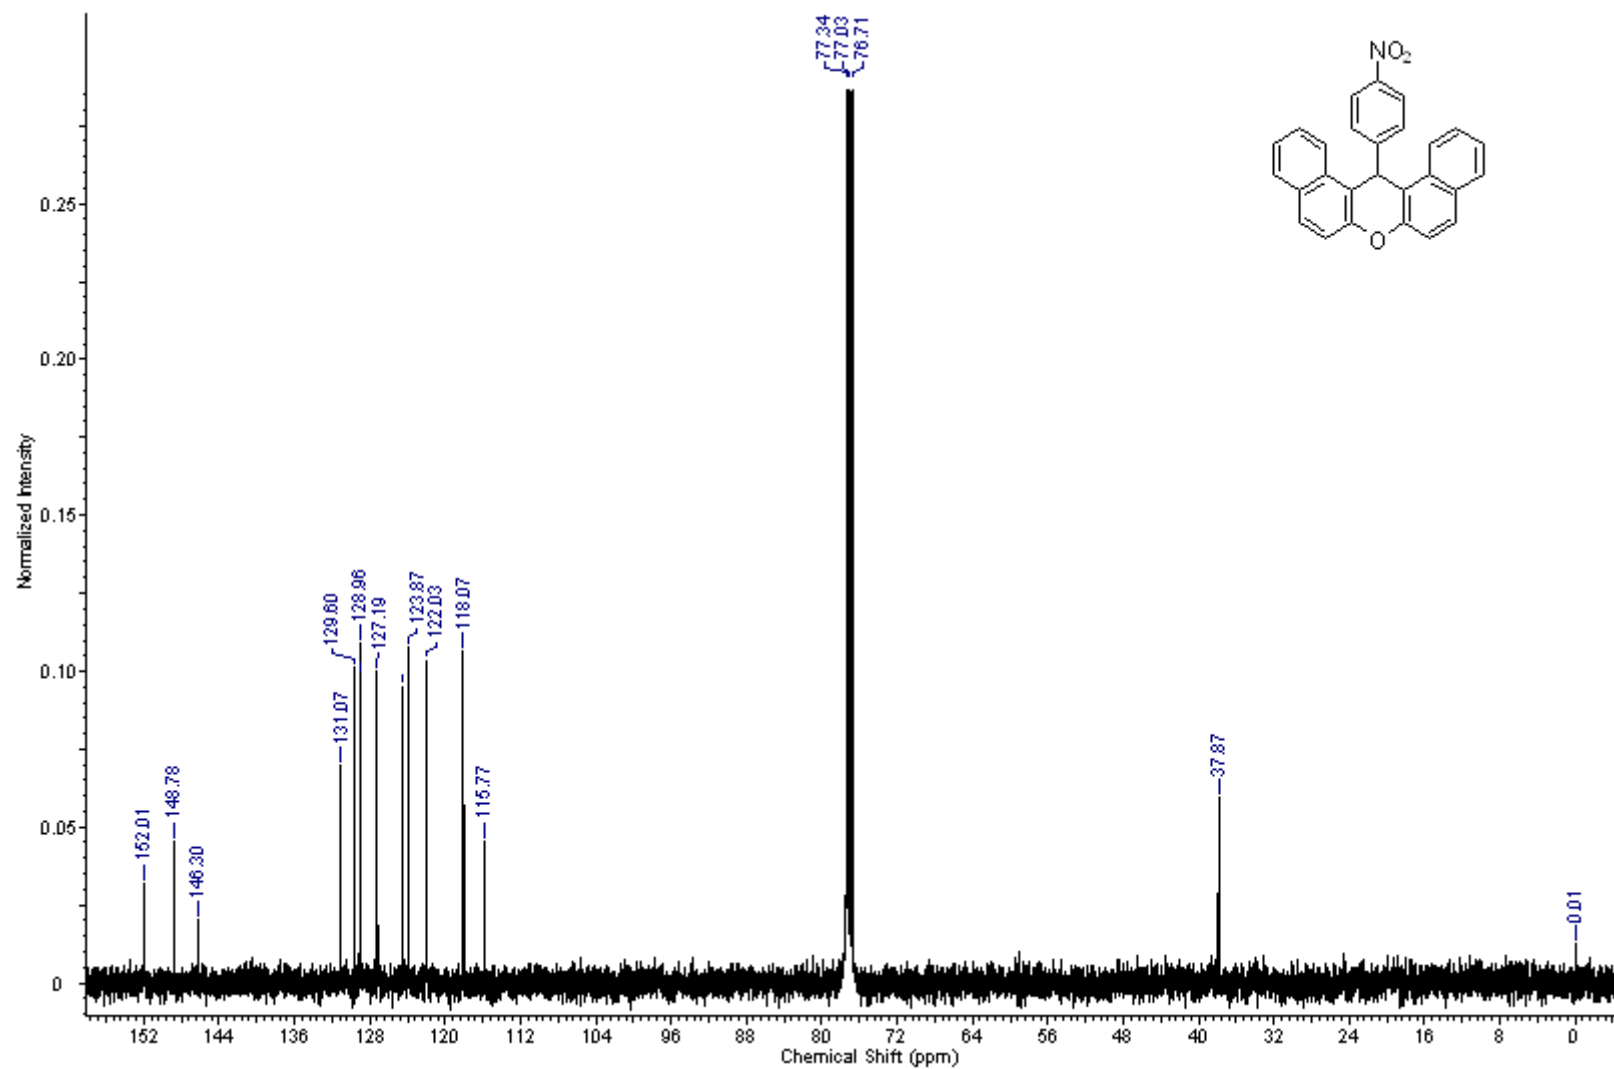

Figure S5.  $^{13}\text{C}$  NMR of compound 14-(4-Nitrophenyl)-14H-dibenzo[*a,j*]xanthene 3b.

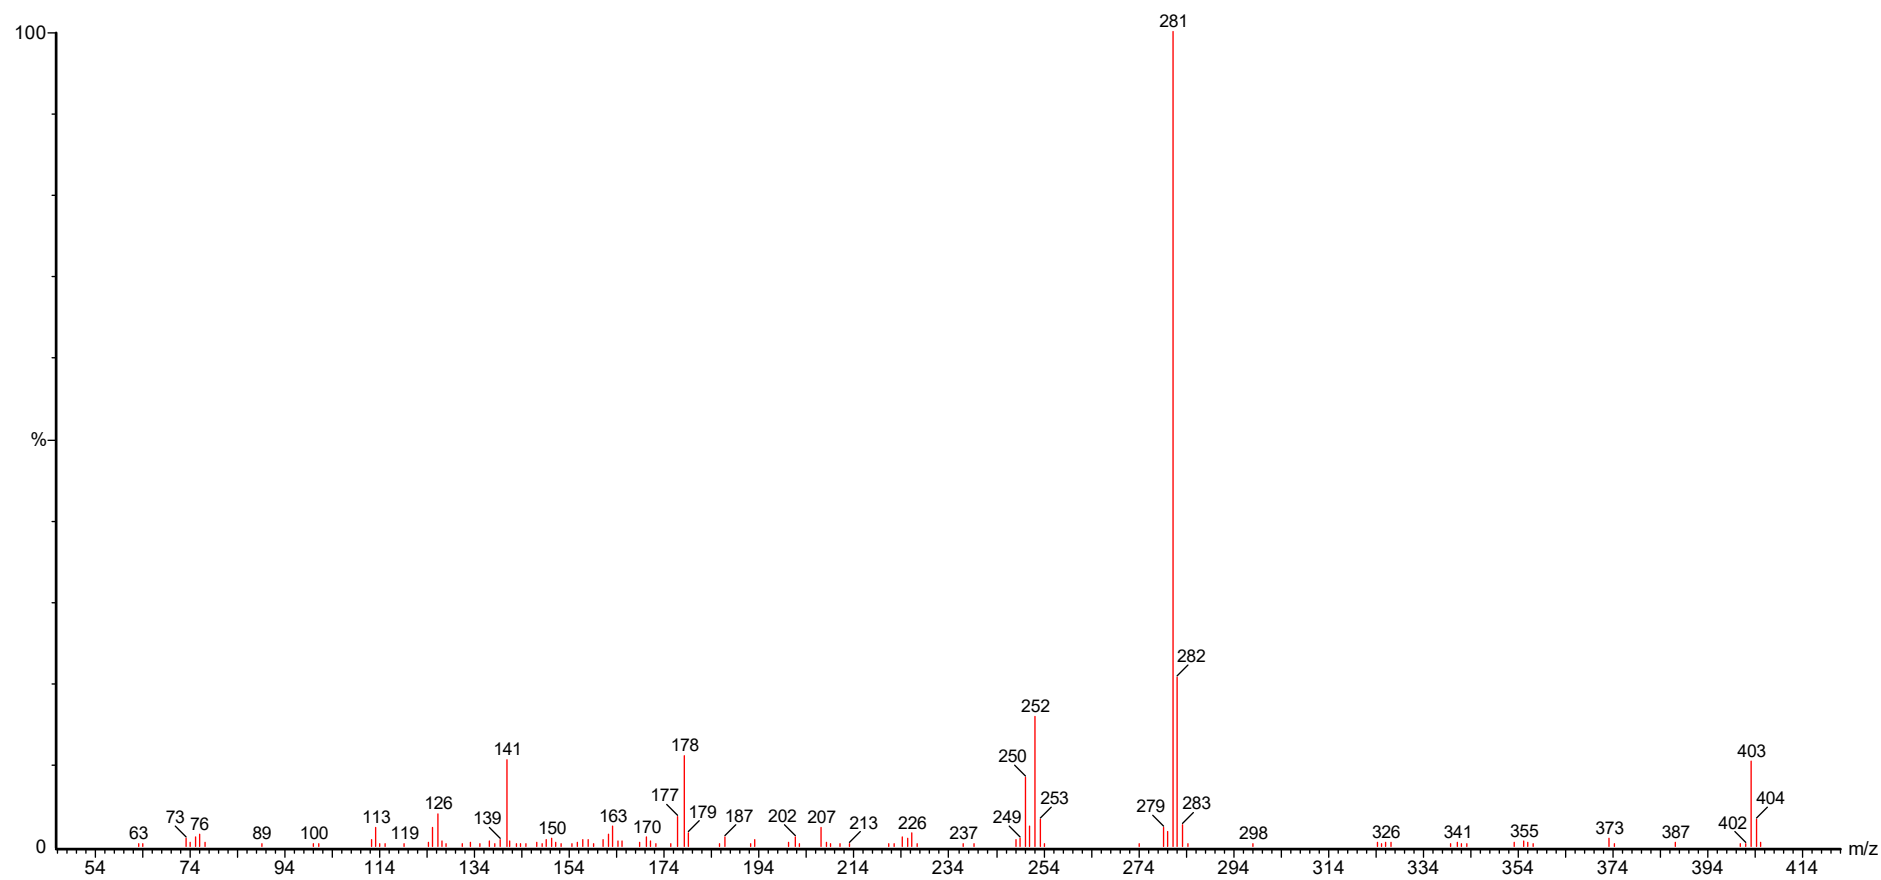

**Figure S6.** MS of compound 14-(4-Nitrophenyl)-14H-dibenzo[a,j]xanthene 3b.



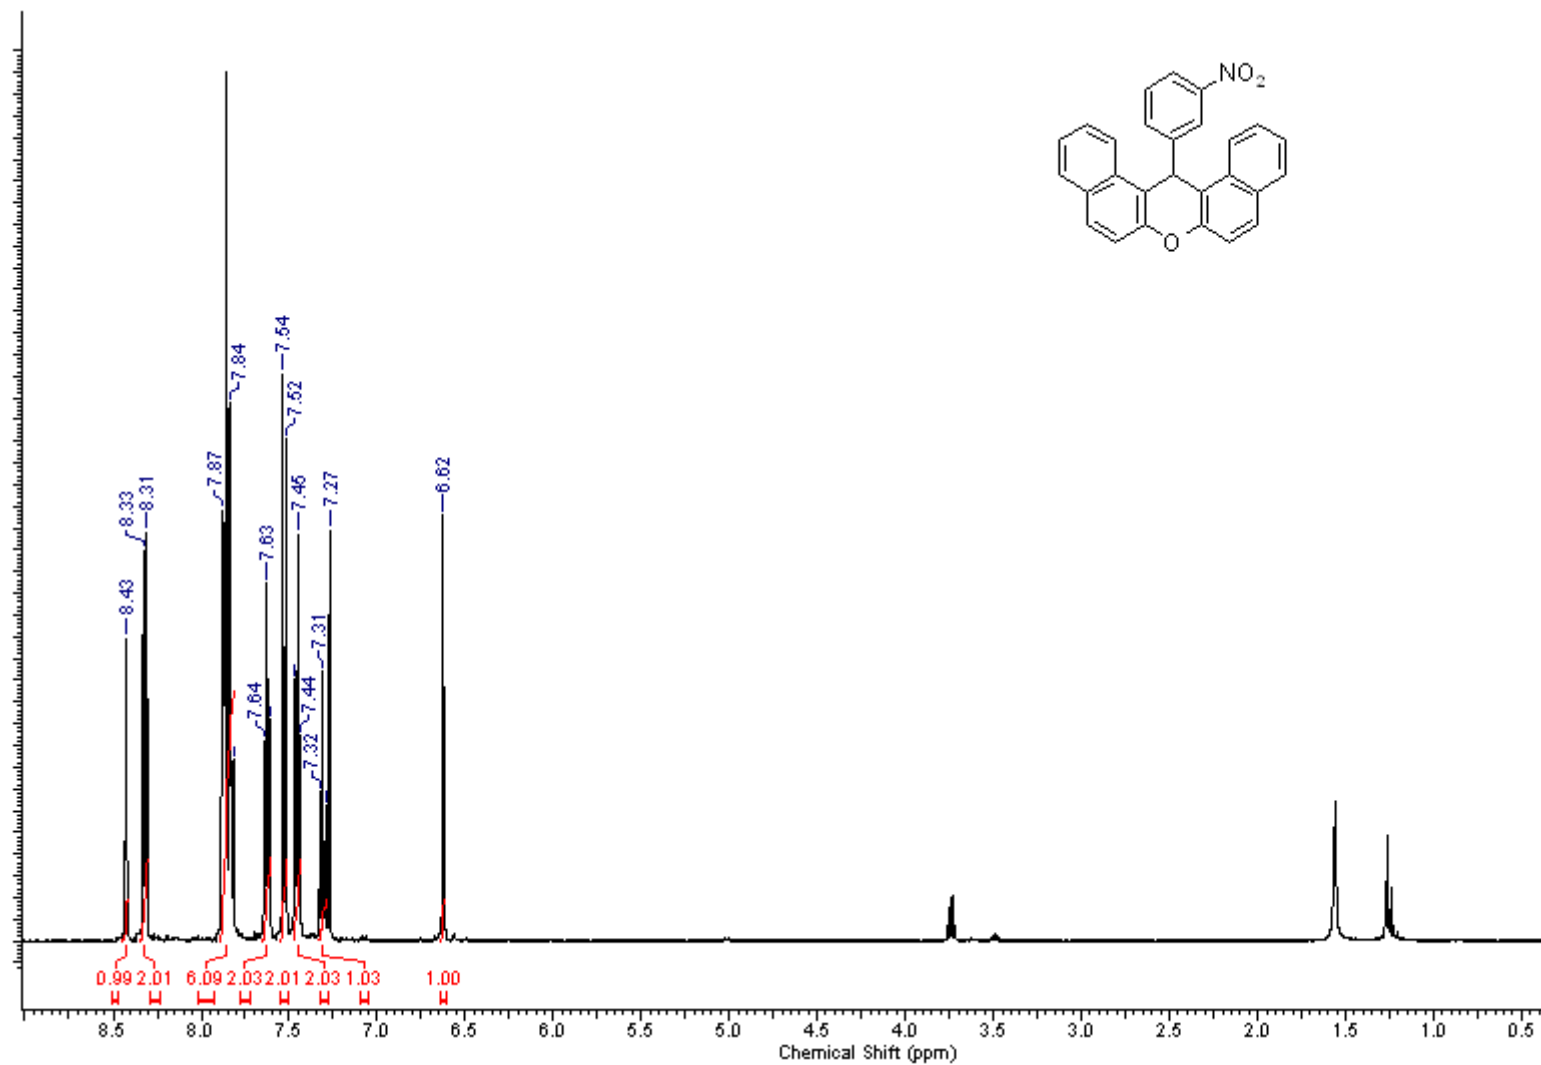

Figure S7.  $^1\text{H}$  NMR of compound 14-(3-Nitrophenyl)-14H-dibenzo[a,j]xanthene 3c.

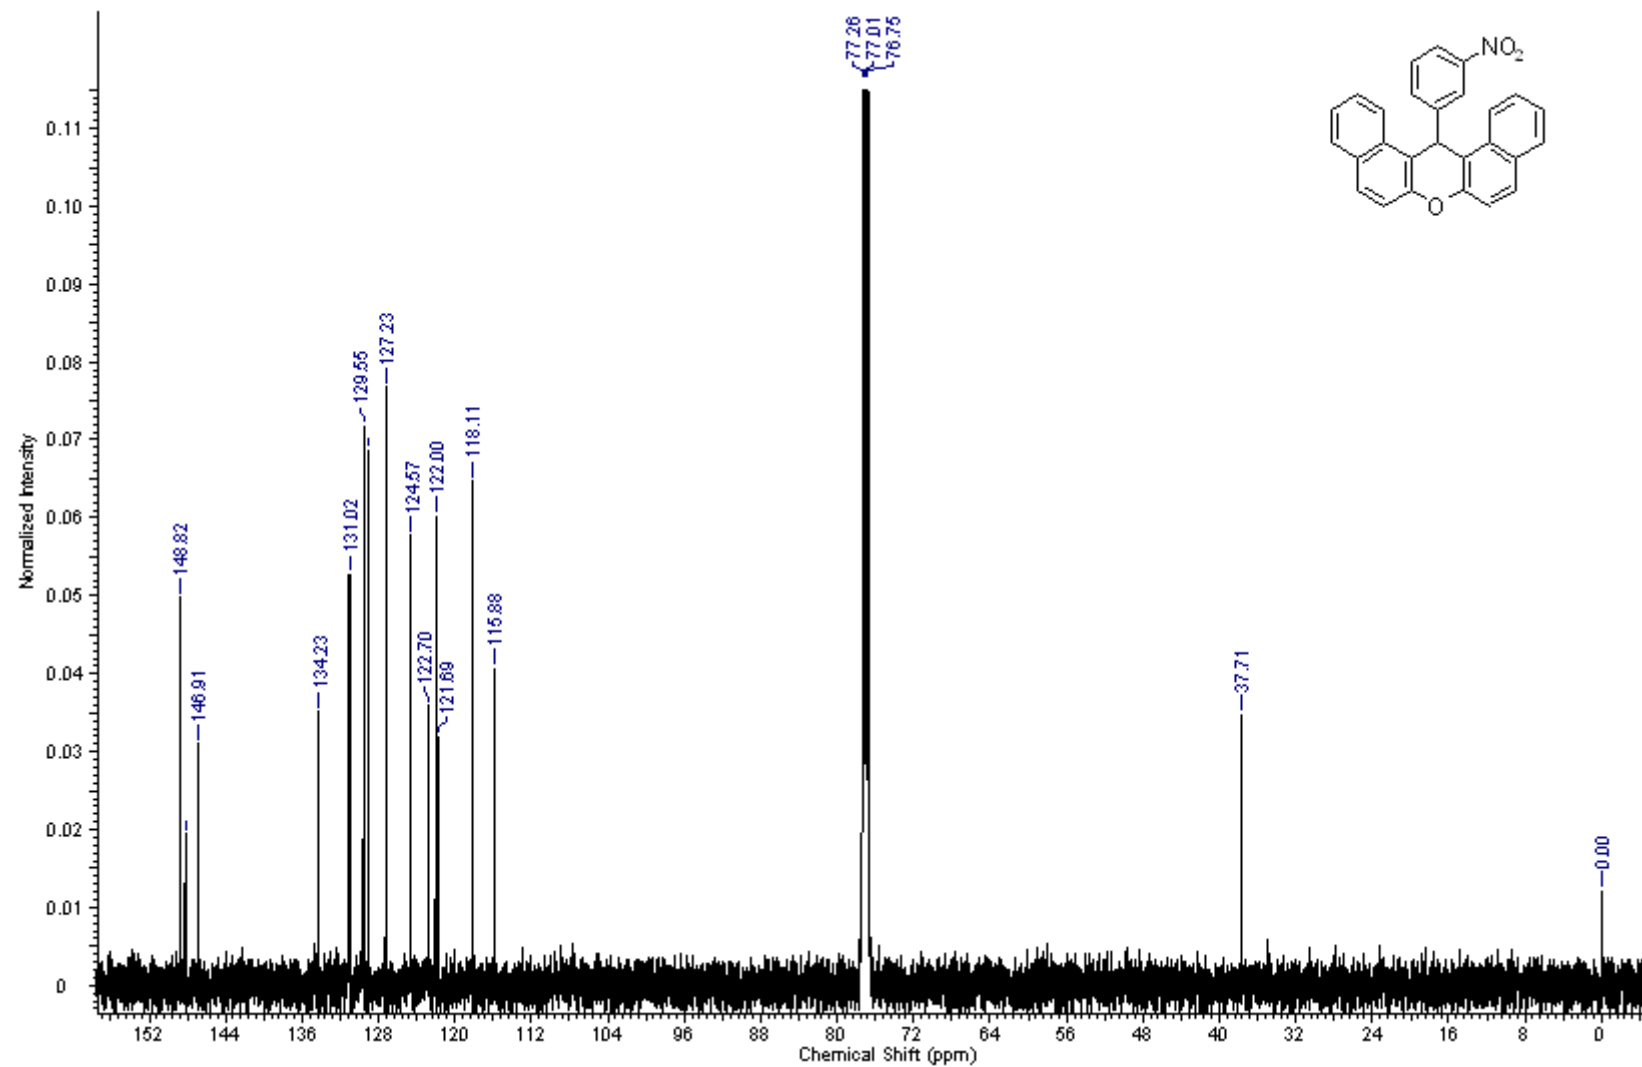

**Figure S8.** <sup>13</sup>C NMR of compound 14-(3-Nitrophenyl)-14H-dibenzo[*a,j*]xanthene 3c.

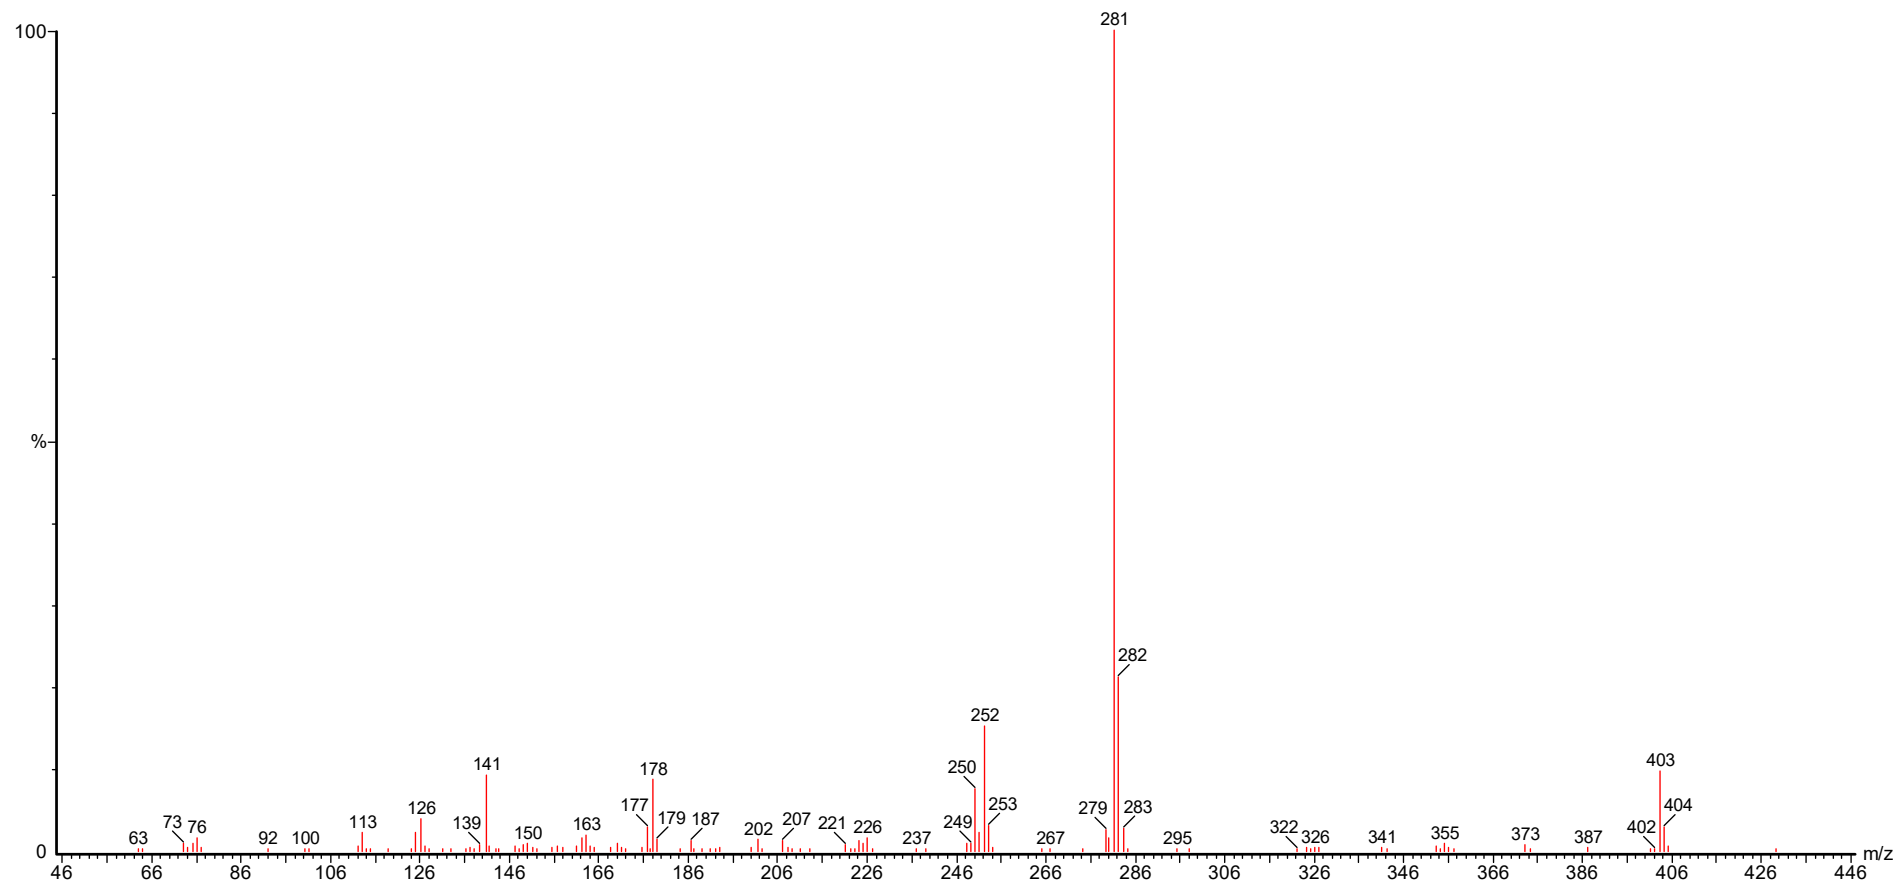

**Figure S9.** MS of compound 14-(3-Nitrophenyl)-14H-dibenzo[a,j]xanthene 3c.



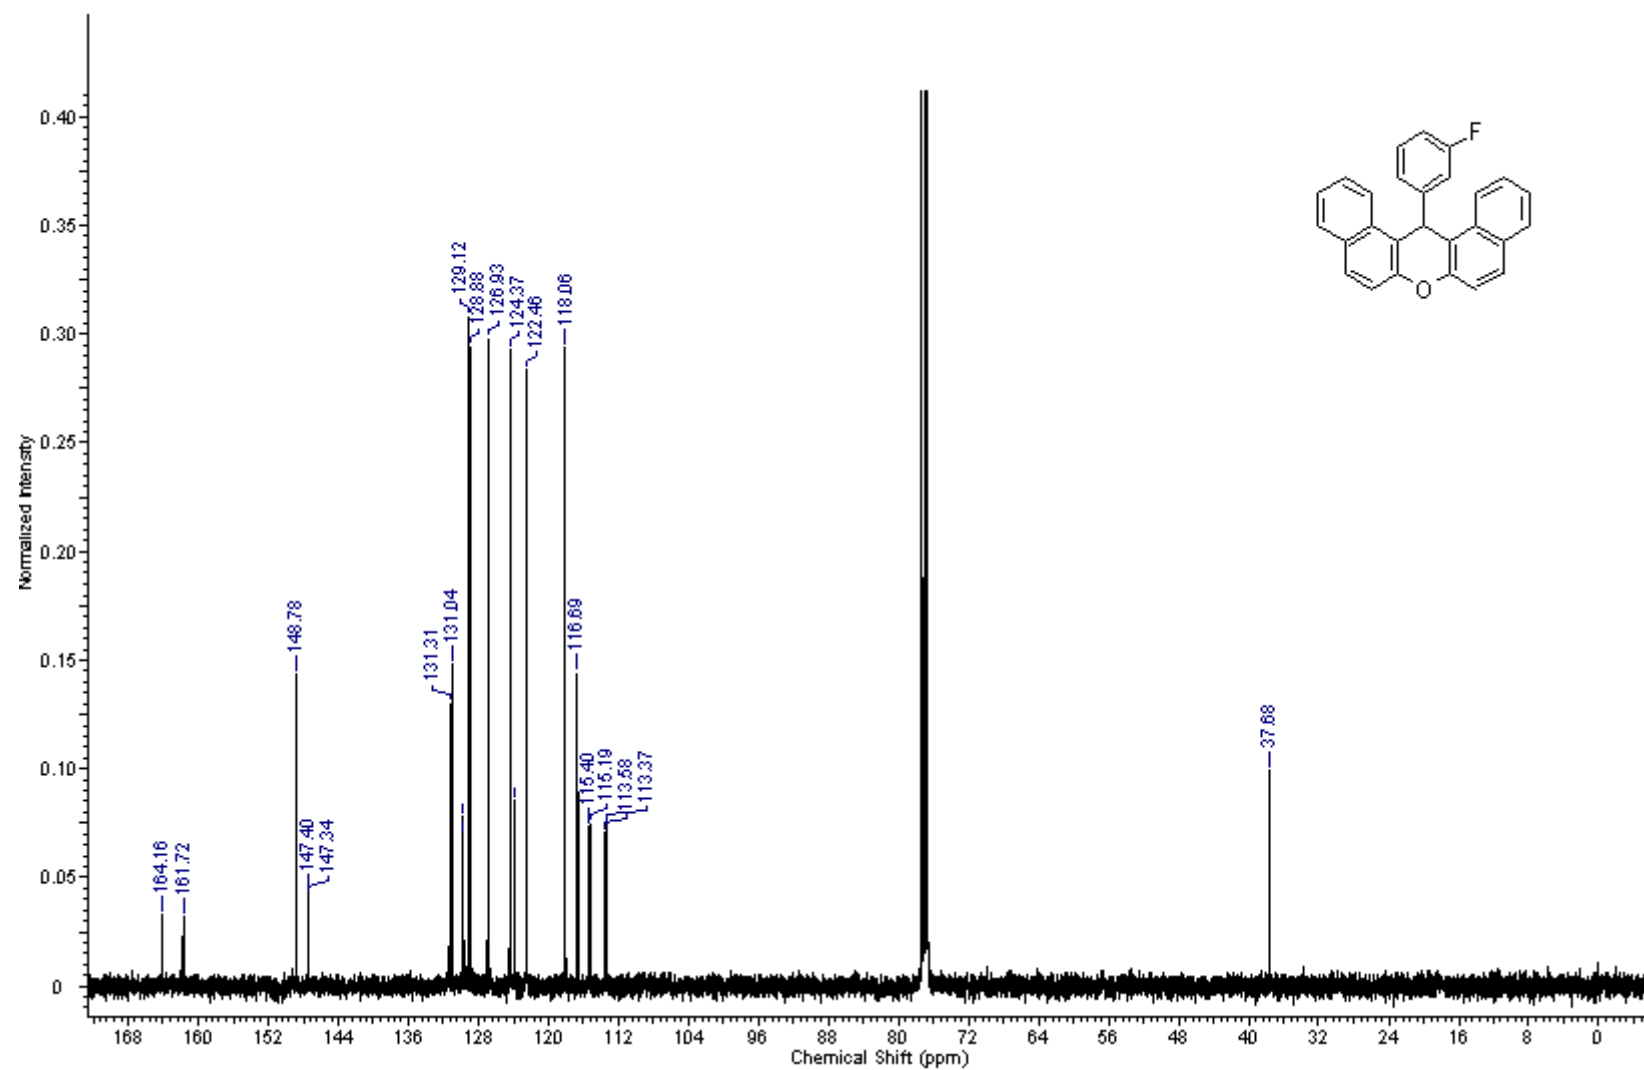

Figure S11.  $^{13}\text{C}$  NMR of compound 14-(3-Fluorophenyl)-14H-dibenzo[*a,j*]xanthene 3d.

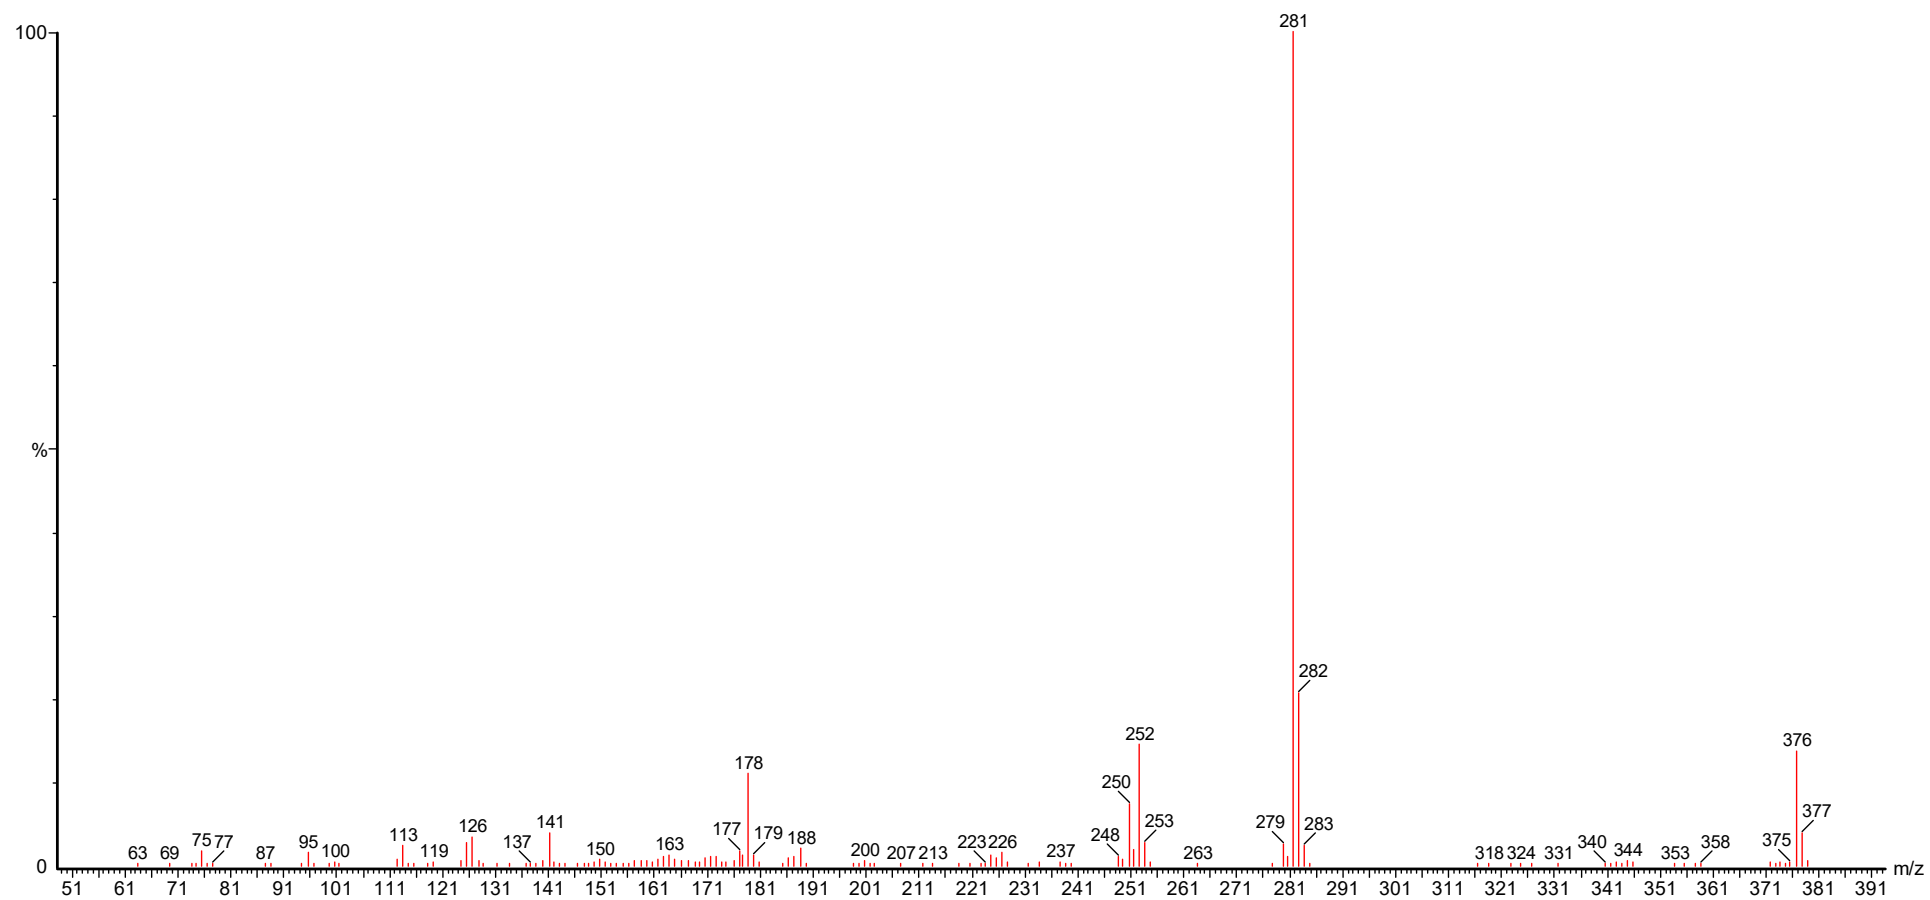

**Figure S12.** MS of compound 14-(3-Fluorophenyl)-14H-dibenzo[*a,j*]xanthene 3d.

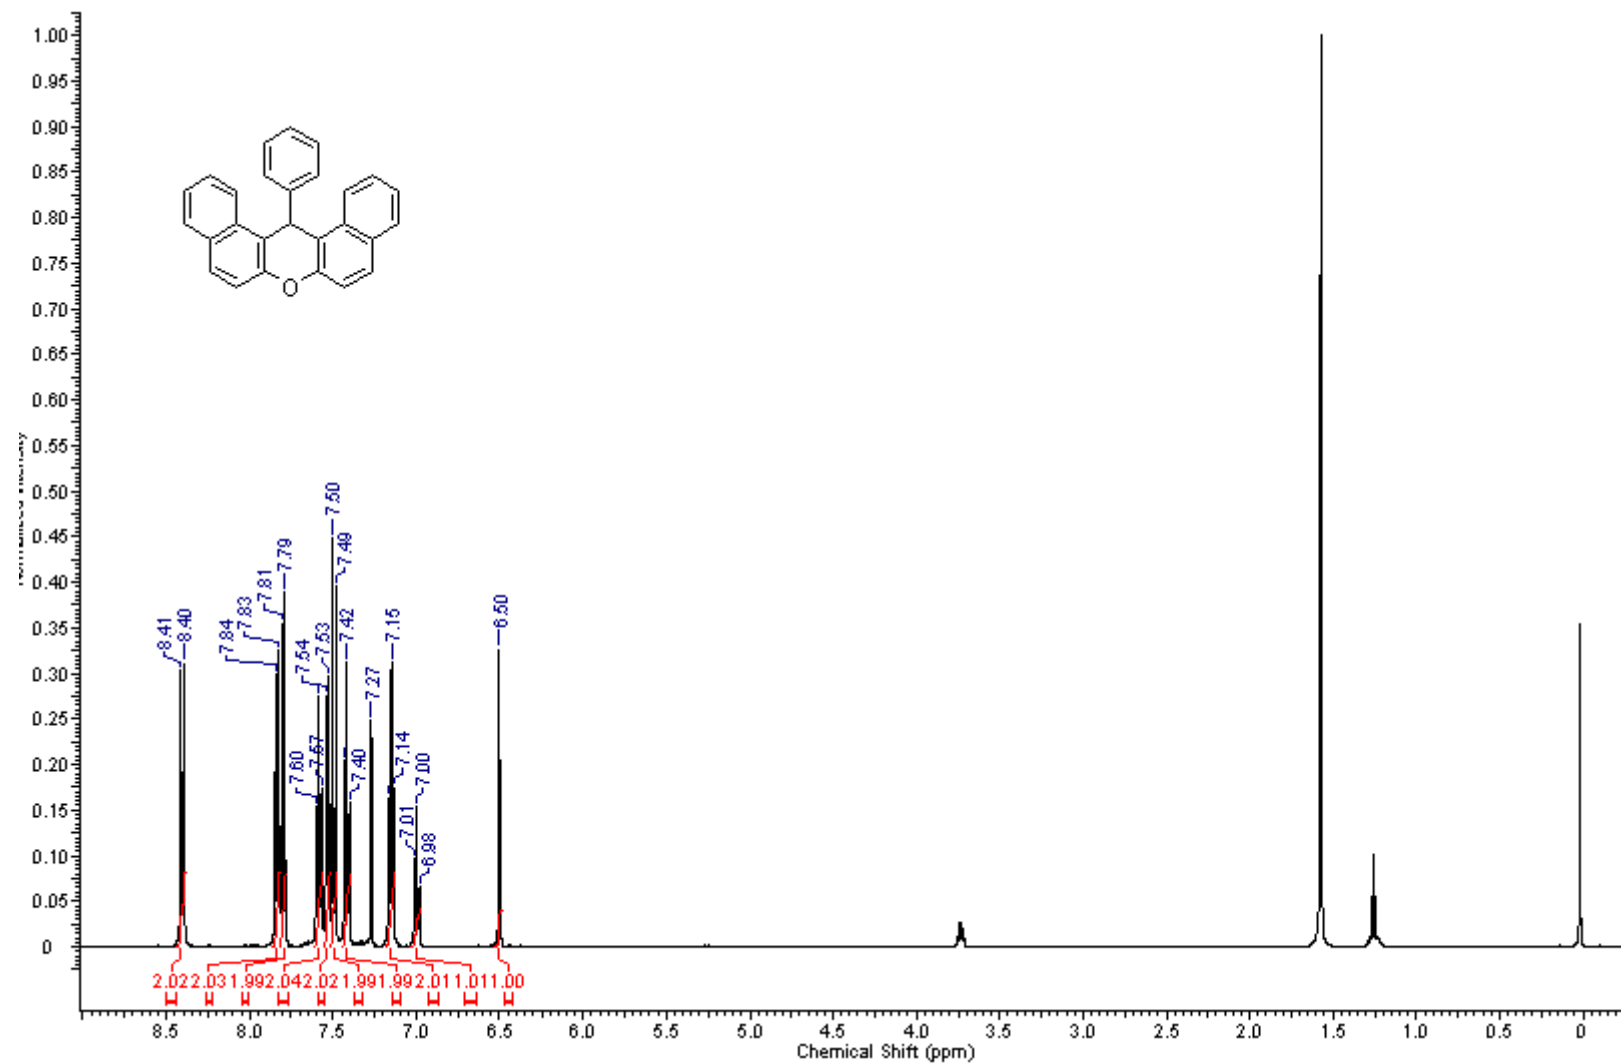

Figure S13.  $^1\text{H}$  NMR of compound 14-Phenyl-14H-dibenzo[*a,j*]xanthene 3f.

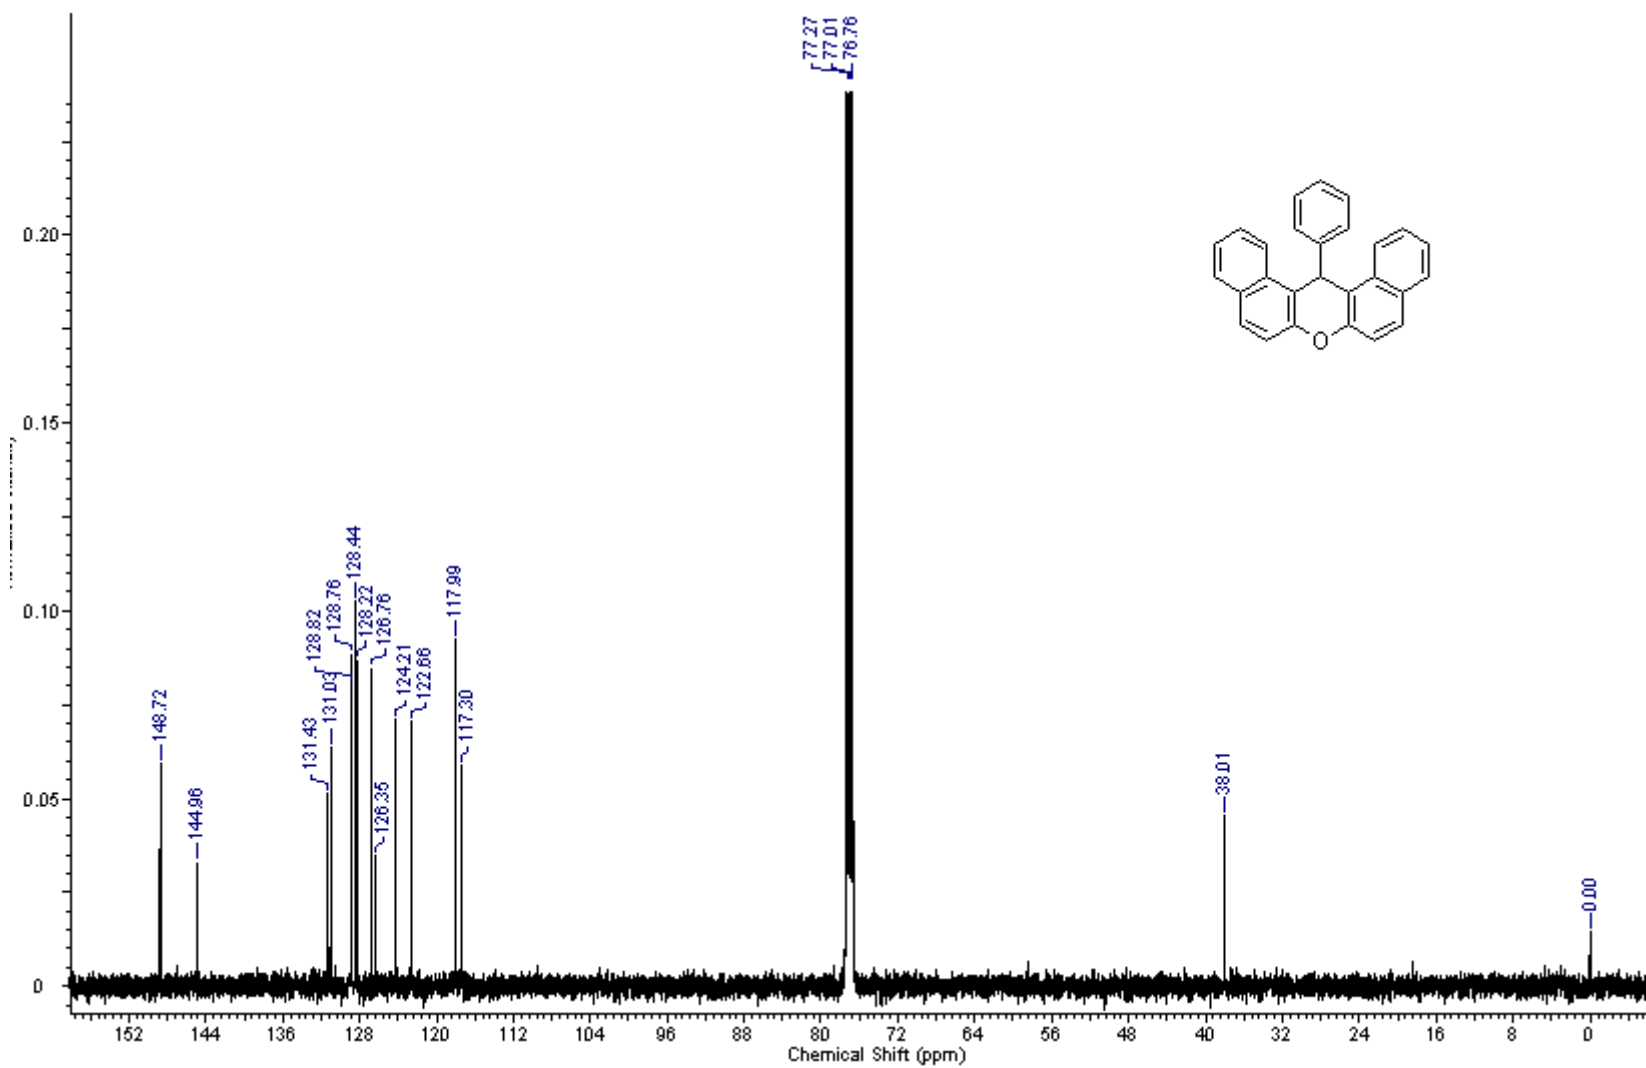

**Figure S14.**  $^{13}\text{C}$  NMR of compound 14-Phenyl-14H-dibenzo[*a,j*]xanthene 3f.



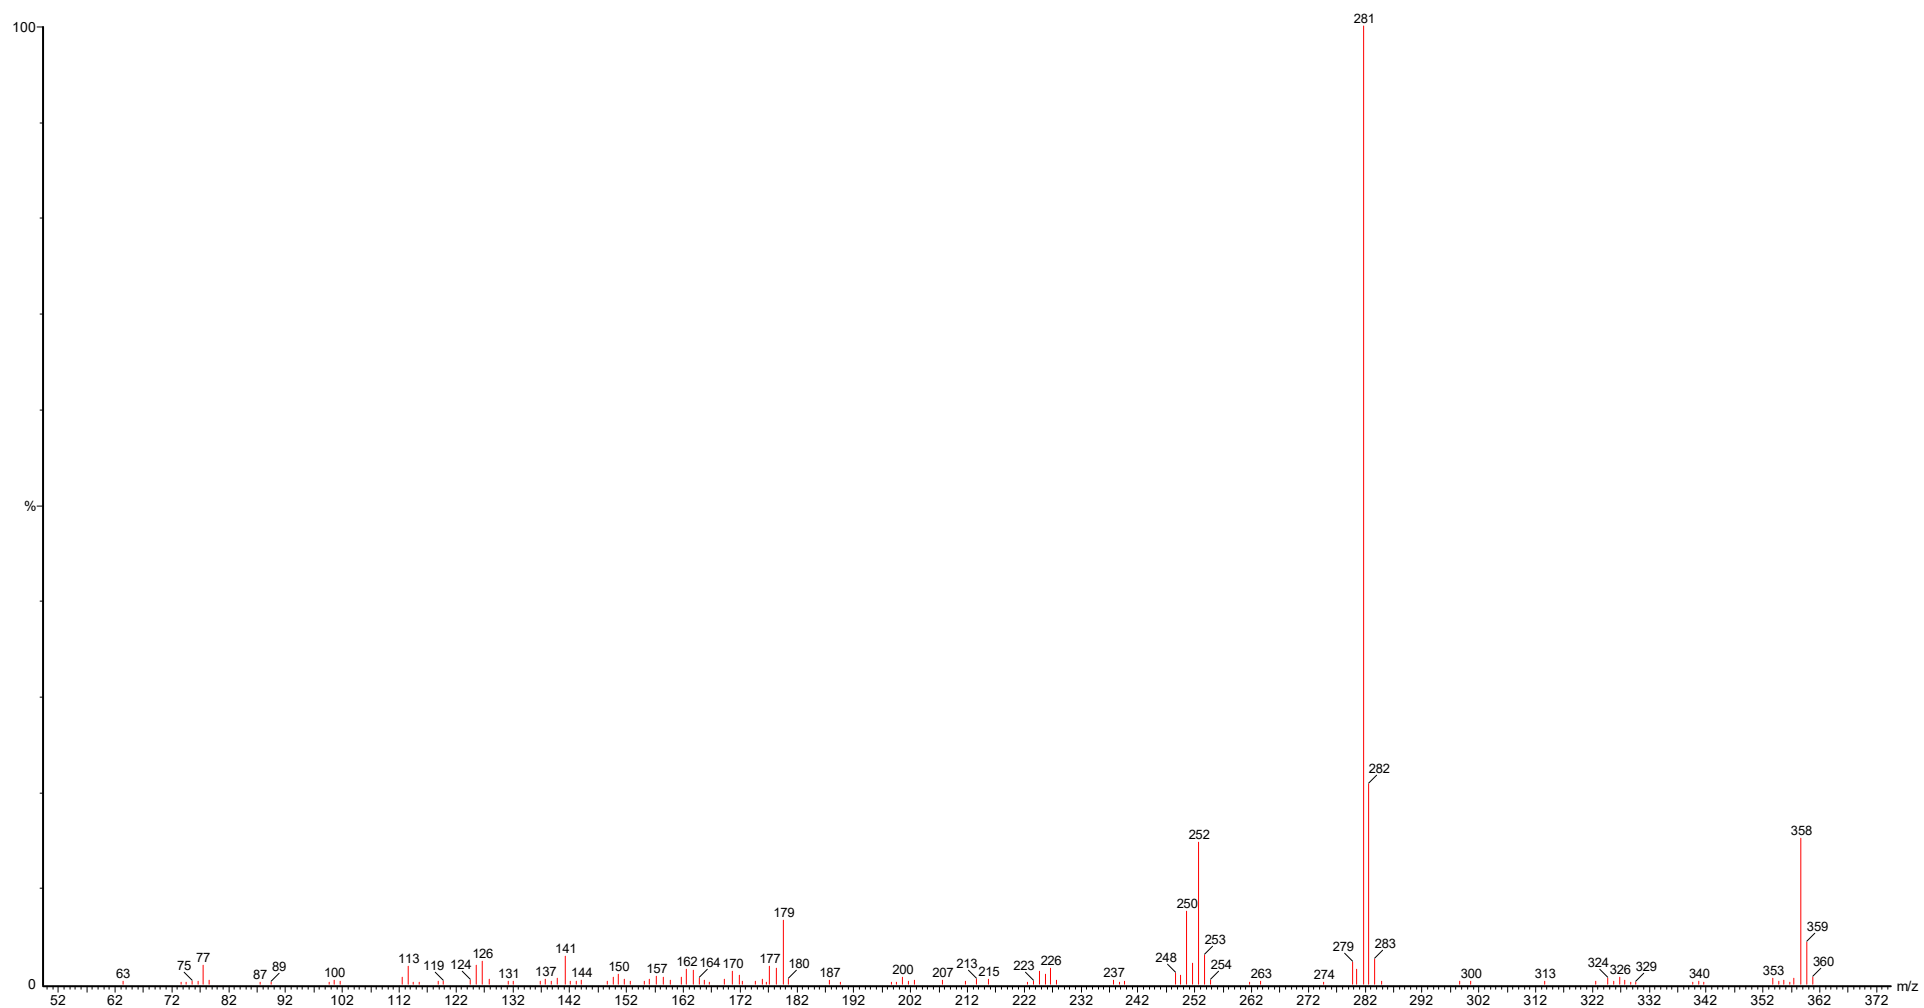

**Figure S15.** MS of compound 14-Phenyl-14H-dibenzo[a,j]xanthene 3f.

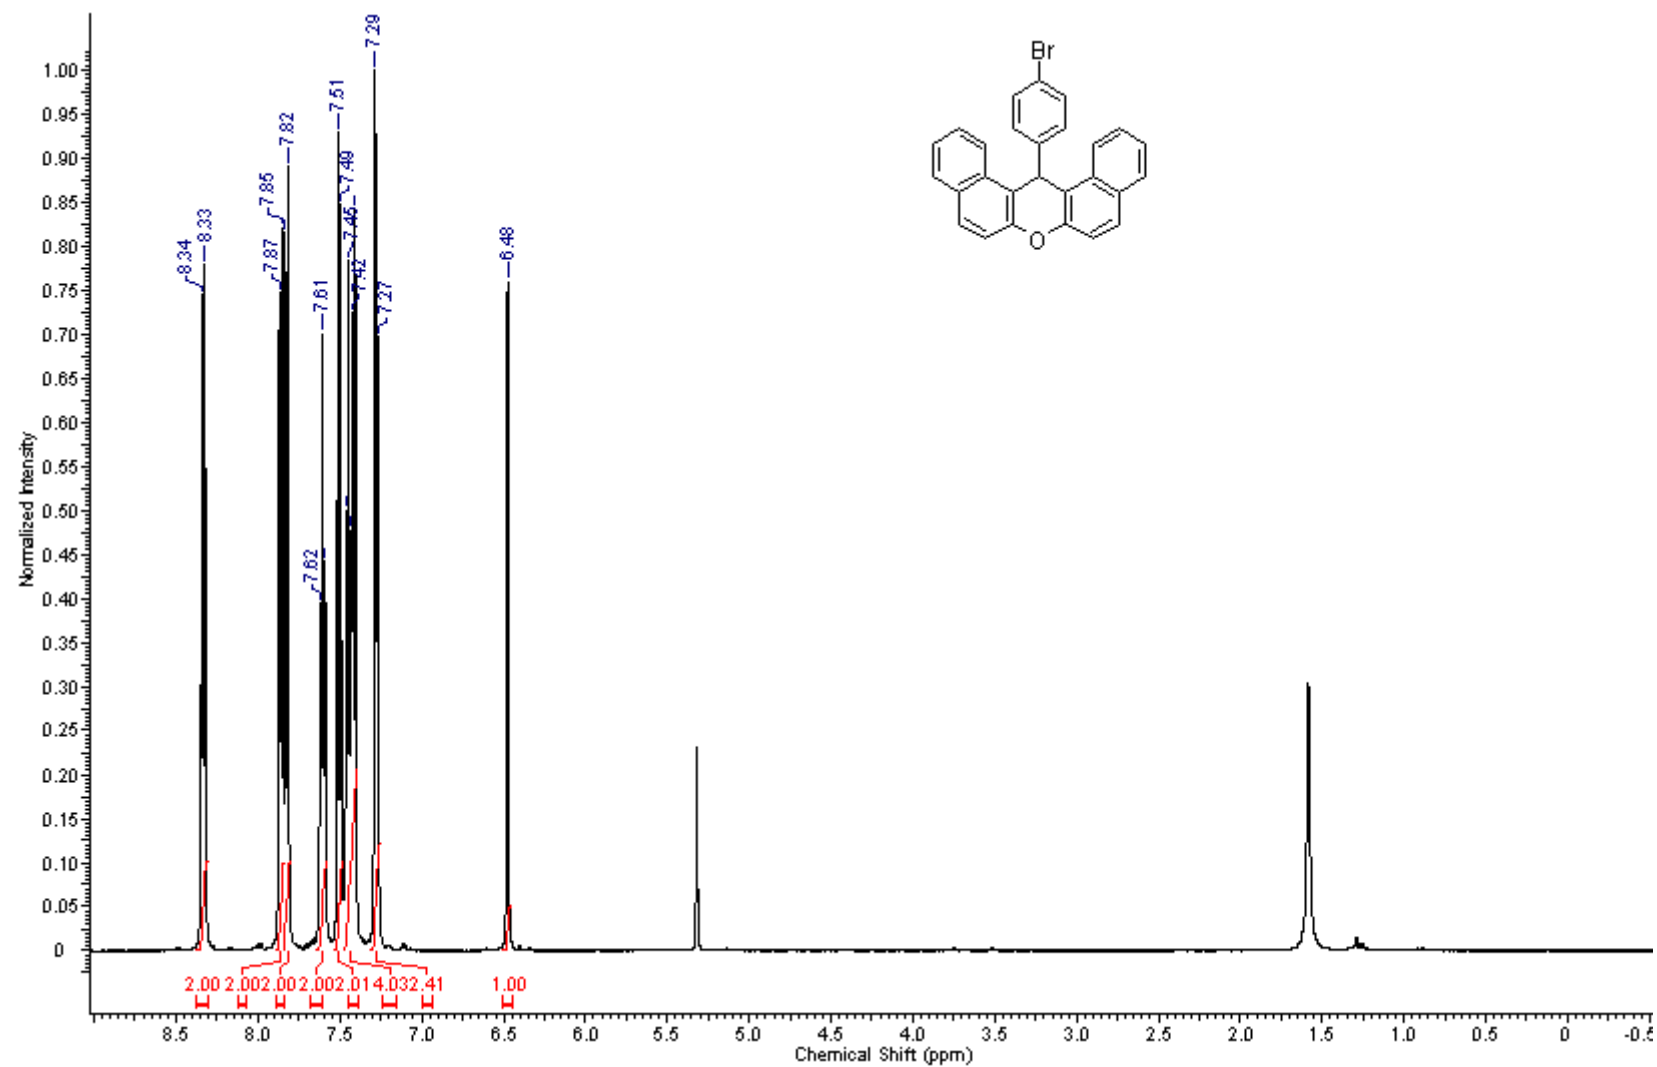

Figure S16.  $^1\text{H}$  NMR of compound 14-(4-Bromophenyl)-14H-dibenzo[*a,j*]xanthene 3g.

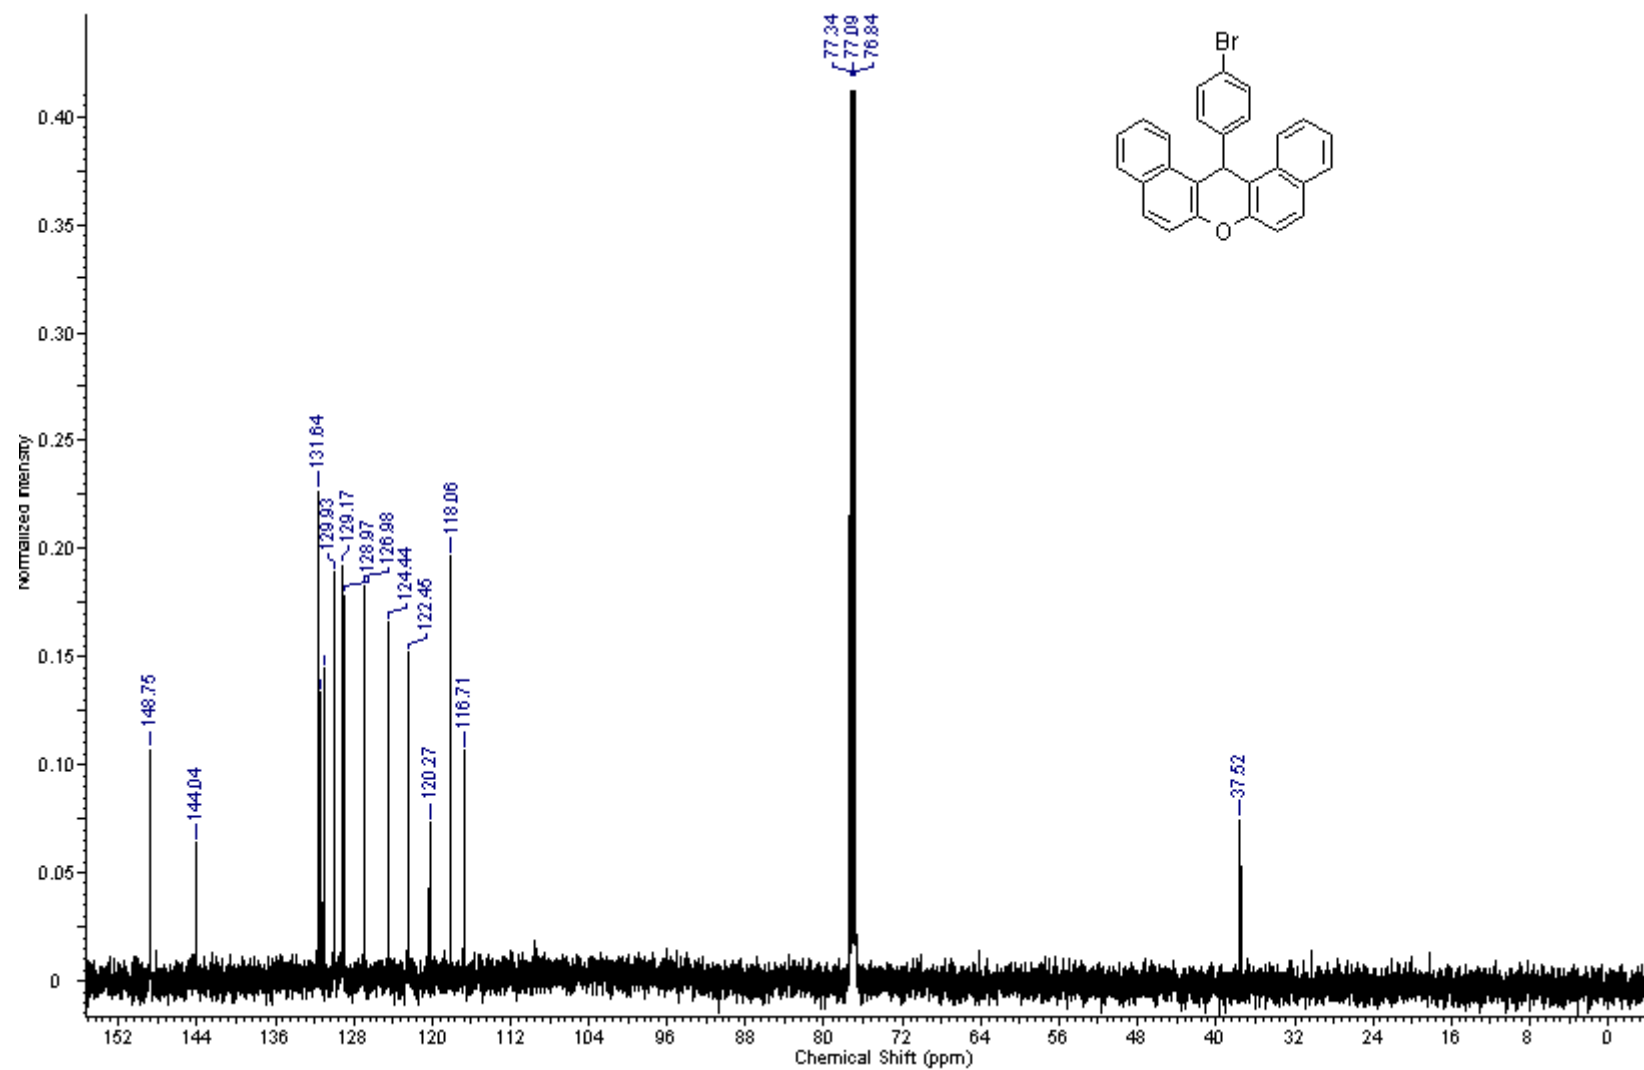

Figure S17.  $^{13}\text{C}$  NMR of compound 14-(4-Bromophenyl)-14H-dibenzo[*a,j*]xanthene 3g.

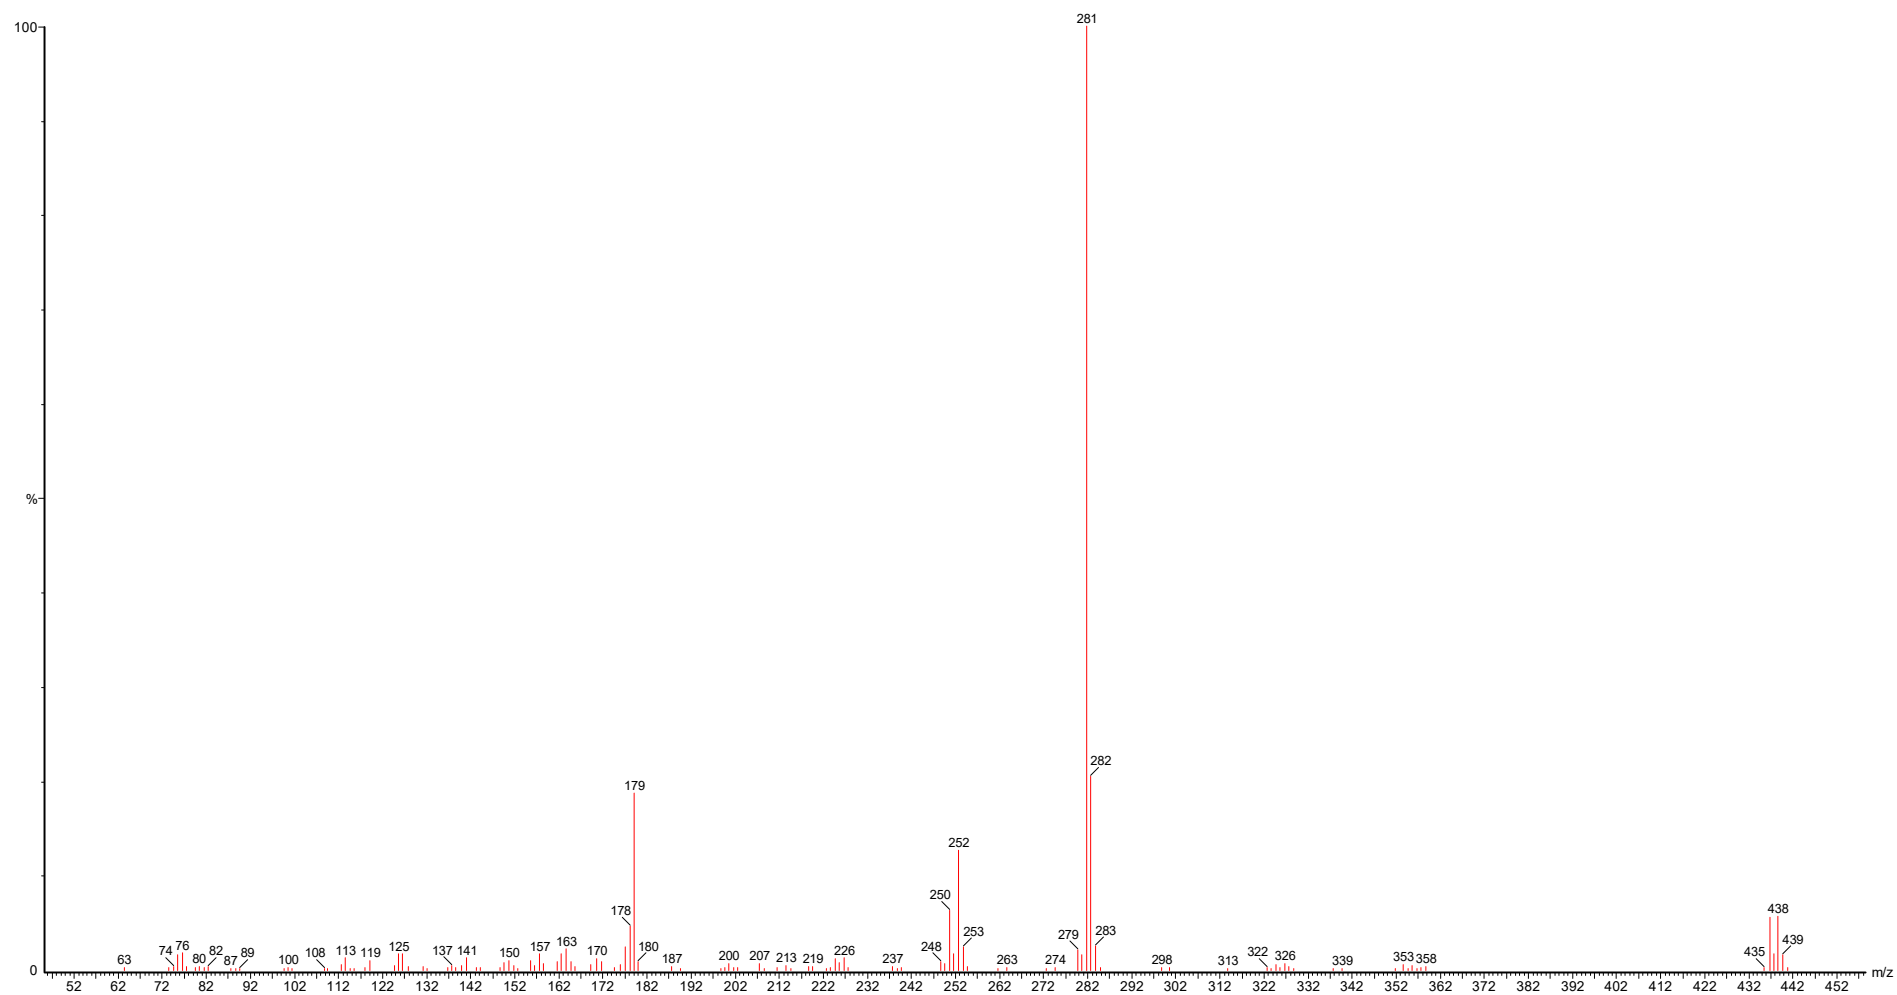

**Figure S18.** MS of compound 14-(4-Bromophenyl)-14H-dibenzo[a,j]xanthene 3g.

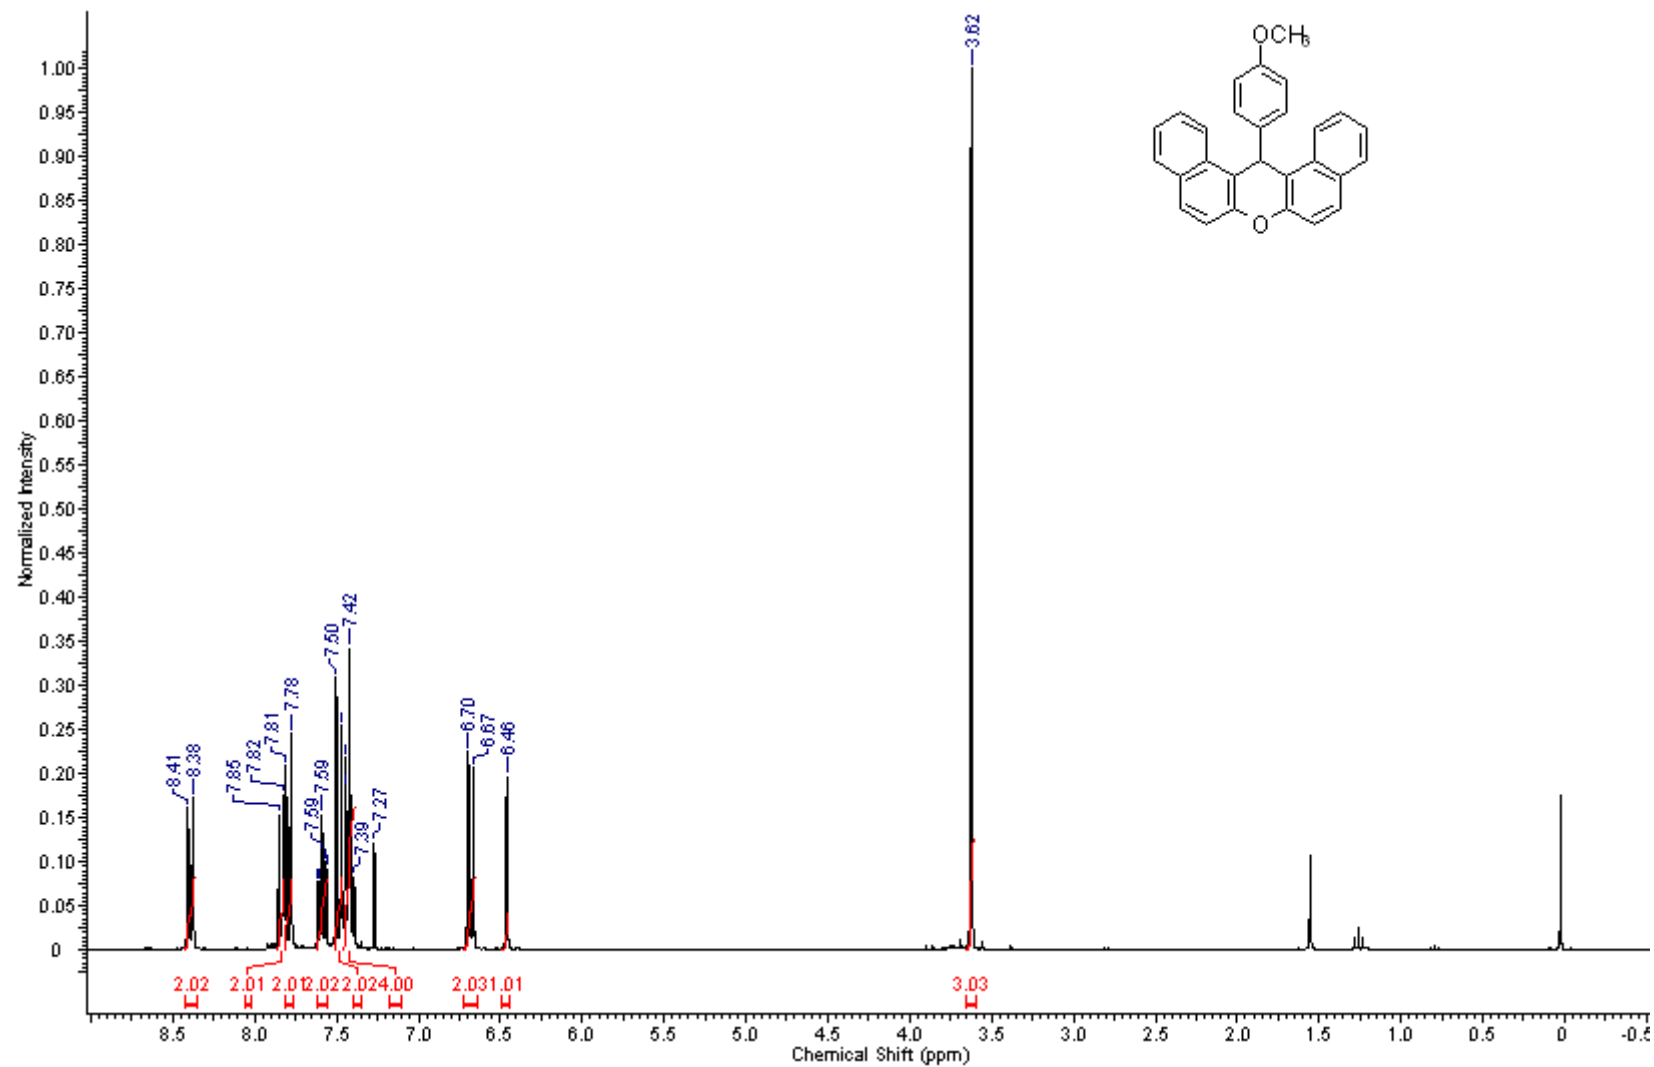

Figure S19.  $^1\text{H}$  NMR of compound 14-(4-Methoxyphenyl)-14H-dibenzo[*a,j*]xanthene 3h.

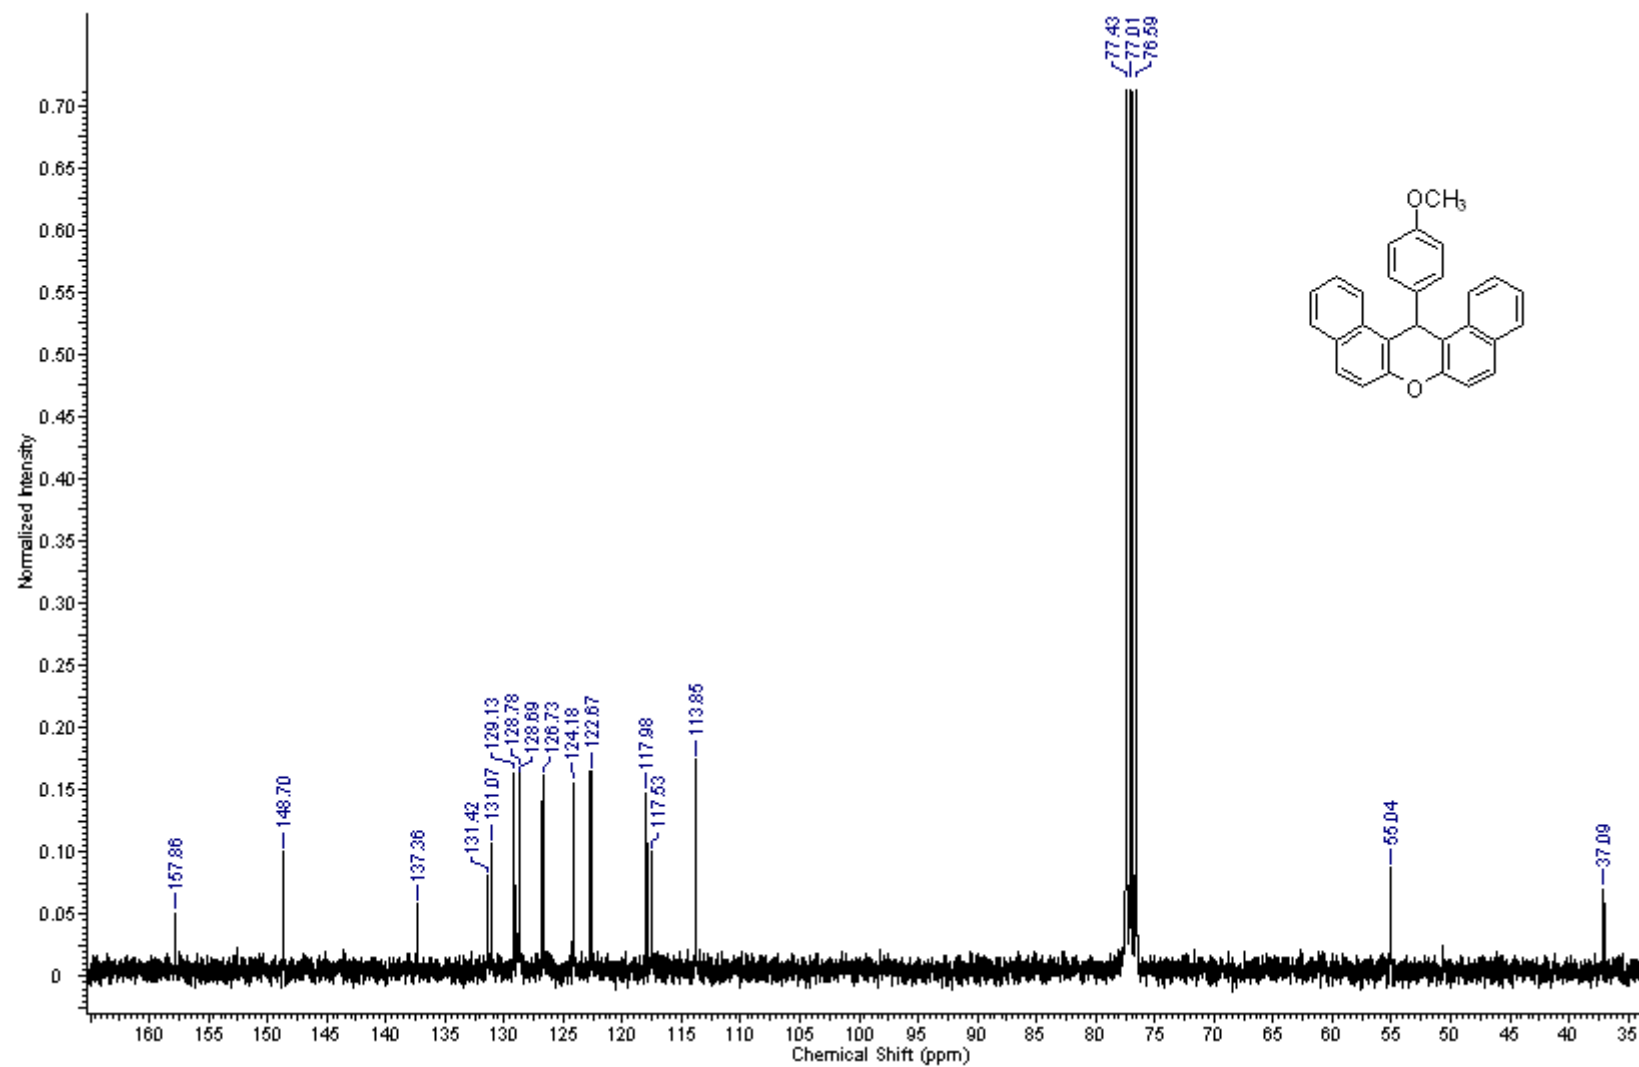

Figure S20.  $^{13}\text{C}$  NMR of compound 14-(4-Methoxyphenyl)-14H-dibenzo[*a,j*]xanthene 3h.

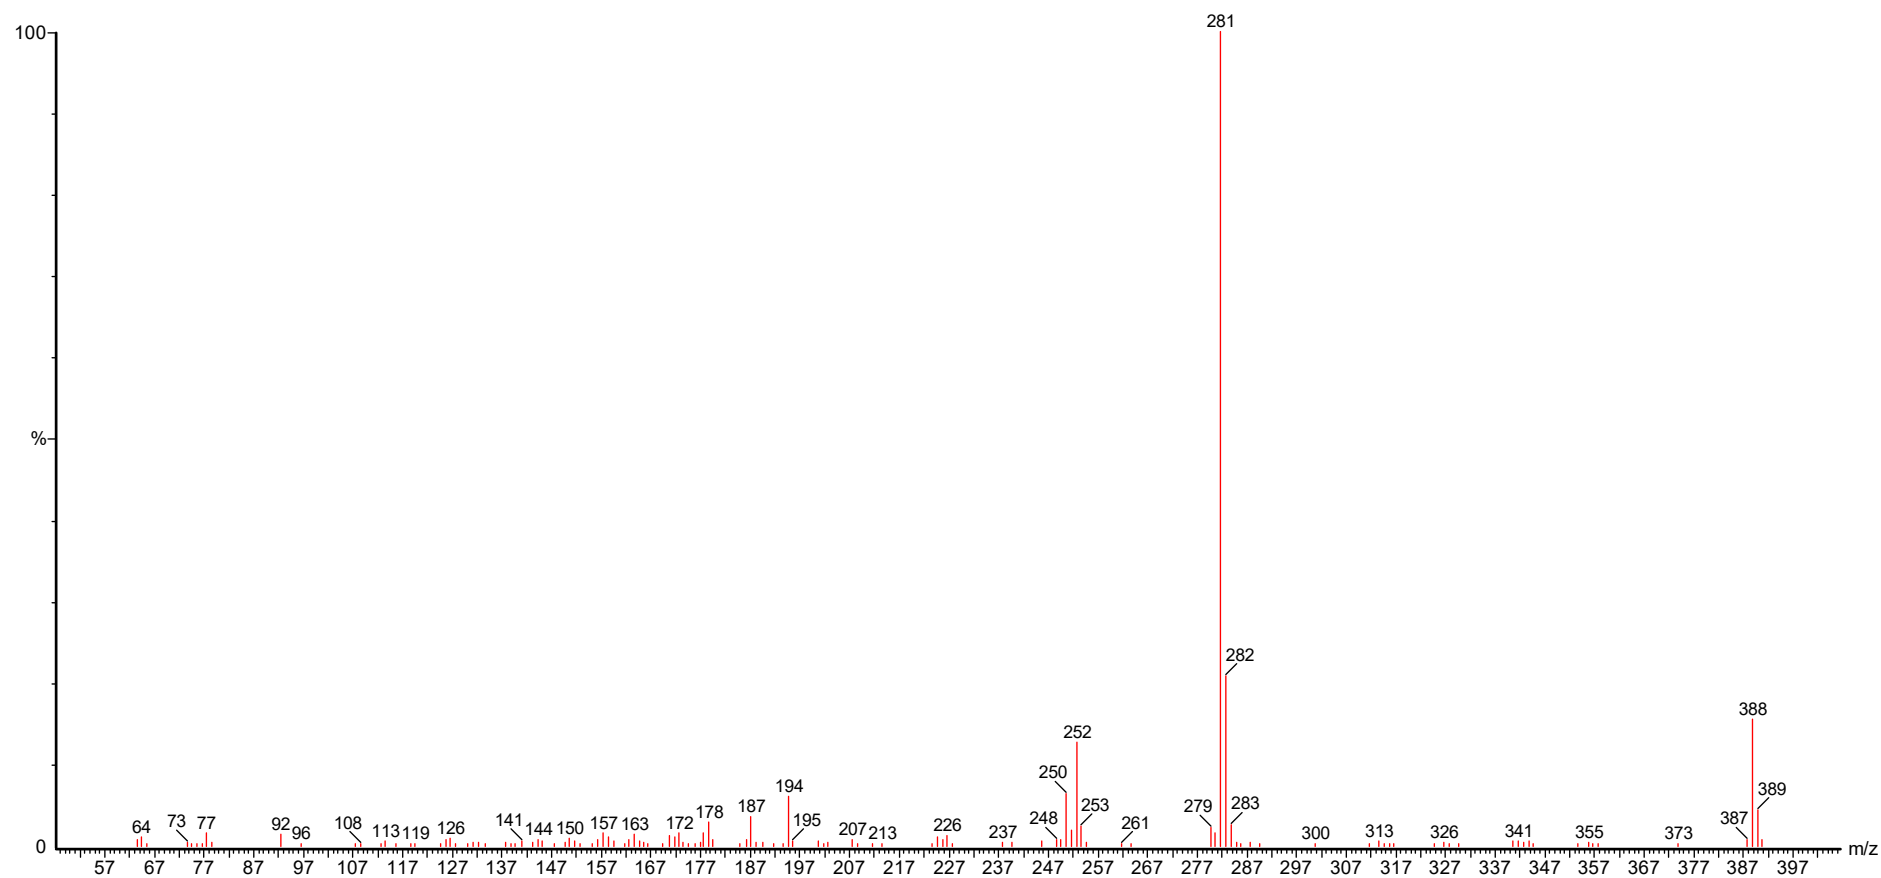

**Figure S21.** MS of compound 14-(4-Methoxyphenyl)-14H-dibenzo[a,j]xanthene 3h.

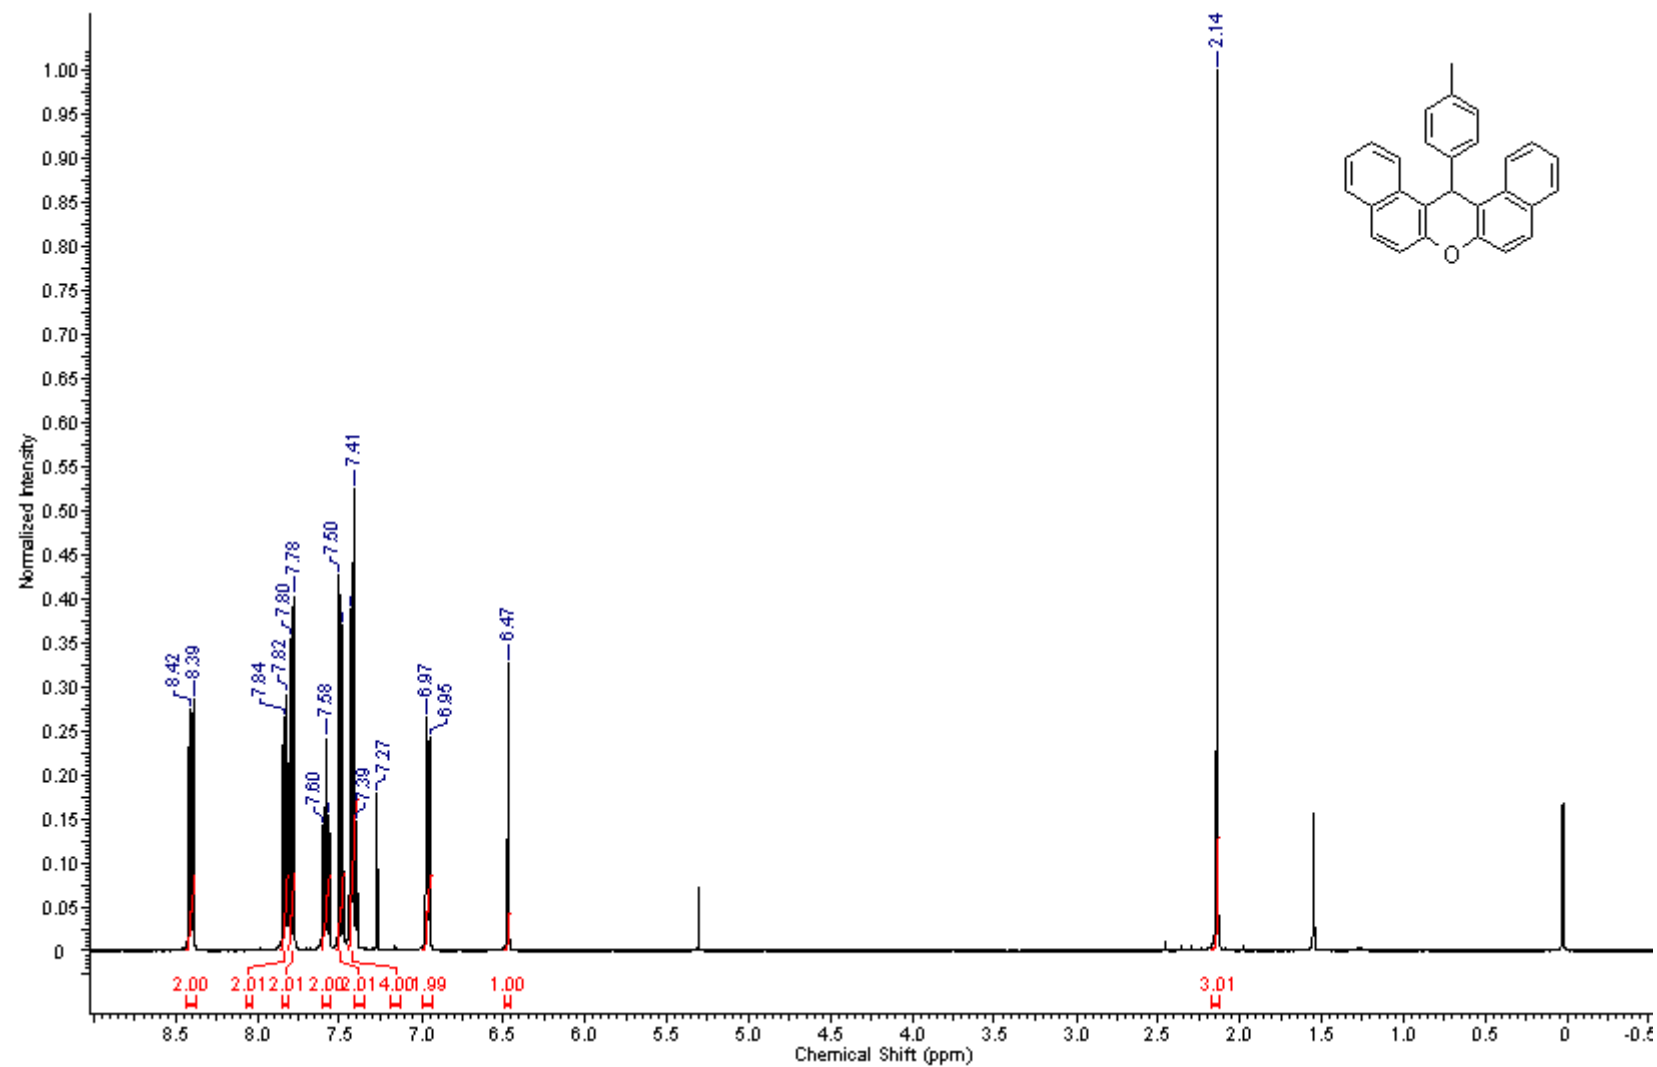

Figure S22.  $^1\text{H}$  NMR of compound 14-(4-Methylphenyl)-14H-dibenzo[*a,j*]xanthene 3i.



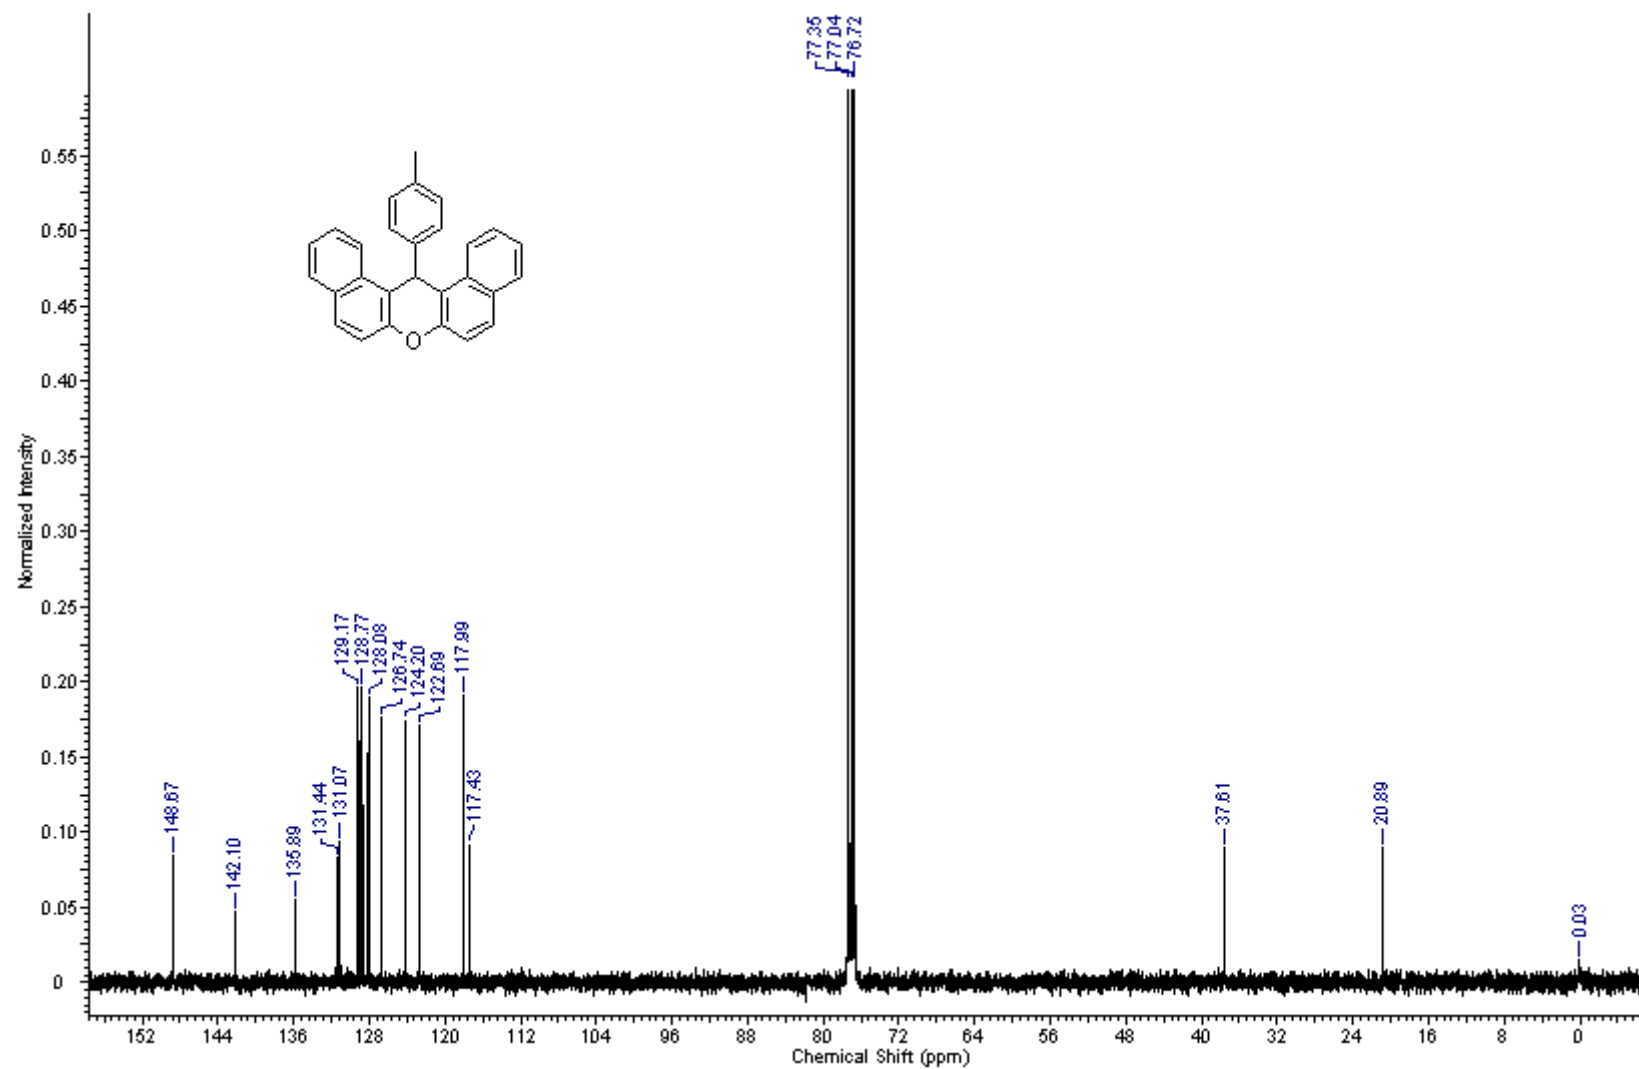

Figure S23. <sup>13</sup>C NMR of compound 14-(4-Methylphenyl)-14H-dibenzo[a,j]xanthene 3i.

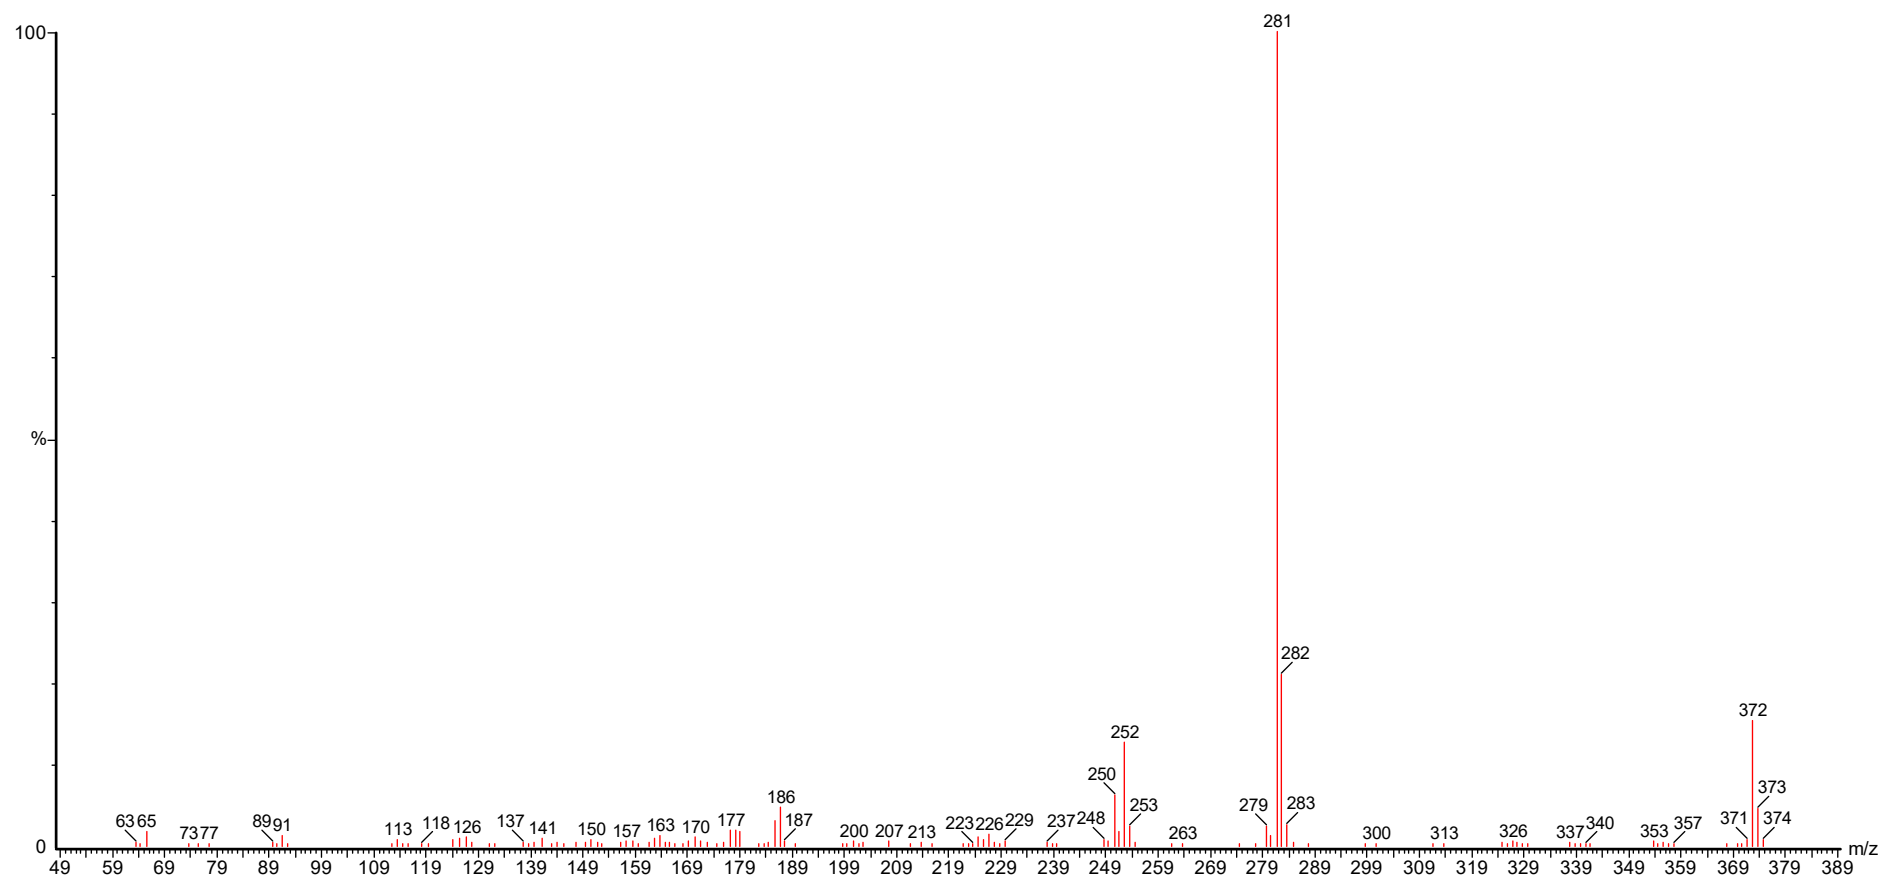

**Figure S24.** MS of compound 14-(4-Methylphenyl)-14H-dibenzo[a,j]xanthene 3i.

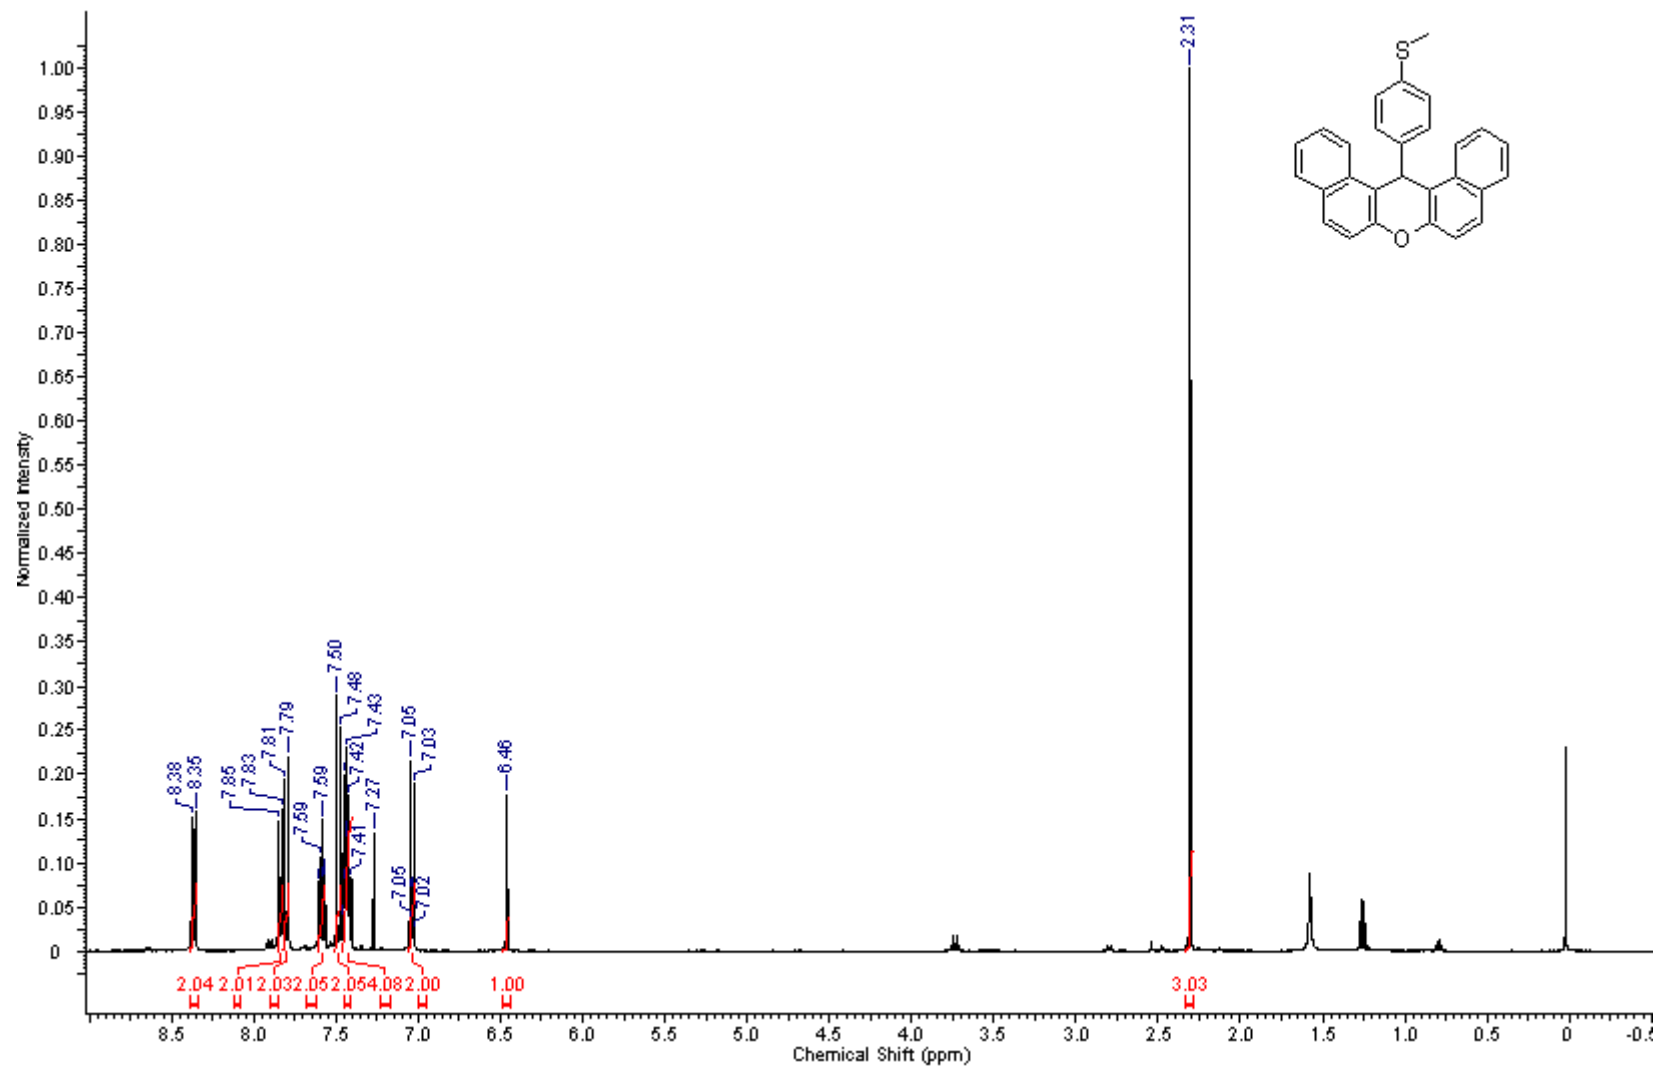

Figure S25.  $^1\text{H}$  NMR of compound 14-(4-Methylthiophenyl)-14H-dibenzo[*a,j*]xanthene 3k.

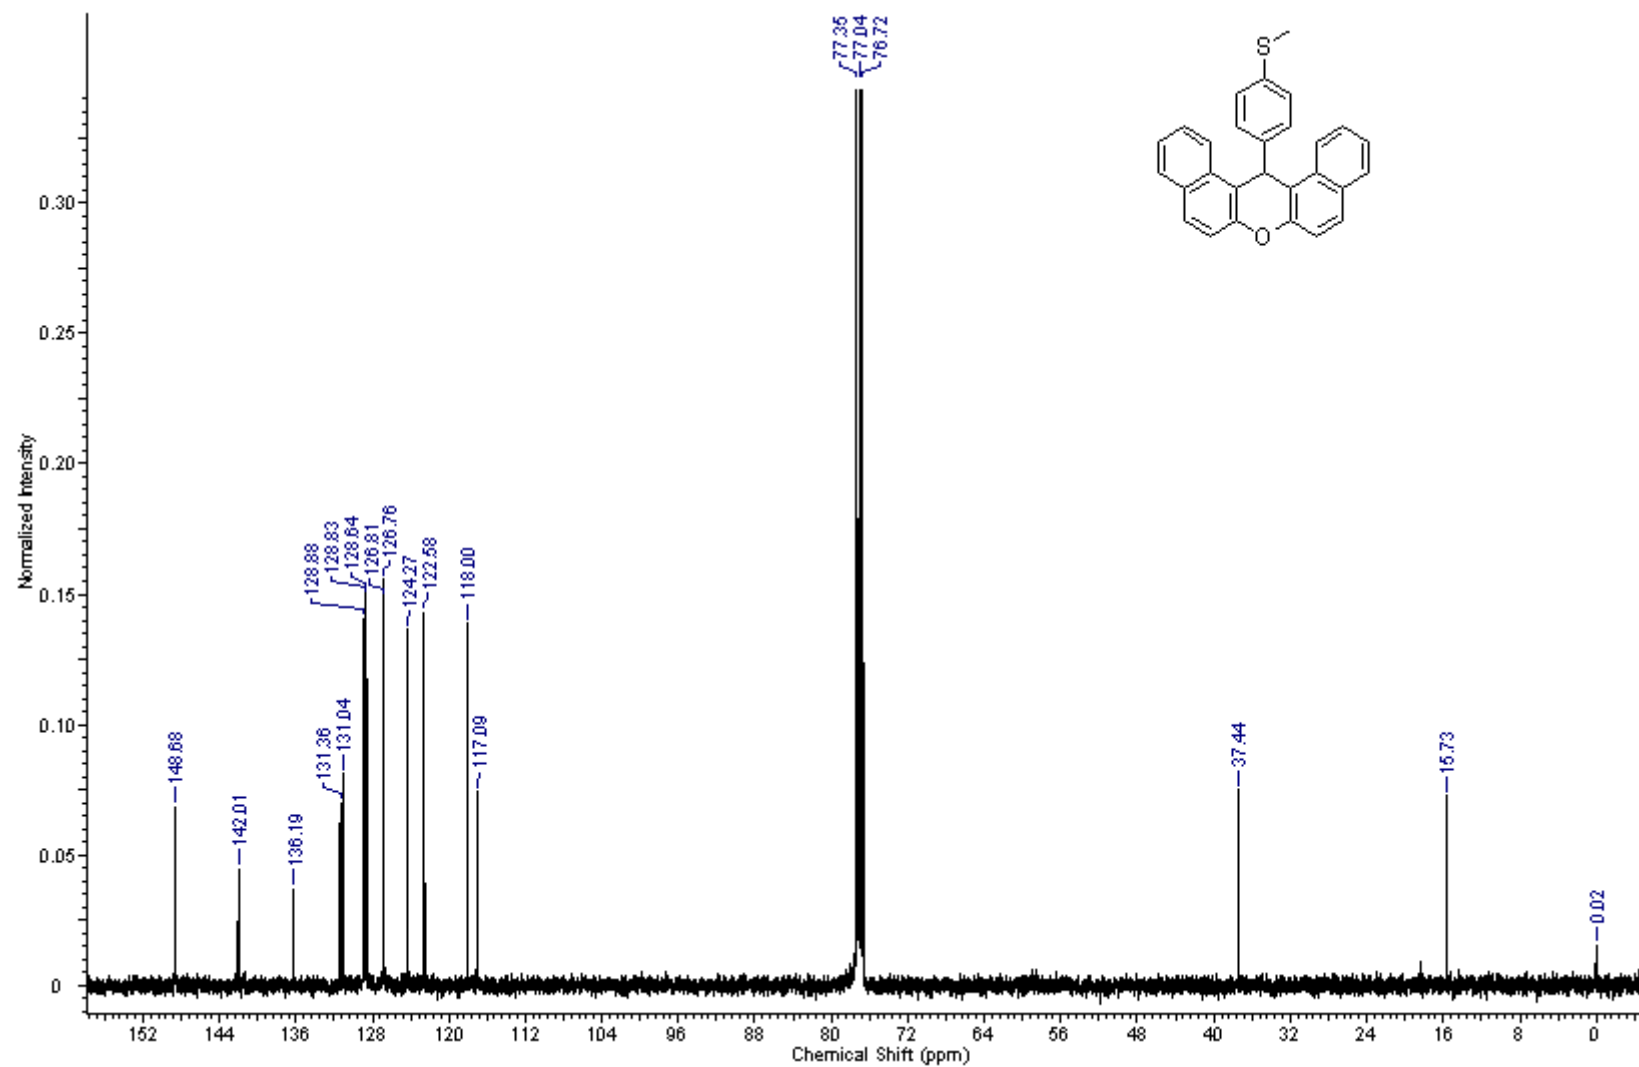

**Figure S26.** <sup>13</sup>C NMR of compound 14-(4-Methylthiophenyl)-14H-dibenzo[*a,j*]xanthene 3k.

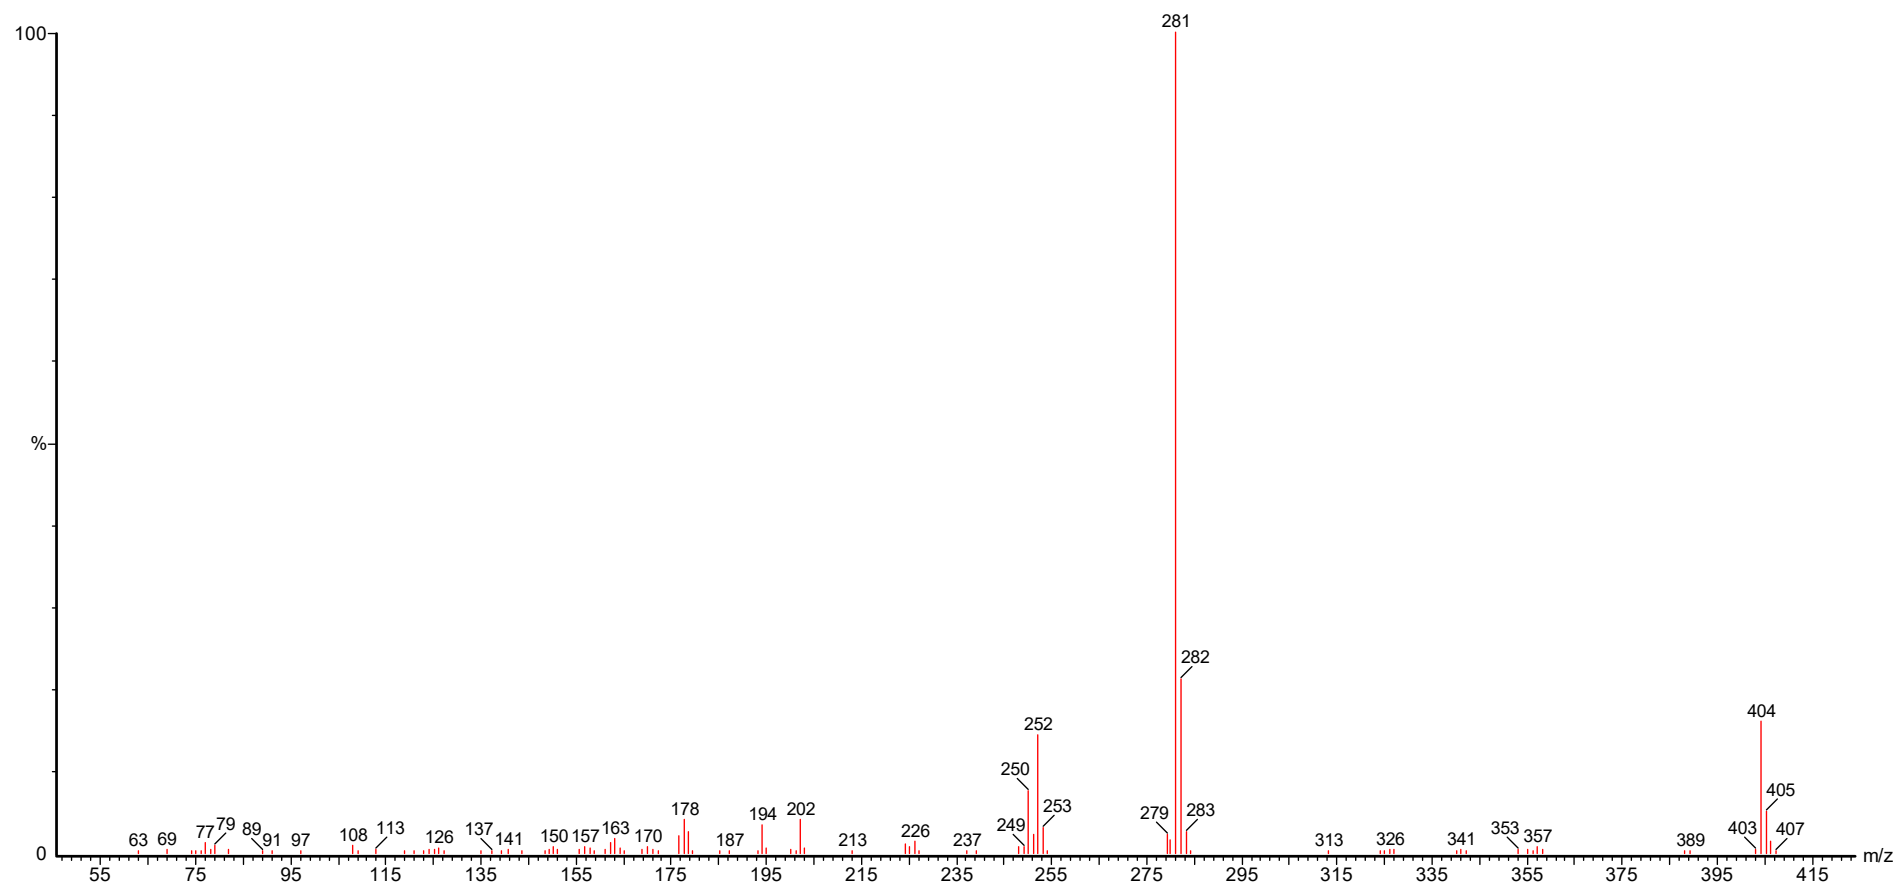

**Figure S27.** MS of compound 14-(4-Methylthiophenyl)-14H-dibenzo[a,j]xanthene 3k.

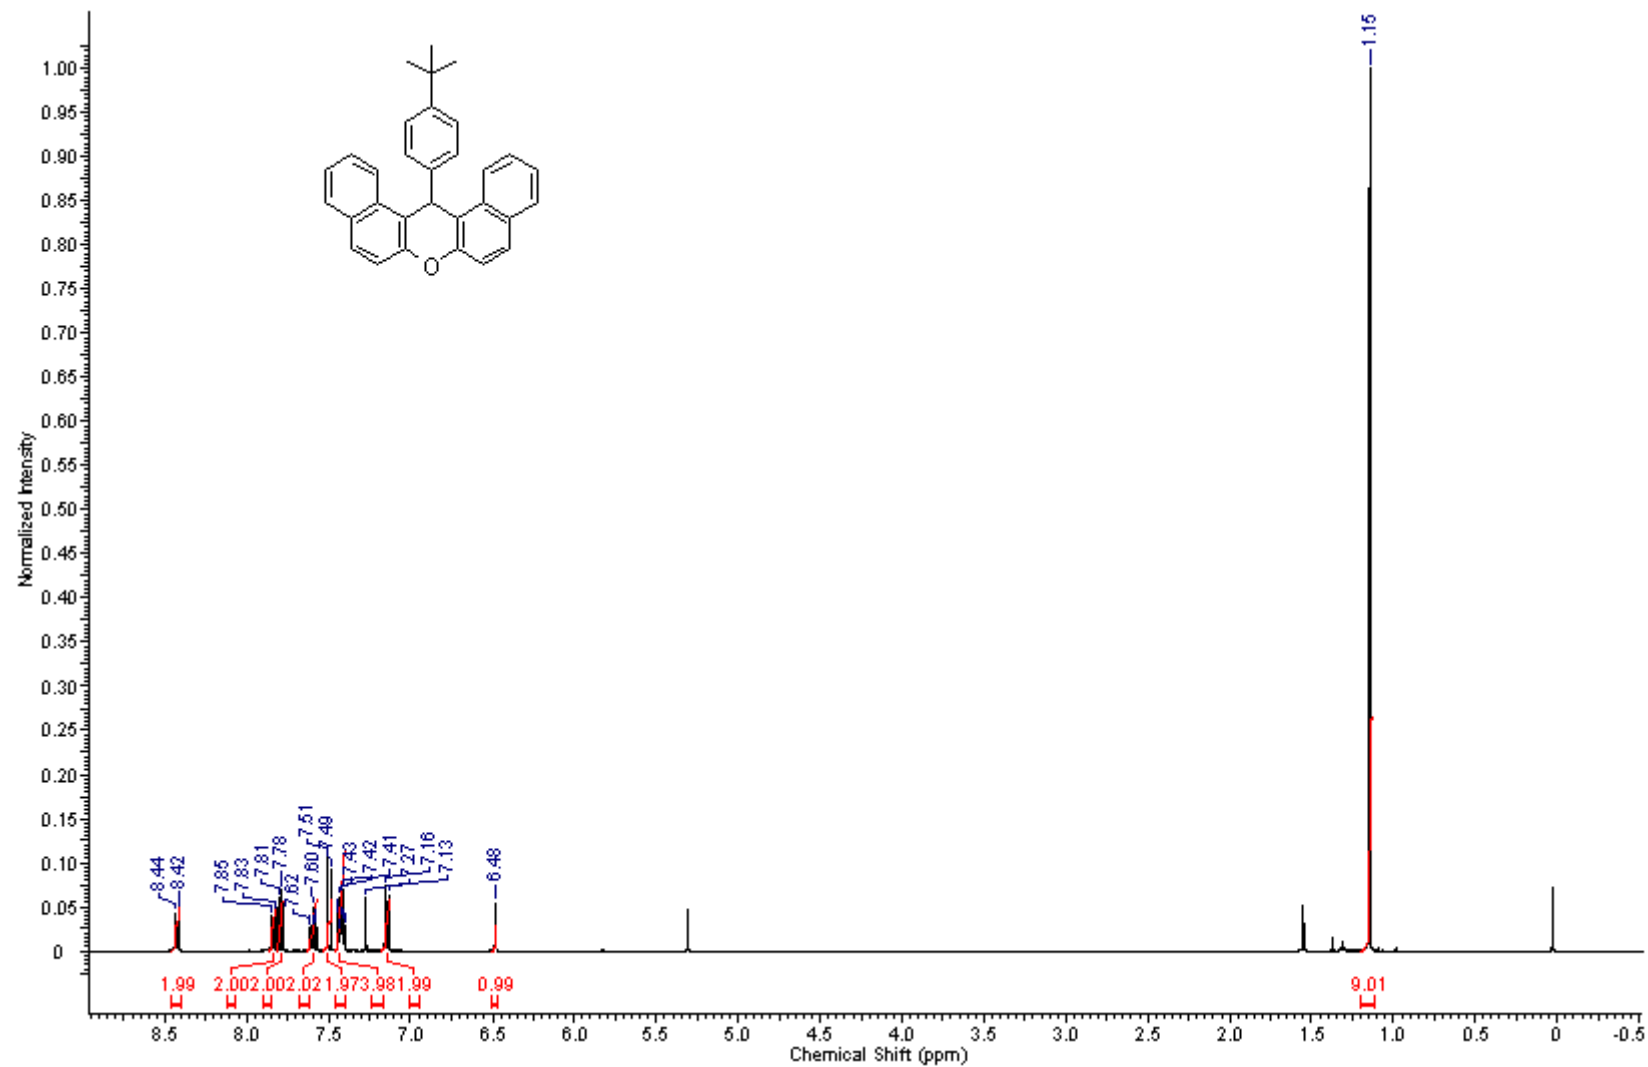

Figure S28. <sup>1</sup>H NMR of compound 14-(4-*t*-Butylphenyl)-14*H*-dibenzo[*a,j*]xanthene 3l.

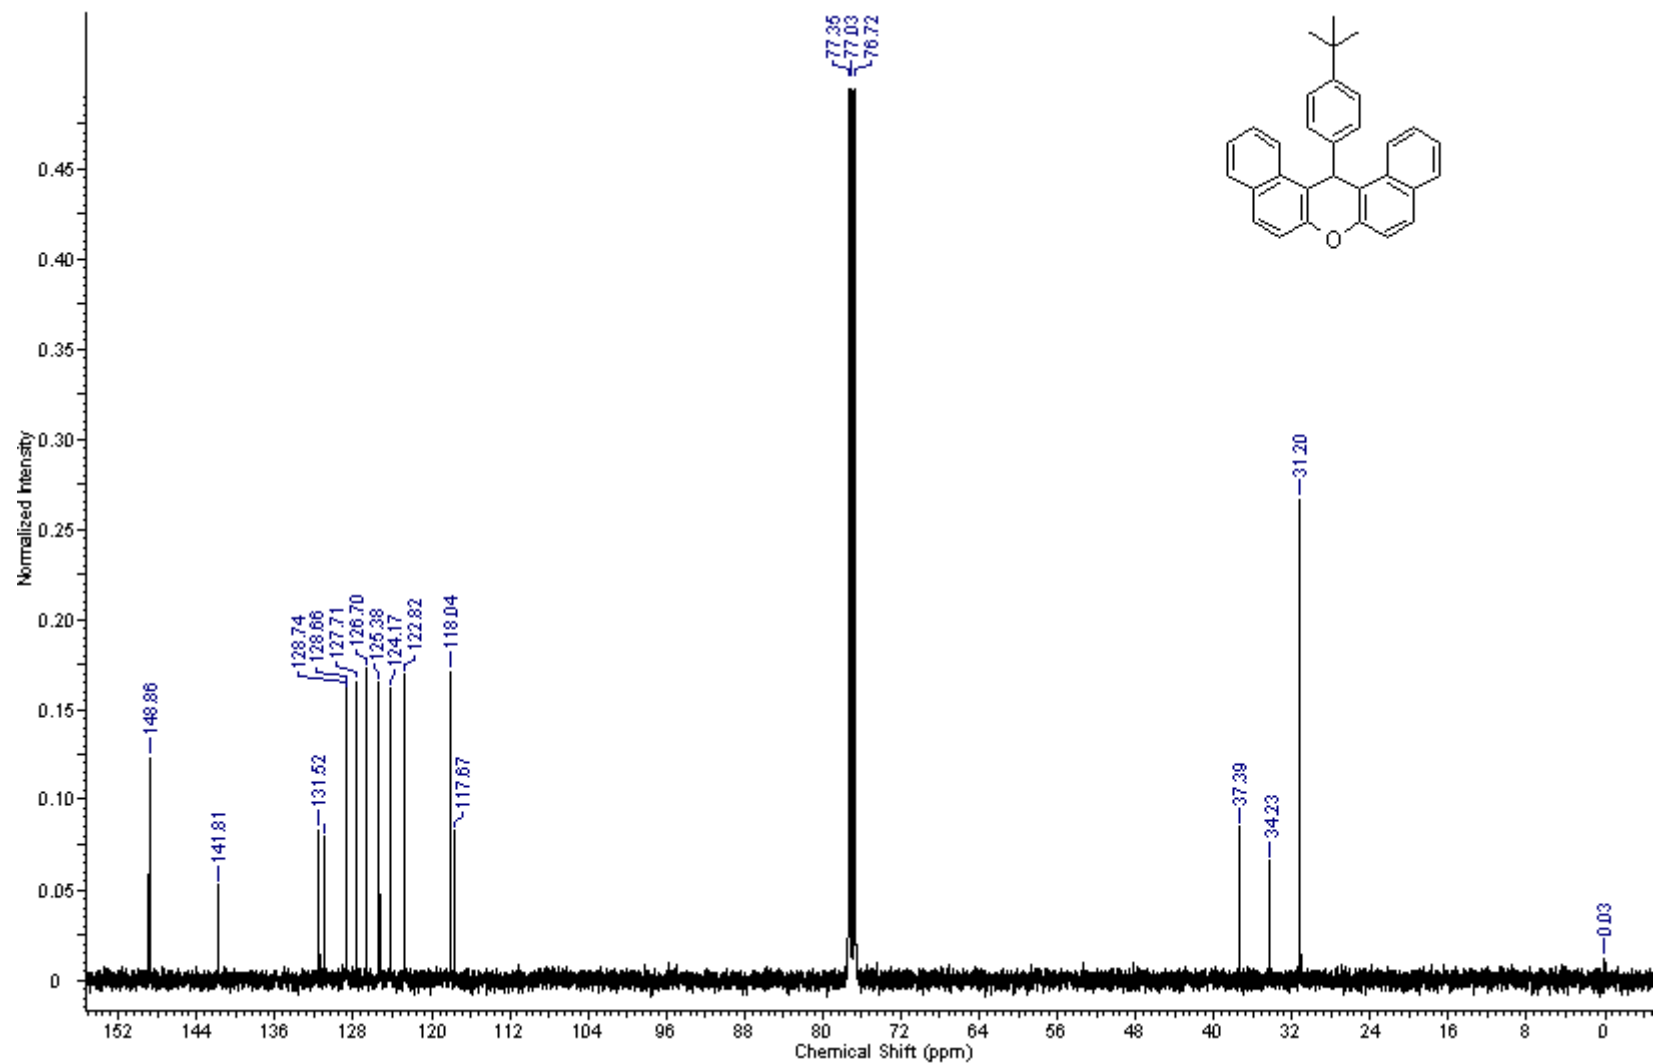

**Figure S29.** <sup>13</sup>C NMR of compound 14-(4-*t*-Butylphenyl)-14*H*-dibenzo[*a,j*]xanthene 3l.

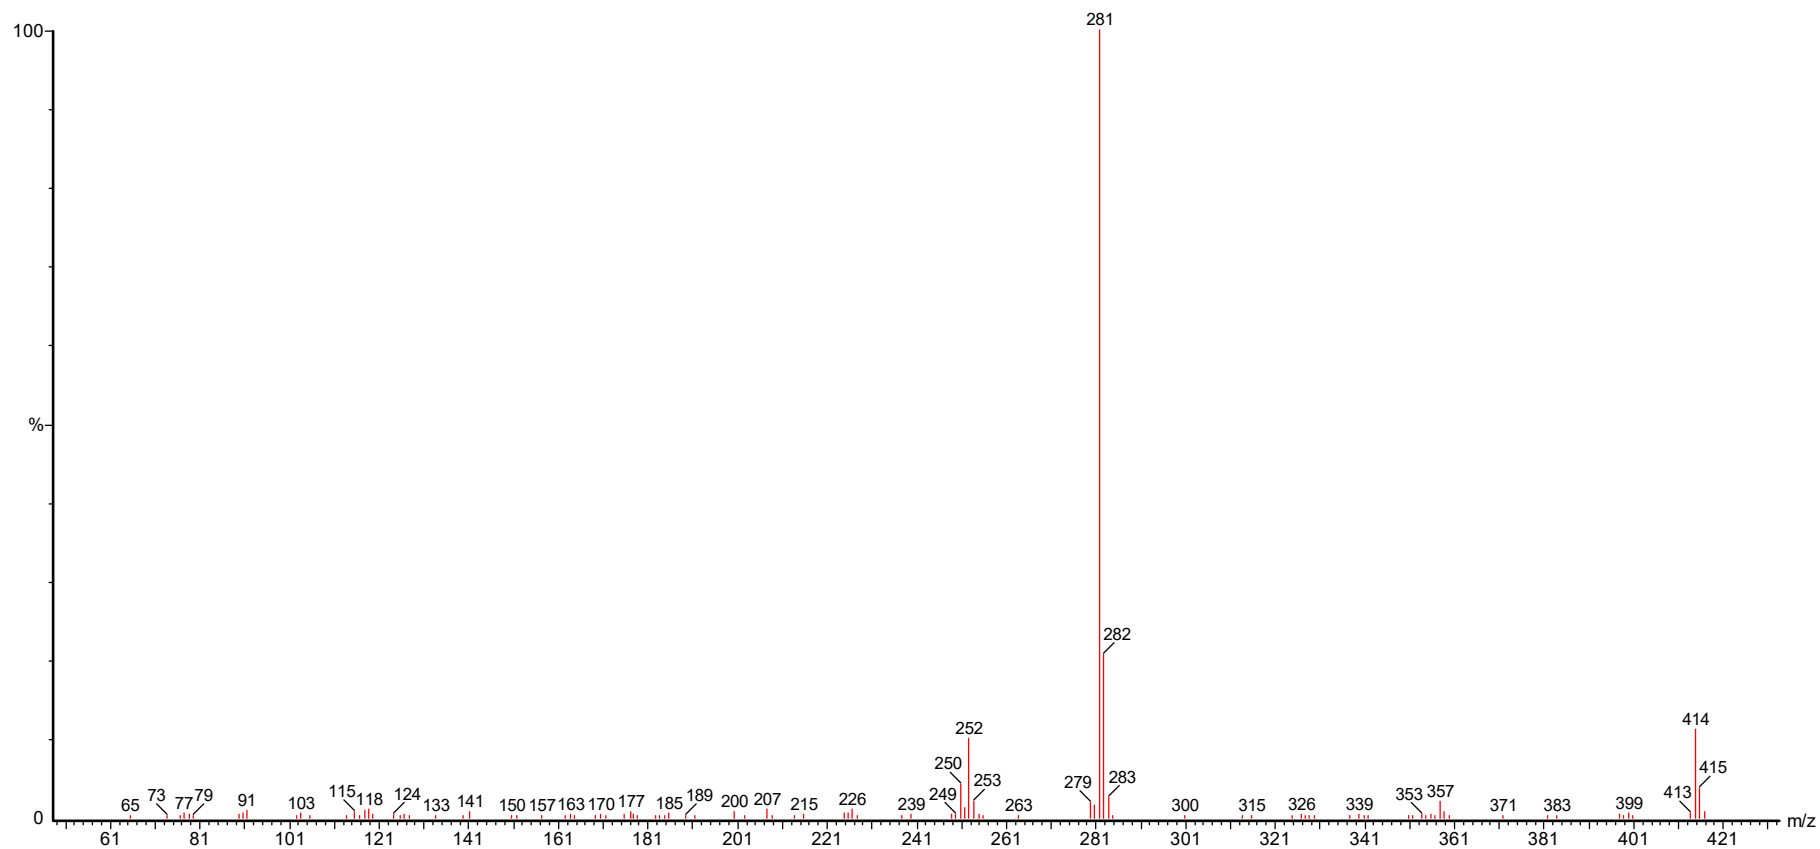

**Figure S30.** MS of compound 14-(4-*t*-Butylphenyl)-14*H*-dibenzo[*a,j*]xanthene 3l.



**Table S2.** DFT reaction mechanism study for the transformation of the aldehyde and 2-naphthol to xanthene derivatives.

| Contents        | Title                                                                                                                                                                                                                                        | Page No. |
|-----------------|----------------------------------------------------------------------------------------------------------------------------------------------------------------------------------------------------------------------------------------------|----------|
| <b>Figure 1</b> | Transition state structures of the 3b molecule transformation to the xanthene derivative optimized at M06-2X/6-31G(d,p) level of theory. The key bond distances in Å and the total energies (TE) in Hartrees are given for all five figures. | 2        |
| <b>Figure 2</b> | Transition state structures of the 3j molecule transformation to the xanthene derivative optimized at M06-2X/6-31G(d,p) level of theory. The key bond distances in Å and the total energies (TE) in Hartrees are given for all five figures. | 3        |
| <b>Table 1</b>  | Geometry coordinates of the reactants, products and transition states of the 3b and 3j compounds are given.                                                                                                                                  | 4        |

**3b (1\_2);** TE = -1010.76167

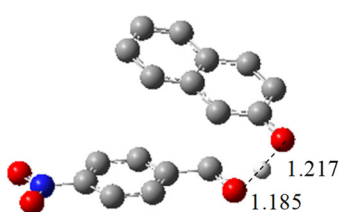

**3b (2\_3);** TE = -1010.69652

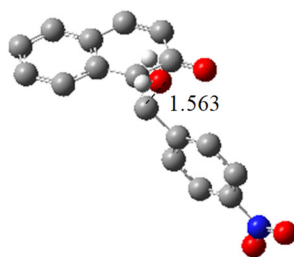

**3b (3\_4);** TE = -1395.29544

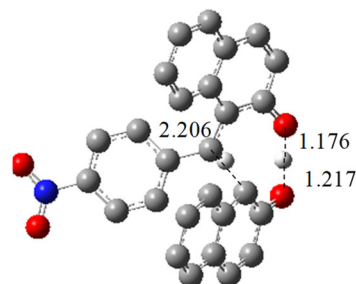

**3b (4\_5);** TE = -1395.27816

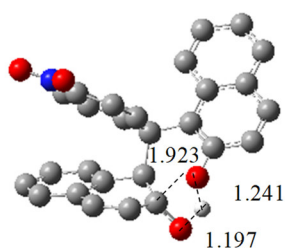

**3b (5\_6);** TE = -1395.25336

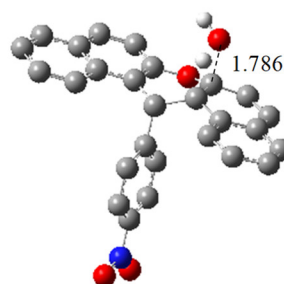

**Figure S31.** Transition state structures of the 3b molecule transformation to the xanthene derivatives optimized at the M06-2X/6-31G(d,p) level of theory. The key bond distances in Å and the total energies (TE) in Hartrees are given for all five figures.

**3j** (1\_2); TE = -940.25118

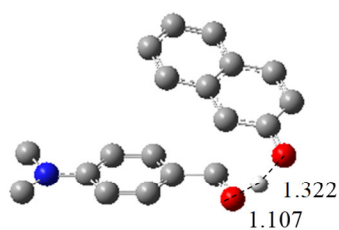

**3j** (2\_3); TE = -940.18192

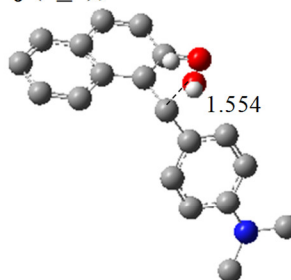

**3j** (3\_4); TE = -1324.78407

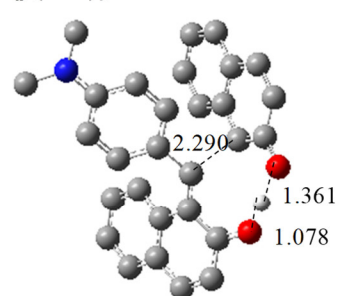

**3j** (4\_5); TE = -1324.76124

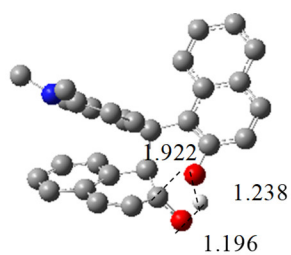

**3j** (5\_6); TE = -1324.73569

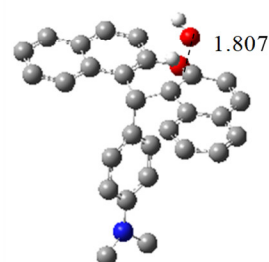

**Figure S32.** Transition state structures of the 3j molecule transformation to the xanthene derivatives optimized at the M06-2X/6-31G(d,p) level of theory. The key bond distances in Å and the total energies (TE) in Hartrees are given for all five figures.

**Table S3.** Geometry coordinates of the reactants, products and transition states of the 3b and 3j compounds are given.

| <b>3b:</b>         |   |   |           |           |           |  |
|--------------------|---|---|-----------|-----------|-----------|--|
| 1                  | 6 | 0 | 0.476467  | 1.280027  | 0.000059  |  |
| 2                  | 6 | 0 | -0.910098 | 1.377597  | -0.000007 |  |
| 3                  | 6 | 0 | -1.692643 | 0.223228  | -0.000046 |  |
| 4                  | 6 | 0 | -1.099326 | -1.042172 | -0.000019 |  |
| 5                  | 6 | 0 | 0.282458  | -1.157441 | 0.000043  |  |
| 6                  | 6 | 0 | 1.037437  | 0.010773  | 0.000081  |  |
| 7                  | 1 | 0 | 1.120736  | 2.149748  | 0.000092  |  |
| 8                  | 1 | 0 | -1.740619 | -1.917233 | -0.000052 |  |
| 9                  | 1 | 0 | 0.784905  | -2.116354 | 0.000063  |  |
| 10                 | 6 | 0 | -3.177355 | 0.336992  | -0.000131 |  |
| 11                 | 8 | 0 | -3.917605 | -0.615488 | 0.000060  |  |
| 12                 | 1 | 0 | -3.571377 | 1.373990  | 0.000054  |  |
| 13                 | 1 | 0 | -1.387188 | 2.353760  | -0.000028 |  |
| 14                 | 7 | 0 | 2.509214  | -0.104252 | 0.000151  |  |
| 15                 | 8 | 0 | 2.982362  | -1.224264 | -0.000103 |  |
| 16                 | 8 | 0 | 3.151168  | 0.928730  | -0.000090 |  |
|                    |   |   |           |           |           |  |
| <b>2-Naphthol:</b> |   |   |           |           |           |  |
| 1                  | 6 | 0 | -1.306973 | 1.455500  | -0.980556 |  |
| 2                  | 6 | 0 | 0.065677  | 1.473321  | -0.944928 |  |
| 3                  | 6 | 0 | 0.763353  | 2.704154  | -0.895367 |  |
| 4                  | 6 | 0 | 0.032741  | 3.926382  | -0.882629 |  |
| 5                  | 6 | 0 | -1.383741 | 3.869435  | -0.920139 |  |
| 6                  | 6 | 0 | -2.041116 | 2.668911  | -0.967891 |  |
| 7                  | 1 | 0 | 2.742295  | 1.829558  | -0.867322 |  |
| 8                  | 1 | 0 | 0.608033  | 0.533522  | -0.955010 |  |
| 9                  | 6 | 0 | 2.183452  | 2.761019  | -0.857587 |  |
| 10                 | 6 | 0 | 0.737538  | 5.157542  | -0.832863 |  |
| 11                 | 1 | 0 | -1.947317 | 4.798163  | -0.910372 |  |
| 12                 | 1 | 0 | -3.127771 | 2.636305  | -0.996351 |  |
| 13                 | 6 | 0 | 2.107003  | 5.180101  | -0.797250 |  |
| 14                 | 6 | 0 | 2.836002  | 3.964879  | -0.809964 |  |
| 15                 | 1 | 0 | 0.168088  | 6.083123  | -0.823520 |  |
| 16                 | 1 | 0 | 2.637972  | 6.125426  | -0.759124 |  |
| 17                 | 1 | 0 | 3.920649  | 3.992101  | -0.781550 |  |
| 18                 | 8 | 0 | -1.937291 | 0.250071  | -1.027846 |  |
| 19                 | 1 | 0 | -2.890571 | 0.386673  | -1.047760 |  |
|                    |   |   |           |           |           |  |
| <b>3b (2):</b>     |   |   |           |           |           |  |
| 1                  | 6 | 0 | 1.355083  | 1.790522  | 1.152620  |  |
| 2                  | 6 | 0 | 1.968740  | 1.217406  | -0.113914 |  |
| 3                  | 6 | 0 | 2.333789  | -0.241465 | -0.060241 |  |
| 4                  | 6 | 0 | 1.868841  | -1.053570 | 0.986871  |  |

|         |   |   |           |           |           |
|---------|---|---|-----------|-----------|-----------|
| 5       | 6 | 0 | 1.125722  | -0.453517 | 2.091972  |
| 6       | 6 | 0 | 0.894524  | 0.866620  | 2.192789  |
| 7       | 1 | 0 | 3.455434  | -0.188091 | -1.890281 |
| 8       | 6 | 0 | 3.081684  | -0.816672 | -1.085603 |
| 9       | 6 | 0 | 2.138422  | -2.426562 | 0.973604  |
| 10      | 1 | 0 | 0.769522  | -1.126163 | 2.869011  |
| 11      | 1 | 0 | 0.363865  | 1.305285  | 3.030429  |
| 12      | 6 | 0 | 2.869192  | -2.992888 | -0.062211 |
| 13      | 6 | 0 | 3.349688  | -2.182958 | -1.090359 |
| 14      | 1 | 0 | 1.768959  | -3.046020 | 1.786077  |
| 15      | 1 | 0 | 3.071686  | -4.058387 | -0.066485 |
| 16      | 1 | 0 | 3.933348  | -2.615441 | -1.896239 |
| 17      | 8 | 0 | 1.172944  | 2.999186  | 1.238675  |
| 18      | 6 | 0 | 0.939896  | 1.513410  | -1.272046 |
| 19      | 8 | 0 | 0.848226  | 2.888392  | -1.500514 |
| 20      | 1 | 0 | 0.931086  | 3.340883  | -0.643718 |
| 21      | 1 | 0 | 2.847745  | 1.822797  | -0.362772 |
| 22      | 6 | 0 | -0.405671 | 0.870288  | -0.969201 |
| 23      | 6 | 0 | -1.443277 | 1.638239  | -0.436353 |
| 24      | 6 | 0 | -0.598510 | -0.499611 | -1.177136 |
| 25      | 6 | 0 | -2.651408 | 1.048771  | -0.085661 |
| 26      | 1 | 0 | -1.300288 | 2.704784  | -0.304874 |
| 27      | 6 | 0 | -1.798780 | -1.105906 | -0.831411 |
| 28      | 6 | 0 | -2.801221 | -0.316458 | -0.284025 |
| 29      | 1 | 0 | -3.470175 | 1.621285  | 0.331724  |
| 30      | 1 | 0 | -1.972718 | -2.164042 | -0.980358 |
| 31      | 1 | 0 | 1.349312  | 1.055773  | -2.180402 |
| 32      | 1 | 0 | 0.198041  | -1.098623 | -1.609800 |
| 33      | 7 | 0 | -4.073472 | -0.951438 | 0.091370  |
| 34      | 8 | 0 | -4.177991 | -2.151772 | -0.085872 |
| 35      | 8 | 0 | -4.942154 | -0.239290 | 0.560203  |
|         |   |   |           |           |           |
| 3b (3): |   |   |           |           |           |
| 1       | 6 | 0 | -2.304297 | 2.203621  | -1.760401 |
| 2       | 6 | 0 | -0.892182 | 2.484001  | -1.335877 |
| 3       | 6 | 0 | -0.671355 | 3.609992  | -0.399561 |
| 4       | 6 | 0 | -1.756052 | 4.106079  | 0.352745  |
| 5       | 6 | 0 | -3.092053 | 3.565776  | 0.130186  |
| 6       | 6 | 0 | -3.357164 | 2.683193  | -0.845009 |
| 7       | 1 | 0 | 1.414511  | 3.887775  | -0.856594 |
| 8       | 6 | 0 | 0.583462  | 4.205817  | -0.235294 |
| 9       | 6 | 0 | -1.551639 | 5.132525  | 1.279756  |
| 10      | 1 | 0 | -3.893344 | 3.941088  | 0.762512  |
| 11      | 1 | 0 | -4.359580 | 2.326421  | -1.054249 |
| 12      | 6 | 0 | -0.292892 | 5.690023  | 1.455361  |
| 13      | 6 | 0 | 0.773921  | 5.229773  | 0.685084  |
| 14      | 1 | 0 | -2.397218 | 5.495307  | 1.857449  |

|                |   |   |           |           |           |
|----------------|---|---|-----------|-----------|-----------|
| 15             | 1 | 0 | -0.145154 | 6.489288  | 2.173508  |
| 16             | 1 | 0 | 1.755730  | 5.678905  | 0.791880  |
| 17             | 8 | 0 | -2.597894 | 1.580614  | -2.766639 |
| 18             | 6 | 0 | 0.128740  | 1.633586  | -1.602586 |
| 19             | 1 | 0 | 1.041878  | 1.815220  | -1.036402 |
| 20             | 6 | 0 | 0.224401  | 0.429724  | -2.442407 |
| 21             | 6 | 0 | 1.001386  | -0.628060 | -1.936602 |
| 22             | 6 | 0 | -0.324324 | 0.312179  | -3.727797 |
| 23             | 6 | 0 | 1.183006  | -1.796858 | -2.657169 |
| 24             | 6 | 0 | -0.133454 | -0.846299 | -4.470655 |
| 25             | 1 | 0 | -0.898399 | 1.128744  | -4.139052 |
| 26             | 6 | 0 | 0.605370  | -1.881131 | -3.917483 |
| 27             | 1 | 0 | 1.761656  | -2.627662 | -2.274340 |
| 28             | 1 | 0 | -0.545361 | -0.957060 | -5.465647 |
| 29             | 1 | 0 | 1.455423  | -0.530789 | -0.954961 |
| 30             | 7 | 0 | 0.802804  | -3.110678 | -4.702093 |
| 31             | 8 | 0 | 0.298946  | -3.159324 | -5.808540 |
| 32             | 8 | 0 | 1.458889  | -4.001629 | -4.193960 |
|                |   |   |           |           |           |
| <b>3b (4):</b> |   |   |           |           |           |
| 1              | 8 | 0 | 0.101966  | 0.157360  | 2.632750  |
| 2              | 6 | 0 | -0.377557 | -0.105719 | -0.152083 |
| 3              | 6 | 0 | 1.069533  | -0.583601 | -0.207777 |
| 4              | 6 | 0 | 2.139799  | 0.214272  | 0.204555  |
| 5              | 6 | 0 | 1.346491  | -1.827724 | -0.791589 |
| 6              | 6 | 0 | 3.454894  | -0.212378 | 0.049367  |
| 7              | 1 | 0 | 1.966485  | 1.188991  | 0.648668  |
| 8              | 6 | 0 | 2.648317  | -2.270518 | -0.956590 |
| 9              | 6 | 0 | 3.684617  | -1.448881 | -0.529674 |
| 10             | 1 | 0 | 4.293174  | 0.394803  | 0.366476  |
| 11             | 1 | 0 | 2.875000  | -3.231132 | -1.401352 |
| 12             | 6 | 0 | -1.192996 | -2.211881 | 1.085205  |
| 13             | 6 | 0 | -2.167878 | -3.230763 | 1.276761  |
| 14             | 6 | 0 | -1.425957 | -1.153012 | 0.221710  |
| 15             | 6 | 0 | -3.379968 | -3.161513 | 0.662423  |
| 16             | 6 | 0 | -2.722355 | -1.047189 | -0.396135 |
| 17             | 6 | 0 | -3.701575 | -2.058976 | -0.174839 |
| 18             | 6 | 0 | -0.044057 | 3.631129  | 2.067959  |
| 19             | 6 | 0 | 0.028445  | 3.677387  | 0.610666  |
| 20             | 6 | 0 | -0.135878 | 2.482997  | 2.759231  |
| 21             | 6 | 0 | 0.323174  | 4.883657  | -0.031885 |
| 22             | 6 | 0 | -0.148819 | 2.496384  | -0.139714 |
| 23             | 6 | 0 | -0.158683 | 1.196424  | 2.049379  |
| 24             | 6 | 0 | 0.461909  | 4.935875  | -1.411940 |
| 25             | 1 | 0 | 0.452684  | 5.780773  | 0.567117  |
| 26             | 6 | 0 | 0.002654  | 2.564168  | -1.523972 |
| 27             | 6 | 0 | -0.587153 | 1.232650  | 0.588580  |

|                |   |   |           |           |           |
|----------------|---|---|-----------|-----------|-----------|
| 28             | 6 | 0 | 0.309642  | 3.769166  | -2.153970 |
| 29             | 1 | 0 | 0.695210  | 5.873794  | -1.903737 |
| 30             | 1 | 0 | -0.099306 | 1.675976  | -2.137373 |
| 31             | 1 | 0 | 0.431565  | 3.789662  | -3.231823 |
| 32             | 1 | 0 | 0.040476  | 4.577777  | 2.596973  |
| 33             | 1 | 0 | -0.094927 | 2.444756  | 3.841974  |
| 34             | 1 | 0 | -0.602742 | 0.100893  | -1.201854 |
| 35             | 6 | 0 | -3.096559 | 0.040540  | -1.237367 |
| 36             | 6 | 0 | -4.342155 | 0.109266  | -1.814346 |
| 37             | 1 | 0 | -2.403567 | 0.853501  | -1.430599 |
| 38             | 6 | 0 | -5.297984 | -0.903797 | -1.594820 |
| 39             | 1 | 0 | -4.591469 | 0.956827  | -2.444907 |
| 40             | 6 | 0 | -4.974149 | -1.964600 | -0.788054 |
| 41             | 1 | 0 | -6.276709 | -0.839668 | -2.057819 |
| 42             | 1 | 0 | -5.693896 | -2.757089 | -0.601192 |
| 43             | 1 | 0 | -1.902166 | -4.043886 | 1.943090  |
| 44             | 1 | 0 | -4.123714 | -3.938227 | 0.815952  |
| 45             | 8 | 0 | -0.045946 | -2.396667 | 1.770227  |
| 46             | 1 | 0 | 0.315891  | -1.522889 | 2.004403  |
| 47             | 1 | 0 | -1.682328 | 1.347417  | 0.694313  |
| 48             | 1 | 0 | 0.521030  | -2.458633 | -1.106522 |
| 49             | 7 | 0 | 5.070815  | -1.904814 | -0.701566 |
| 50             | 8 | 0 | 5.245610  | -2.992776 | -1.219162 |
| 51             | 8 | 0 | 5.959504  | -1.165432 | -0.318478 |
| <b>3b (5):</b> |   |   |           |           |           |
| 1              | 8 | 0 | 1.098836  | -1.282713 | -2.094655 |
| 2              | 6 | 0 | 0.578170  | -0.494788 | 0.537965  |
| 3              | 6 | 0 | -0.387636 | 0.652089  | 0.275064  |
| 4              | 6 | 0 | -1.448351 | 0.874293  | 1.161192  |
| 5              | 6 | 0 | -0.261077 | 1.473070  | -0.850089 |
| 6              | 6 | 0 | -2.380923 | 1.875440  | 0.924097  |
| 7              | 6 | 0 | -1.180247 | 2.482631  | -1.102127 |
| 8              | 1 | 0 | 0.563225  | 1.317539  | -1.538151 |
| 9              | 6 | 0 | -2.228894 | 2.659881  | -0.210413 |
| 10             | 1 | 0 | -3.210874 | 2.057491  | 1.594961  |
| 11             | 1 | 0 | -1.100903 | 3.126878  | -1.968609 |
| 12             | 6 | 0 | 0.031223  | -1.998220 | -1.463409 |
| 13             | 6 | 0 | -1.239822 | -1.472503 | -2.086916 |
| 14             | 6 | 0 | 0.049702  | -1.879928 | 0.060701  |
| 15             | 6 | 0 | -2.396109 | -1.500176 | -1.422209 |
| 16             | 6 | 0 | -1.289031 | -2.217900 | 0.673761  |
| 17             | 6 | 0 | -2.475711 | -1.978095 | -0.037771 |
| 18             | 6 | 0 | 4.435416  | -0.098011 | -1.365736 |
| 19             | 6 | 0 | 4.286341  | 0.436875  | -0.057600 |
| 20             | 6 | 0 | 3.383255  | -0.687344 | -2.008297 |
| 21             | 6 | 0 | 5.366011  | 1.072075  | 0.606725  |

|                |   |   |           |           |           |
|----------------|---|---|-----------|-----------|-----------|
| 22             | 6 | 0 | 3.021346  | 0.345519  | 0.591837  |
| 23             | 6 | 0 | 2.131634  | -0.778755 | -1.353766 |
| 24             | 6 | 0 | 5.204385  | 1.614191  | 1.855323  |
| 25             | 1 | 0 | 6.325920  | 1.125606  | 0.100333  |
| 26             | 6 | 0 | 2.881397  | 0.931748  | 1.878826  |
| 27             | 6 | 0 | 1.940482  | -0.300437 | -0.078417 |
| 28             | 6 | 0 | 3.943227  | 1.548617  | 2.491112  |
| 29             | 1 | 0 | 6.035733  | 2.101028  | 2.353912  |
| 30             | 1 | 0 | 1.916142  | 0.913992  | 2.374316  |
| 31             | 1 | 0 | 3.813525  | 1.995907  | 3.471337  |
| 32             | 1 | 0 | 5.403455  | -0.024472 | -1.852862 |
| 33             | 1 | 0 | 3.469740  | -1.090765 | -3.010815 |
| 34             | 1 | 0 | 0.683287  | -0.592049 | 1.623833  |
| 35             | 6 | 0 | -1.359350 | -2.672734 | 1.987337  |
| 36             | 6 | 0 | -2.590933 | -2.881318 | 2.604761  |
| 37             | 1 | 0 | -0.438189 | -2.863960 | 2.533148  |
| 38             | 6 | 0 | -3.768238 | -2.630613 | 1.904194  |
| 39             | 1 | 0 | -2.630080 | -3.239762 | 3.628117  |
| 40             | 6 | 0 | -3.707120 | -2.183701 | 0.589001  |
| 41             | 1 | 0 | -4.730518 | -2.787239 | 2.380108  |
| 42             | 1 | 0 | -4.621426 | -1.989550 | 0.035023  |
| 43             | 1 | 0 | -1.162311 | -1.108043 | -3.107362 |
| 44             | 1 | 0 | -3.315124 | -1.163575 | -1.894840 |
| 45             | 8 | 0 | 0.198135  | -3.361733 | -1.730970 |
| 46             | 1 | 0 | 0.058463  | -3.499690 | -2.676642 |
| 47             | 1 | 0 | 0.788172  | -2.615427 | 0.399578  |
| 48             | 1 | 0 | -1.554658 | 0.243058  | 2.039123  |
| 49             | 7 | 0 | -3.211103 | 3.721424  | -0.473186 |
| 50             | 8 | 0 | -3.057784 | 4.396659  | -1.474868 |
| 51             | 8 | 0 | -4.120527 | 3.859240  | 0.325109  |
| <b>3b (6):</b> |   |   |           |           |           |
| 1              | 8 | 0 | -0.000160 | -2.298183 | -1.849204 |
| 2              | 6 | 0 | -0.000053 | -0.631992 | 0.503191  |
| 3              | 6 | 0 | 0.000050  | 0.857651  | 0.158654  |
| 4              | 6 | 0 | 0.000185  | 1.840164  | 1.149624  |
| 5              | 6 | 0 | 0.000031  | 1.245999  | -1.185371 |
| 6              | 6 | 0 | 0.000287  | 3.190576  | 0.818689  |
| 7              | 6 | 0 | 0.000132  | 2.586770  | -1.538483 |
| 8              | 1 | 0 | -0.000067 | 0.484395  | -1.960691 |
| 9              | 6 | 0 | 0.000258  | 3.536239  | -0.523535 |
| 10             | 1 | 0 | 0.000390  | 3.968565  | 1.571588  |
| 11             | 1 | 0 | 0.000115  | 2.910059  | -2.571753 |
| 12             | 6 | 0 | -1.175135 | -2.054655 | -1.189248 |
| 13             | 6 | 0 | -2.314580 | -2.645734 | -1.787695 |
| 14             | 6 | 0 | -1.246237 | -1.303417 | -0.042769 |
| 15             | 6 | 0 | -3.537652 | -2.479595 | -1.209246 |

|                  |   |   |           |           |           |
|------------------|---|---|-----------|-----------|-----------|
| 16               | 6 | 0 | -2.526169 | -1.126939 | 0.574978  |
| 17               | 6 | 0 | -3.678090 | -1.723983 | -0.012519 |
| 18               | 6 | 0 | 3.537307  | -2.480056 | -1.209234 |
| 19               | 6 | 0 | 3.677842  | -1.724445 | -0.012518 |
| 20               | 6 | 0 | 2.314215  | -2.646042 | -1.787684 |
| 21               | 6 | 0 | 4.944294  | -1.554359 | 0.598815  |
| 22               | 6 | 0 | 2.525997  | -1.127247 | 0.574973  |
| 23               | 6 | 0 | 1.174845  | -2.054813 | -1.189243 |
| 24               | 6 | 0 | 5.079807  | -0.819904 | 1.749075  |
| 25               | 1 | 0 | 5.809201  | -2.020103 | 0.134539  |
| 26               | 6 | 0 | 2.701926  | -0.369106 | 1.762379  |
| 27               | 6 | 0 | 1.246041  | -1.303579 | -0.042767 |
| 28               | 6 | 0 | 3.942132  | -0.222166 | 2.333442  |
| 29               | 1 | 0 | 6.053956  | -0.694535 | 2.209401  |
| 30               | 1 | 0 | 1.847315  | 0.108087  | 2.226912  |
| 31               | 1 | 0 | 4.049641  | 0.361899  | 3.241697  |
| 32               | 1 | 0 | 4.421306  | -2.927738 | -1.653556 |
| 33               | 1 | 0 | 2.172999  | -3.224284 | -2.693750 |
| 34               | 1 | 0 | -0.000057 | -0.729678 | 1.595280  |
| 35               | 6 | 0 | -2.702001 | -0.368807 | 1.762405  |
| 36               | 6 | 0 | -3.942187 | -0.221724 | 2.333474  |
| 37               | 1 | 0 | -1.847329 | 0.108262  | 2.226952  |
| 38               | 6 | 0 | -5.079939 | -0.819302 | 1.749094  |
| 39               | 1 | 0 | -4.049621 | 0.362332  | 3.241743  |
| 40               | 6 | 0 | -4.944520 | -1.553750 | 0.598819  |
| 41               | 1 | 0 | -6.054071 | -0.693821 | 2.209425  |
| 42               | 1 | 0 | -5.809486 | -2.019378 | 0.134536  |
| 43               | 1 | 0 | -2.173438 | -3.223989 | -2.693764 |
| 44               | 1 | 0 | -4.421708 | -2.927162 | -1.653572 |
| 45               | 1 | 0 | 0.000211  | 1.551390  | 2.197678  |
| 46               | 7 | 0 | 0.000368  | 4.961015  | -0.885809 |
| 47               | 8 | 0 | 0.000324  | 5.240592  | -2.070519 |
| 48               | 8 | 0 | 0.000507  | 5.773077  | 0.021499  |
|                  |   |   |           |           |           |
| <b>H2O:</b>      |   |   |           |           |           |
| 1                | 8 | 0 | -0.796312 | 0.972645  | 0.000000  |
| 2                | 1 | 0 | 0.164426  | 1.014868  | 0.000000  |
| 3                | 1 | 0 | -1.077212 | 1.892371  | 0.000000  |
|                  |   |   |           |           |           |
| <b>3b (1_2):</b> |   |   |           |           |           |
| 1                | 6 | 0 | 0.985102  | 1.869749  | -0.236207 |
| 2                | 6 | 0 | 1.606267  | 0.750230  | -0.867193 |
| 3                | 6 | 0 | 2.213372  | -0.286855 | -0.064453 |
| 4                | 6 | 0 | 2.006231  | -0.285074 | 1.335125  |
| 5                | 6 | 0 | 1.298795  | 0.819990  | 1.931029  |
| 6                | 6 | 0 | 0.812675  | 1.851836  | 1.196353  |



|                  |   |   |           |           |           |
|------------------|---|---|-----------|-----------|-----------|
| 7                | 1 | 0 | 3.128893  | -1.327440 | -1.715023 |
| 8                | 6 | 0 | 2.965468  | -1.327327 | -0.640195 |
| 9                | 6 | 0 | 2.530570  | -1.331401 | 2.117736  |
| 10               | 1 | 0 | 1.164099  | 0.811785  | 3.010094  |
| 11               | 1 | 0 | 0.286079  | 2.686625  | 1.644709  |
| 12               | 6 | 0 | 3.253255  | -2.351591 | 1.532009  |
| 13               | 6 | 0 | 3.477147  | -2.342919 | 0.145647  |
| 14               | 1 | 0 | 2.363390  | -1.320267 | 3.191312  |
| 15               | 1 | 0 | 3.655075  | -3.154601 | 2.140437  |
| 16               | 1 | 0 | 4.052736  | -3.140627 | -0.312626 |
| 17               | 8 | 0 | 0.438338  | 2.786234  | -0.949984 |
| 18               | 6 | 0 | -0.234346 | 0.148737  | -1.625977 |
| 19               | 8 | 0 | -0.597679 | 1.171077  | -2.321358 |
| 20               | 1 | 0 | -0.179076 | 2.132965  | -1.770125 |
| 21               | 1 | 0 | 1.978900  | 0.901920  | -1.876111 |
| 22               | 1 | 0 | -0.709865 | -0.033793 | -0.650800 |
| 23               | 6 | 0 | 0.184811  | -1.079869 | -2.345100 |
| 24               | 6 | 0 | 0.235967  | -2.300521 | -1.668088 |
| 25               | 6 | 0 | 0.531481  | -1.007948 | -3.698457 |
| 26               | 6 | 0 | 0.637309  | -3.453147 | -2.331879 |
| 27               | 6 | 0 | 0.940669  | -2.148670 | -4.372372 |
| 28               | 1 | 0 | 0.462951  | -0.050493 | -4.203425 |
| 29               | 6 | 0 | 0.985517  | -3.349464 | -3.670914 |
| 30               | 1 | 0 | 0.691381  | -4.414328 | -1.836882 |
| 31               | 1 | 0 | 1.217146  | -2.132406 | -5.419054 |
| 32               | 1 | 0 | -0.024811 | -2.344390 | -0.614222 |
| 33               | 7 | 0 | 1.420947  | -4.564064 | -4.380119 |
| 34               | 8 | 0 | 1.721786  | -4.451643 | -5.553747 |
| 35               | 8 | 0 | 1.455771  | -5.602695 | -3.746352 |
|                  |   |   |           |           |           |
| <b>3b (2_3):</b> |   |   |           |           |           |
| 1                | 6 | 0 | -1.106860 | 2.226309  | 0.896314  |
| 2                | 6 | 0 | -1.221634 | 0.775702  | 1.081093  |
| 3                | 6 | 0 | -2.217478 | -0.015379 | 0.363056  |
| 4                | 6 | 0 | -3.186205 | 0.672127  | -0.411421 |
| 5                | 6 | 0 | -3.120161 | 2.115692  | -0.513483 |
| 6                | 6 | 0 | -2.165014 | 2.849340  | 0.089179  |
| 7                | 1 | 0 | -1.588873 | -1.999734 | 0.987562  |
| 8                | 6 | 0 | -2.305440 | -1.420536 | 0.412221  |
| 9                | 6 | 0 | -4.188407 | -0.041585 | -1.085729 |
| 10               | 1 | 0 | -3.880976 | 2.604530  | -1.118539 |
| 11               | 1 | 0 | -2.113589 | 3.928095  | -0.013671 |
| 12               | 6 | 0 | -4.254739 | -1.420953 | -1.020478 |
| 13               | 6 | 0 | -3.298849 | -2.107615 | -0.265353 |
| 14               | 1 | 0 | -4.916308 | 0.515404  | -1.670051 |
| 15               | 1 | 0 | -5.032282 | -1.962605 | -1.547460 |
| 16               | 1 | 0 | -3.331598 | -3.191060 | -0.205830 |

|                  |   |   |           |           |           |
|------------------|---|---|-----------|-----------|-----------|
| 17               | 8 | 0 | -0.216285 | 2.891097  | 1.430213  |
| 18               | 6 | 0 | -0.075903 | 0.138322  | 1.787810  |
| 19               | 1 | 0 | -1.423331 | 0.836293  | 2.633845  |
| 20               | 8 | 0 | -0.534611 | 0.462313  | 3.246660  |
| 21               | 1 | 0 | -0.736812 | -0.342663 | 3.753597  |
| 22               | 6 | 0 | 1.325510  | 0.643974  | 1.584681  |
| 23               | 6 | 0 | 2.157570  | 1.014821  | 2.639081  |
| 24               | 6 | 0 | 1.811450  | 0.640091  | 0.274882  |
| 25               | 6 | 0 | 3.472343  | 1.386142  | 2.391661  |
| 26               | 1 | 0 | 1.769384  | 1.043526  | 3.649979  |
| 27               | 6 | 0 | 3.123157  | 1.006279  | 0.013817  |
| 28               | 1 | 0 | 1.150346  | 0.365315  | -0.541625 |
| 29               | 6 | 0 | 3.931023  | 1.370230  | 1.082647  |
| 30               | 1 | 0 | 4.140671  | 1.689673  | 3.187366  |
| 31               | 1 | 0 | 3.526120  | 1.020034  | -0.990821 |
| 32               | 1 | 0 | -0.087874 | -0.950669 | 1.718603  |
| 33               | 7 | 0 | 5.324728  | 1.753923  | 0.817154  |
| 34               | 8 | 0 | 5.703625  | 1.733658  | -0.339601 |
| 35               | 8 | 0 | 6.015083  | 2.063708  | 1.770992  |
| <b>3b (3_4):</b> |   |   |           |           |           |
| 1                | 6 | 0 | -0.310648 | -0.731985 | -0.732131 |
| 2                | 6 | 0 | 1.105058  | -0.783217 | -0.638588 |
| 3                | 6 | 0 | 1.749407  | -1.612984 | -1.611840 |
| 4                | 6 | 0 | 3.168936  | -1.472039 | -1.807527 |
| 5                | 1 | 0 | 3.606575  | -2.024760 | -2.630894 |
| 6                | 8 | 0 | 1.136191  | -2.471152 | -2.348829 |
| 7                | 1 | 0 | -0.683851 | -1.160239 | -1.658315 |
| 8                | 6 | 0 | -1.627478 | -3.142883 | -0.858536 |
| 9                | 6 | 0 | -0.925046 | -2.600736 | 0.265253  |
| 10               | 1 | 0 | 0.134067  | -2.817249 | 0.318945  |
| 11               | 8 | 0 | -1.058449 | -3.346504 | -1.986631 |
| 12               | 1 | 0 | 0.066680  | -2.897901 | -2.108799 |
| 13               | 6 | 0 | 1.923693  | -0.131430 | 0.370411  |
| 14               | 6 | 0 | 3.328150  | -0.069376 | 0.180558  |
| 15               | 6 | 0 | 3.910916  | -0.718753 | -0.960644 |
| 16               | 1 | 0 | 4.985301  | -0.634750 | -1.103211 |
| 17               | 6 | 0 | 1.400720  | 0.403418  | 1.569696  |
| 18               | 1 | 0 | 0.339785  | 0.319628  | 1.776495  |
| 19               | 6 | 0 | 4.143888  | 0.575033  | 1.131499  |
| 20               | 1 | 0 | 5.214743  | 0.618482  | 0.952293  |
| 21               | 6 | 0 | -1.166073 | 0.404172  | -0.290302 |
| 22               | 6 | 0 | -0.650076 | 1.708719  | -0.235842 |
| 23               | 6 | 0 | -2.538475 | 0.213012  | -0.091875 |
| 24               | 6 | 0 | -1.472355 | 2.786741  | 0.056842  |
| 25               | 6 | 0 | -3.373215 | 1.279027  | 0.214224  |
| 26               | 1 | 0 | -2.957881 | -0.780325 | -0.188191 |

|                  |   |   |           |           |           |
|------------------|---|---|-----------|-----------|-----------|
| 27               | 6 | 0 | -2.819407 | 2.547792  | 0.292350  |
| 28               | 1 | 0 | -1.091677 | 3.799227  | 0.101228  |
| 29               | 1 | 0 | -4.433843 | 1.144243  | 0.383958  |
| 30               | 6 | 0 | -1.615776 | -2.421627 | 1.522847  |
| 31               | 6 | 0 | -3.045251 | -3.390979 | -0.737401 |
| 32               | 1 | 0 | -3.555060 | -3.779891 | -1.611721 |
| 33               | 6 | 0 | -3.009276 | -2.660217 | 1.601264  |
| 34               | 6 | 0 | -3.689398 | -3.164778 | 0.436538  |
| 35               | 1 | 0 | -4.755037 | -3.366084 | 0.516795  |
| 36               | 6 | 0 | 2.220967  | 1.013494  | 2.497887  |
| 37               | 1 | 0 | 1.788460  | 1.408818  | 3.411458  |
| 38               | 6 | 0 | 3.603405  | 1.119740  | 2.275888  |
| 39               | 1 | 0 | 4.238903  | 1.607327  | 3.007008  |
| 40               | 6 | 0 | -3.690579 | -2.436298 | 2.813067  |
| 41               | 6 | 0 | -3.009778 | -2.001677 | 3.931481  |
| 42               | 6 | 0 | -0.935942 | -2.007804 | 2.684830  |
| 43               | 6 | 0 | -1.621116 | -1.796924 | 3.865395  |
| 44               | 1 | 0 | 0.139010  | -1.854462 | 2.638646  |
| 45               | 1 | 0 | -1.081825 | -1.475174 | 4.750533  |
| 46               | 1 | 0 | -3.540277 | -1.828867 | 4.861508  |
| 47               | 1 | 0 | -4.761286 | -2.617102 | 2.854972  |
| 48               | 1 | 0 | 0.401335  | 1.879216  | -0.434987 |
| 49               | 7 | 0 | -3.694578 | 3.684905  | 0.617322  |
| 50               | 8 | 0 | -4.872961 | 3.449713  | 0.811324  |
| 51               | 8 | 0 | -3.184585 | 4.788618  | 0.672957  |
| <b>3b (4_5):</b> |   |   |           |           |           |
| 1                | 8 | 0 | 0.474372  | -3.537516 | -0.425002 |
| 2                | 6 | 0 | -0.398224 | -0.126104 | 0.413382  |
| 3                | 6 | 0 | -2.012912 | -1.634776 | -0.750437 |
| 4                | 6 | 0 | -3.308302 | -2.165993 | -0.982896 |
| 5                | 6 | 0 | -1.808673 | -0.578701 | 0.113241  |
| 6                | 6 | 0 | -4.390513 | -1.604940 | -0.368284 |
| 7                | 6 | 0 | -2.940920 | 0.057131  | 0.713098  |
| 8                | 6 | 0 | -4.242646 | -0.475088 | 0.480389  |
| 9                | 6 | 0 | 2.734364  | -1.076645 | -1.214664 |
| 10               | 6 | 0 | 2.930866  | -0.607121 | 0.160604  |
| 11               | 6 | 0 | 1.687708  | -1.835399 | -1.569704 |
| 12               | 6 | 0 | 4.114751  | 0.026264  | 0.545248  |
| 13               | 6 | 0 | 1.914577  | -0.810671 | 1.108191  |
| 14               | 6 | 0 | 0.738656  | -2.269117 | -0.529440 |
| 15               | 6 | 0 | 4.296185  | 0.447570  | 1.858064  |
| 16               | 1 | 0 | 4.894784  | 0.186644  | -0.193664 |
| 17               | 6 | 0 | 2.106004  | -0.394892 | 2.421495  |
| 18               | 6 | 0 | 0.571110  | -1.349181 | 0.659804  |
| 19               | 6 | 0 | 3.293653  | 0.229480  | 2.799955  |
| 20               | 1 | 0 | 5.219276  | 0.938057  | 2.147742  |
| 21               | 1 | 0 | 1.318695  | -0.559208 | 3.153313  |

|                  |   |   |           |           |           |
|------------------|---|---|-----------|-----------|-----------|
| 22               | 1 | 0 | 3.435069  | 0.542692  | 3.829044  |
| 23               | 1 | 0 | 3.506113  | -0.835617 | -1.941429 |
| 24               | 1 | 0 | 1.577315  | -2.267344 | -2.557754 |
| 25               | 6 | 0 | -2.835262 | 1.220657  | 1.524333  |
| 26               | 6 | 0 | -3.946559 | 1.796142  | 2.087919  |
| 27               | 1 | 0 | -1.867617 | 1.686505  | 1.677847  |
| 28               | 6 | 0 | -5.230803 | 1.245620  | 1.878271  |
| 29               | 1 | 0 | -3.838715 | 2.689277  | 2.694997  |
| 30               | 6 | 0 | -5.369448 | 0.135940  | 1.085750  |
| 31               | 1 | 0 | -6.099585 | 1.708279  | 2.334105  |
| 32               | 1 | 0 | -6.350631 | -0.292819 | 0.900642  |
| 33               | 1 | 0 | -3.404636 | -3.009422 | -1.658105 |
| 34               | 1 | 0 | -5.386204 | -2.005669 | -0.535988 |
| 35               | 8 | 0 | -0.962517 | -2.173582 | -1.420151 |
| 36               | 1 | 0 | 0.115780  | -1.948768 | 1.454044  |
| 37               | 1 | 0 | -0.404869 | 0.357944  | 1.394114  |
| 38               | 1 | 0 | -0.531912 | -3.263238 | -1.012561 |
| 39               | 6 | 0 | 0.134181  | 0.901179  | -0.575617 |
| 40               | 6 | 0 | 0.984292  | 1.916054  | -0.121207 |
| 41               | 6 | 0 | -0.200852 | 0.855228  | -1.933548 |
| 42               | 6 | 0 | 1.511886  | 2.856474  | -0.996480 |
| 43               | 6 | 0 | 0.314766  | 1.787445  | -2.824092 |
| 44               | 1 | 0 | -0.859720 | 0.075253  | -2.299039 |
| 45               | 6 | 0 | 1.166601  | 2.769434  | -2.337118 |
| 46               | 1 | 0 | 2.174030  | 3.645144  | -0.662509 |
| 47               | 1 | 0 | 0.071153  | 1.766795  | -3.878817 |
| 48               | 1 | 0 | 1.250404  | 1.960343  | 0.931721  |
| 49               | 7 | 0 | 1.721584  | 3.756421  | -3.275259 |
| 50               | 8 | 0 | 2.467903  | 4.606120  | -2.823293 |
| 51               | 8 | 0 | 1.404482  | 3.661451  | -4.446760 |
| <b>3b (5_6):</b> |   |   |           |           |           |
| 1                | 8 | 0 | -0.607101 | 7.729447  | -5.026196 |
| 2                | 6 | 0 | 1.795654  | 7.787349  | -6.568062 |
| 3                | 6 | 0 | 2.892402  | 8.240414  | -5.607352 |
| 4                | 6 | 0 | 2.592710  | 8.459072  | -4.257502 |
| 5                | 6 | 0 | 4.202475  | 8.427677  | -6.049753 |
| 6                | 6 | 0 | 3.575724  | 8.863950  | -3.367906 |
| 7                | 6 | 0 | 5.204542  | 8.832750  | -5.174853 |
| 8                | 1 | 0 | 4.449636  | 8.246784  | -7.092603 |
| 9                | 6 | 0 | 4.867858  | 9.045572  | -3.847616 |
| 10               | 1 | 0 | 3.366385  | 9.039866  | -2.320345 |
| 11               | 1 | 0 | 6.227092  | 8.981294  | -5.498132 |
| 12               | 6 | 0 | -0.043971 | 6.520964  | -5.324757 |
| 13               | 6 | 0 | -0.268245 | 5.541487  | -4.273878 |
| 14               | 6 | 0 | 1.172196  | 6.453955  | -6.153848 |
| 15               | 6 | 0 | 0.564322  | 4.492130  | -4.150420 |
| 16               | 6 | 0 | 2.059927  | 5.307866  | -5.937076 |

|     |   |   |           |           |           |
|-----|---|---|-----------|-----------|-----------|
| 17  | 6 | 0 | 1.729230  | 4.312082  | -4.988658 |
| 18  | 6 | 0 | -1.301386 | 10.830367 | -6.741921 |
| 19  | 6 | 0 | -0.156330 | 10.987470 | -7.568024 |
| 20  | 6 | 0 | -1.424966 | 9.744457  | -5.923406 |
| 21  | 6 | 0 | -0.017725 | 12.116952 | -8.413971 |
| 22  | 6 | 0 | 0.872063  | 10.000867 | -7.537348 |
| 23  | 6 | 0 | -0.399881 | 8.772062  | -5.909564 |
| 24  | 6 | 0 | 1.096220  | 12.279075 | -9.195512 |
| 25  | 1 | 0 | -0.814943 | 12.854924 | -8.425883 |
| 26  | 6 | 0 | 2.016566  | 10.204389 | -8.353721 |
| 27  | 6 | 0 | 0.727171  | 8.858492  | -6.687627 |
| 28  | 6 | 0 | 2.124589  | 11.310742 | -9.158390 |
| 29  | 1 | 0 | 1.194664  | 13.147868 | -9.837458 |
| 30  | 1 | 0 | 2.825066  | 9.483221  | -8.334578 |
| 31  | 1 | 0 | 3.010160  | 11.445677 | -9.770730 |
| 32  | 1 | 0 | -2.076776 | 11.590041 | -6.769412 |
| 33  | 1 | 0 | -2.282939 | 9.597884  | -5.276799 |
| 34  | 1 | 0 | 2.255474  | 7.654496  | -7.552822 |
| 35  | 6 | 0 | 3.245433  | 5.141654  | -6.676116 |
| 36  | 6 | 0 | 4.050909  | 4.030011  | -6.500211 |
| 37  | 1 | 0 | 3.530619  | 5.889731  | -7.408969 |
| 38  | 6 | 0 | 3.708875  | 3.039523  | -5.571719 |
| 39  | 1 | 0 | 4.956398  | 3.927924  | -7.090141 |
| 40  | 6 | 0 | 2.557284  | 3.189721  | -4.823715 |
| 41  | 1 | 0 | 4.342895  | 2.169968  | -5.438444 |
| 42  | 1 | 0 | 2.277788  | 2.439559  | -4.088492 |
| 43  | 1 | 0 | -1.120514 | 5.700239  | -3.623420 |
| 44  | 1 | 0 | 0.382802  | 3.752161  | -3.375022 |
| 45  | 8 | 0 | -1.052210 | 5.941657  | -6.679986 |
| 46  | 1 | 0 | -1.700862 | 6.593123  | -6.995406 |
| 47  | 1 | 0 | 0.140413  | 6.099528  | -7.021870 |
| 48  | 1 | 0 | 1.577842  | 8.303904  | -3.901390 |
| 49  | 7 | 0 | 5.917014  | 9.475254  | -2.912671 |
| 50  | 8 | 0 | 7.041107  | 9.625436  | -3.356427 |
| 51  | 8 | 0 | 5.597878  | 9.655819  | -1.751643 |
|     |   |   |           |           |           |
| 3j: |   |   |           |           |           |
| 1   | 6 | 0 | 0.756719  | 0.052407  | 0.599998  |
| 2   | 6 | 0 | 2.132217  | 0.205941  | 0.600283  |
| 3   | 6 | 0 | 2.751696  | 1.188140  | -0.173774 |
| 4   | 6 | 0 | 1.953475  | 2.026352  | -0.960260 |
| 5   | 6 | 0 | 0.580121  | 1.890700  | -0.975493 |
| 6   | 6 | 0 | -0.055684 | 0.895565  | -0.192082 |
| 7   | 1 | 0 | 0.310265  | -0.720091 | 1.212717  |
| 8   | 1 | 0 | 2.442768  | 2.788024  | -1.559789 |
| 9   | 1 | 0 | -0.009299 | 2.555015  | -1.594611 |
| 10  | 6 | 0 | 4.213597  | 1.340192  | -0.163851 |

|                |   |   |           |           |           |
|----------------|---|---|-----------|-----------|-----------|
| 11             | 8 | 0 | 4.825634  | 2.165857  | -0.805997 |
| 12             | 1 | 0 | 4.750445  | 0.623054  | 0.495404  |
| 13             | 1 | 0 | 2.742049  | -0.451815 | 1.216004  |
| 14             | 7 | 0 | -1.419876 | 0.755783  | -0.202846 |
| 15             | 6 | 0 | -2.046539 | -0.266896 | 0.607241  |
| 16             | 1 | 0 | -3.125931 | -0.221585 | 0.467676  |
| 17             | 1 | 0 | -1.707695 | -1.271041 | 0.323383  |
| 18             | 1 | 0 | -1.834092 | -0.123691 | 1.674045  |
| 19             | 6 | 0 | -2.231217 | 1.631588  | -1.022015 |
| 20             | 1 | 0 | -3.280197 | 1.365808  | -0.896911 |
| 21             | 1 | 0 | -2.109121 | 2.682938  | -0.733736 |
| 22             | 1 | 0 | -1.980216 | 1.537406  | -2.085686 |
|                |   |   |           |           |           |
| <b>3j (2):</b> |   |   |           |           |           |
| 1              | 6 | 0 | 0.043952  | 1.426524  | -1.534677 |
| 2              | 6 | 0 | 0.024900  | 0.076788  | -0.842124 |
| 3              | 6 | 0 | 1.229152  | -0.237942 | 0.001924  |
| 4              | 6 | 0 | 2.142043  | 0.771340  | 0.347746  |
| 5              | 6 | 0 | 1.984593  | 2.110235  | -0.214475 |
| 6              | 6 | 0 | 1.027800  | 2.425408  | -1.102905 |
| 7              | 1 | 0 | 0.716241  | -2.308809 | 0.233728  |
| 8              | 6 | 0 | 1.415464  | -1.522819 | 0.508448  |
| 9              | 6 | 0 | 3.206103  | 0.481428  | 1.208650  |
| 10             | 1 | 0 | 2.700976  | 2.865111  | 0.102053  |
| 11             | 1 | 0 | 0.932607  | 3.415856  | -1.533712 |
| 12             | 6 | 0 | 3.373560  | -0.798518 | 1.719754  |
| 13             | 6 | 0 | 2.478764  | -1.805679 | 1.361267  |
| 14             | 1 | 0 | 3.902917  | 1.272346  | 1.472345  |
| 15             | 1 | 0 | 4.200259  | -1.014560 | 2.388023  |
| 16             | 1 | 0 | 2.608914  | -2.811767 | 1.746340  |
| 17             | 8 | 0 | -0.813009 | 1.691530  | -2.369596 |
| 18             | 6 | 0 | -1.298458 | 0.050309  | 0.020997  |
| 19             | 8 | 0 | -2.414574 | 0.026970  | -0.824263 |
| 20             | 1 | 0 | -2.228533 | 0.612555  | -1.576758 |
| 21             | 1 | 0 | -0.119502 | -0.693801 | -1.607882 |
| 22             | 6 | 0 | -1.320241 | 1.196139  | 1.016343  |
| 23             | 6 | 0 | -2.015958 | 2.371838  | 0.741329  |
| 24             | 6 | 0 | -0.602678 | 1.130444  | 2.210796  |
| 25             | 6 | 0 | -1.980573 | 3.455194  | 1.608685  |
| 26             | 1 | 0 | -2.610537 | 2.436796  | -0.164522 |
| 27             | 6 | 0 | -0.554009 | 2.204629  | 3.088967  |
| 28             | 6 | 0 | -1.230461 | 3.405380  | 2.799123  |
| 29             | 1 | 0 | -2.549668 | 4.340689  | 1.355212  |
| 30             | 1 | 0 | 0.008087  | 2.098226  | 4.008249  |
| 31             | 1 | 0 | -1.288659 | -0.899692 | 0.568986  |
| 32             | 1 | 0 | -0.067018 | 0.219053  | 2.468441  |
| 33             | 7 | 0 | -1.160596 | 4.497417  | 3.655837  |

|                |   |   |           |           |           |
|----------------|---|---|-----------|-----------|-----------|
| 34             | 6 | 0 | -0.642984 | 4.289022  | 4.991747  |
| 35             | 1 | 0 | 0.405667  | 3.977524  | 4.956880  |
| 36             | 1 | 0 | -0.686670 | 5.230326  | 5.540345  |
| 37             | 1 | 0 | -1.206410 | 3.529411  | 5.554660  |
| 38             | 6 | 0 | -2.098543 | 5.583319  | 3.461244  |
| 39             | 1 | 0 | -3.148052 | 5.258030  | 3.523479  |
| 40             | 1 | 0 | -1.924945 | 6.343061  | 4.223882  |
| 41             | 1 | 0 | -1.946002 | 6.055372  | 2.485922  |
|                |   |   |           |           |           |
| <b>3j (3):</b> |   |   |           |           |           |
| 1              | 6 | 0 | -2.382700 | 2.152131  | -1.481010 |
| 2              | 6 | 0 | -1.020230 | 2.678540  | -1.195044 |
| 3              | 6 | 0 | -0.896854 | 3.753133  | -0.186071 |
| 4              | 6 | 0 | -1.962537 | 4.007115  | 0.704929  |
| 5              | 6 | 0 | -3.202841 | 3.261296  | 0.562926  |
| 6              | 6 | 0 | -3.406141 | 2.402457  | -0.448050 |
| 7              | 1 | 0 | 1.048633  | 4.443638  | -0.807704 |
| 8              | 6 | 0 | 0.247665  | 4.557369  | -0.084755 |
| 9              | 6 | 0 | -1.836579 | 4.989852  | 1.693635  |
| 10             | 1 | 0 | -3.989222 | 3.452495  | 1.289813  |
| 11             | 1 | 0 | -4.347243 | 1.882278  | -0.590424 |
| 12             | 6 | 0 | -0.679619 | 5.745191  | 1.803463  |
| 13             | 6 | 0 | 0.360520  | 5.530986  | 0.898527  |
| 14             | 1 | 0 | -2.668269 | 5.158074  | 2.372628  |
| 15             | 1 | 0 | -0.592632 | 6.507237  | 2.570486  |
| 16             | 1 | 0 | 1.258761  | 6.137954  | 0.949402  |
| 17             | 8 | 0 | -2.676891 | 1.496125  | -2.471910 |
| 18             | 6 | 0 | 0.121761  | 2.082871  | -1.653402 |
| 19             | 1 | 0 | 1.020152  | 2.419772  | -1.136017 |
| 20             | 6 | 0 | 0.436691  | 1.034517  | -2.607745 |
| 21             | 6 | 0 | 1.670909  | 0.377984  | -2.421448 |
| 22             | 6 | 0 | -0.313345 | 0.657344  | -3.738702 |
| 23             | 6 | 0 | 2.111172  | -0.630968 | -3.252048 |
| 24             | 6 | 0 | 0.123471  | -0.337913 | -4.592885 |
| 25             | 1 | 0 | -1.243910 | 1.162997  | -3.945717 |
| 26             | 6 | 0 | 1.334456  | -1.027895 | -4.365036 |
| 27             | 1 | 0 | 3.062572  | -1.105066 | -3.046763 |
| 28             | 1 | 0 | -0.485224 | -0.578069 | -5.455443 |
| 29             | 1 | 0 | 2.297078  | 0.667827  | -1.581096 |
| 30             | 7 | 0 | 1.750579  | -2.033469 | -5.199033 |
| 31             | 6 | 0 | 0.969294  | -2.366126 | -6.371912 |
| 32             | 1 | 0 | 1.444523  | -3.196511 | -6.893055 |
| 33             | 1 | 0 | -0.045832 | -2.674189 | -6.097046 |
| 34             | 1 | 0 | 0.893108  | -1.520440 | -7.067752 |
| 35             | 6 | 0 | 3.035889  | -2.663149 | -4.983913 |
| 36             | 1 | 0 | 3.086620  | -3.135772 | -3.996067 |
| 37             | 1 | 0 | 3.183880  | -3.438034 | -5.735277 |

|                |   |   |           |           |            |
|----------------|---|---|-----------|-----------|------------|
| 38             | 1 | 0 | 3.863175  | -1.945567 | -5.062498  |
|                |   |   |           |           |            |
| <b>3j (4):</b> |   |   |           |           |            |
| 1              | 8 | 0 | -0.466950 | 8.321892  | -4.412955  |
| 2              | 6 | 0 | 1.927457  | 7.732782  | -5.834328  |
| 3              | 6 | 0 | 2.620268  | 8.505510  | -4.717490  |
| 4              | 6 | 0 | 2.329504  | 9.831214  | -4.402307  |
| 5              | 6 | 0 | 3.677573  | 7.907343  | -4.024289  |
| 6              | 6 | 0 | 3.043476  | 10.530804 | -3.434308  |
| 7              | 1 | 0 | 1.534636  | 10.361497 | -4.919936  |
| 8              | 6 | 0 | 4.400275  | 8.585044  | -3.057762  |
| 9              | 6 | 0 | 4.090782  | 9.919808  | -2.725308  |
| 10             | 1 | 0 | 2.772747  | 11.560501 | -3.238304  |
| 11             | 1 | 0 | 5.206480  | 8.066387  | -2.554414  |
| 12             | 6 | 0 | 1.282494  | 5.771732  | -4.287488  |
| 13             | 6 | 0 | 1.116583  | 4.374442  | -4.069880  |
| 14             | 6 | 0 | 1.590043  | 6.268686  | -5.545237  |
| 15             | 6 | 0 | 1.197757  | 3.490109  | -5.100267  |
| 16             | 6 | 0 | 1.637605  | 5.342817  | -6.647506  |
| 17             | 6 | 0 | 1.440951  | 3.948524  | -6.423028  |
| 18             | 6 | 0 | -1.211469 | 10.489408 | -7.090182  |
| 19             | 6 | 0 | 0.087726  | 10.560444 | -7.753314  |
| 20             | 6 | 0 | -1.455419 | 9.674323  | -6.051223  |
| 21             | 6 | 0 | 0.339426  | 11.572266 | -8.684768  |
| 22             | 6 | 0 | 1.101211  | 9.641889  | -7.409666  |
| 23             | 6 | 0 | -0.389959 | 8.801244  | -5.530418  |
| 24             | 6 | 0 | 1.591489  | 11.700668 | -9.269936  |
| 25             | 1 | 0 | -0.458285 | 12.265736 | -8.936804  |
| 26             | 6 | 0 | 2.357417  | 9.793469  | -7.994898  |
| 27             | 6 | 0 | 0.748243  | 8.482072  | -6.489365  |
| 28             | 6 | 0 | 2.602184  | 10.813965 | -8.912124  |
| 29             | 1 | 0 | 1.781481  | 12.490061 | -9.989049  |
| 30             | 1 | 0 | 3.172661  | 9.130567  | -7.728172  |
| 31             | 1 | 0 | 3.592070  | 10.913969 | -9.345075  |
| 32             | 1 | 0 | -1.979397 | 11.179923 | -7.432156  |
| 33             | 1 | 0 | -2.388577 | 9.690862  | -5.499144  |
| 34             | 1 | 0 | 2.690828  | 7.655102  | -6.613155  |
| 35             | 6 | 0 | 1.873916  | 5.749274  | -7.993709  |
| 36             | 6 | 0 | 1.913810  | 4.842159  | -9.025435  |
| 37             | 1 | 0 | 2.017388  | 6.797494  | -8.235818  |
| 38             | 6 | 0 | 1.724438  | 3.465380  | -8.786814  |
| 39             | 1 | 0 | 2.091605  | 5.193541  | -10.037047 |
| 40             | 6 | 0 | 1.493268  | 3.036698  | -7.504732  |
| 41             | 1 | 0 | 1.759686  | 2.758735  | -9.609053  |
| 42             | 1 | 0 | 1.342509  | 1.981253  | -7.293276  |
| 43             | 1 | 0 | 0.906551  | 4.060034  | -3.053452  |
| 44             | 1 | 0 | 1.062972  | 2.425688  | -4.929512  |



|         |   |   |           |           |           |
|---------|---|---|-----------|-----------|-----------|
| 45      | 8 | 0 | 1.146124  | 6.520817  | -3.176370 |
| 46      | 1 | 0 | 0.858338  | 7.412501  | -3.435477 |
| 47      | 1 | 0 | 0.255988  | 7.749692  | -7.156983 |
| 48      | 1 | 0 | 3.933445  | 6.873701  | -4.243629 |
| 49      | 7 | 0 | 4.787110  | 10.595937 | -1.733415 |
| 50      | 6 | 0 | 4.608360  | 12.027503 | -1.621628 |
| 51      | 1 | 0 | 3.570196  | 12.269044 | -1.372588 |
| 52      | 1 | 0 | 5.235739  | 12.402355 | -0.812520 |
| 53      | 1 | 0 | 4.871535  | 12.563939 | -2.546053 |
| 54      | 6 | 0 | 6.024906  | 10.024502 | -1.246384 |
| 55      | 1 | 0 | 5.842794  | 9.060648  | -0.761020 |
| 56      | 1 | 0 | 6.766890  | 9.870972  | -2.044446 |
| 57      | 1 | 0 | 6.453955  | 10.692158 | -0.498792 |
|         |   |   |           |           |           |
| 3j (5): |   |   |           |           |           |
| 1       | 8 | 0 | -0.470358 | 7.332078  | -5.104838 |
| 2       | 6 | 0 | 1.763383  | 8.077754  | -6.645477 |
| 3       | 6 | 0 | 2.754280  | 8.472431  | -5.560929 |
| 4       | 6 | 0 | 4.116653  | 8.216201  | -5.724760 |
| 5       | 6 | 0 | 2.352303  | 9.051441  | -4.357033 |
| 6       | 6 | 0 | 5.041617  | 8.506830  | -4.731091 |
| 7       | 6 | 0 | 3.261954  | 9.353525  | -3.353337 |
| 8       | 1 | 0 | 1.300359  | 9.266627  | -4.190563 |
| 9       | 6 | 0 | 4.635658  | 9.093740  | -3.517973 |
| 10      | 1 | 0 | 6.084436  | 8.276611  | -4.909846 |
| 11      | 1 | 0 | 2.893325  | 9.797039  | -2.436870 |
| 12      | 6 | 0 | 0.421150  | 6.262089  | -5.432882 |
| 13      | 6 | 0 | 1.178682  | 5.942693  | -4.165779 |
| 14      | 6 | 0 | 1.333985  | 6.581867  | -6.614474 |
| 15      | 6 | 0 | 2.388883  | 5.384304  | -4.212304 |
| 16      | 6 | 0 | 2.525731  | 5.655608  | -6.669816 |
| 17      | 6 | 0 | 3.063349  | 5.120666  | -5.487779 |
| 18      | 6 | 0 | -1.955148 | 10.282703 | -6.568793 |
| 19      | 6 | 0 | -0.875699 | 10.828445 | -7.314744 |
| 20      | 6 | 0 | -1.806448 | 9.117020  | -5.871872 |
| 21      | 6 | 0 | -1.008610 | 12.050846 | -8.020928 |
| 22      | 6 | 0 | 0.370320  | 10.138227 | -7.338836 |
| 23      | 6 | 0 | -0.566074 | 8.434582  | -5.907447 |
| 24      | 6 | 0 | 0.049572  | 12.586185 | -8.708696 |
| 25      | 1 | 0 | -1.968982 | 12.559123 | -7.999795 |
| 26      | 6 | 0 | 1.453672  | 10.728683 | -8.044447 |
| 27      | 6 | 0 | 0.500886  | 8.902605  | -6.638004 |
| 28      | 6 | 0 | 1.296145  | 11.918701 | -8.709148 |
| 29      | 1 | 0 | -0.061458 | 13.523740 | -9.243306 |
| 30      | 1 | 0 | 2.425317  | 10.245906 | -8.030966 |
| 31      | 1 | 0 | 2.138084  | 12.356621 | -9.235796 |
| 32      | 1 | 0 | -2.903033 | 10.813158 | -6.555446 |

|                |   |   |           |           |           |
|----------------|---|---|-----------|-----------|-----------|
| 33             | 1 | 0 | -2.610781 | 8.688006  | -5.284821 |
| 34             | 1 | 0 | 2.262832  | 8.203158  | -7.613106 |
| 35             | 6 | 0 | 3.162190  | 5.407888  | -7.882297 |
| 36             | 6 | 0 | 4.326847  | 4.644778  | -7.934964 |
| 37             | 1 | 0 | 2.740830  | 5.820963  | -8.795928 |
| 38             | 6 | 0 | 4.866743  | 4.123800  | -6.761861 |
| 39             | 1 | 0 | 4.809212  | 4.457368  | -8.888785 |
| 40             | 6 | 0 | 4.234116  | 4.361398  | -5.546672 |
| 41             | 1 | 0 | 5.775057  | 3.531080  | -6.794982 |
| 42             | 1 | 0 | 4.647707  | 3.956211  | -4.627038 |
| 43             | 1 | 0 | 0.672590  | 6.163085  | -3.230206 |
| 44             | 1 | 0 | 2.912068  | 5.115616  | -3.298311 |
| 45             | 8 | 0 | -0.351752 | 5.166675  | -5.842222 |
| 46             | 1 | 0 | -0.851991 | 4.856276  | -5.076738 |
| 47             | 1 | 0 | 0.719062  | 6.418249  | -7.507359 |
| 48             | 1 | 0 | 4.467004  | 7.756242  | -6.646418 |
| 49             | 7 | 0 | 5.556184  | 9.418144  | -2.528802 |
| 50             | 6 | 0 | 5.058837  | 9.745043  | -1.209149 |
| 51             | 1 | 0 | 4.450841  | 8.939262  | -0.770238 |
| 52             | 1 | 0 | 5.904420  | 9.940447  | -0.549048 |
| 53             | 1 | 0 | 4.448408  | 10.652828 | -1.239041 |
| 54             | 6 | 0 | 6.892441  | 8.870786  | -2.629426 |
| 55             | 1 | 0 | 7.473990  | 9.191244  | -1.764560 |
| 56             | 1 | 0 | 6.901497  | 7.770793  | -2.669589 |
| 57             | 1 | 0 | 7.398858  | 9.246810  | -3.523815 |
|                |   |   |           |           |           |
| <b>3j (6):</b> |   |   |           |           |           |
| 1              | 8 | 0 | -0.565152 | 7.244277  | -5.006772 |
| 2              | 6 | 0 | 1.875081  | 7.934037  | -6.386568 |
| 3              | 6 | 0 | 2.905255  | 8.604489  | -5.479845 |
| 4              | 6 | 0 | 4.148706  | 9.017191  | -5.940365 |
| 5              | 6 | 0 | 2.605889  | 8.825660  | -4.131272 |
| 6              | 6 | 0 | 5.079509  | 9.619443  | -5.094586 |
| 7              | 6 | 0 | 3.513989  | 9.432151  | -3.282917 |
| 8              | 1 | 0 | 1.633566  | 8.526226  | -3.745560 |
| 9              | 6 | 0 | 4.780056  | 9.840164  | -3.744861 |
| 10             | 1 | 0 | 6.043153  | 9.903307  | -5.499140 |
| 11             | 1 | 0 | 3.230044  | 9.621666  | -2.253782 |
| 12             | 6 | 0 | 0.391585  | 6.287023  | -5.217040 |
| 13             | 6 | 0 | 0.073434  | 5.017383  | -4.675418 |
| 14             | 6 | 0 | 1.557208  | 6.532373  | -5.898885 |
| 15             | 6 | 0 | 0.942767  | 3.980321  | -4.838812 |
| 16             | 6 | 0 | 2.475746  | 5.447884  | -6.076469 |
| 17             | 6 | 0 | 2.161845  | 4.162870  | -5.548097 |
| 18             | 6 | 0 | -1.764301 | 10.309890 | -6.462970 |
| 19             | 6 | 0 | -0.652124 | 10.744348 | -7.235484 |
| 20             | 6 | 0 | -1.697526 | 9.157631  | -5.737903 |

|                  |   |   |           |           |           |
|------------------|---|---|-----------|-----------|-----------|
| 21               | 6 | 0 | -0.715532 | 11.935015 | -8.000558 |
| 22               | 6 | 0 | 0.543317  | 9.969966  | -7.234231 |
| 23               | 6 | 0 | -0.507378 | 8.389667  | -5.756011 |
| 24               | 6 | 0 | 0.359756  | 12.357167 | -8.739605 |
| 25               | 1 | 0 | -1.638482 | 12.508464 | -7.988631 |
| 26               | 6 | 0 | 1.640952  | 10.440183 | -8.002706 |
| 27               | 6 | 0 | 0.605070  | 8.760804  | -6.469084 |
| 28               | 6 | 0 | 1.550075  | 11.597769 | -8.735693 |
| 29               | 1 | 0 | 0.301495  | 13.270557 | -9.322114 |
| 30               | 1 | 0 | 2.570959  | 9.884885  | -8.002710 |
| 31               | 1 | 0 | 2.403767  | 11.935369 | -9.314583 |
| 32               | 1 | 0 | -2.670145 | 10.908993 | -6.463803 |
| 33               | 1 | 0 | -2.530327 | 8.793659  | -5.146690 |
| 34               | 1 | 0 | 2.305019  | 7.860747  | -7.393331 |
| 35               | 6 | 0 | 3.707993  | 5.600634  | -6.765551 |
| 36               | 6 | 0 | 4.565456  | 4.540831  | -6.929803 |
| 37               | 1 | 0 | 3.983942  | 6.571252  | -7.159220 |
| 38               | 6 | 0 | 4.245622  | 3.267389  | -6.410487 |
| 39               | 1 | 0 | 5.501035  | 4.684087  | -7.460896 |
| 40               | 6 | 0 | 3.067072  | 3.088749  | -5.732475 |
| 41               | 1 | 0 | 4.932306  | 2.438565  | -6.546510 |
| 42               | 1 | 0 | 2.805673  | 2.116561  | -5.323368 |
| 43               | 1 | 0 | -0.868249 | 4.909072  | -4.149032 |
| 44               | 1 | 0 | 0.713028  | 2.999255  | -4.433552 |
| 45               | 1 | 0 | 4.417312  | 8.861444  | -6.984027 |
| 46               | 7 | 0 | 5.673517  | 10.485910 | -2.871178 |
| 47               | 6 | 0 | 6.906939  | 10.979561 | -3.446179 |
| 48               | 1 | 0 | 7.428877  | 11.575023 | -2.693541 |
| 49               | 1 | 0 | 7.585302  | 10.174545 | -3.777138 |
| 50               | 1 | 0 | 6.690613  | 11.625901 | -4.299729 |
| 51               | 6 | 0 | 5.887107  | 9.864275  | -1.572348 |
| 52               | 1 | 0 | 6.380887  | 10.581063 | -0.911093 |
| 53               | 1 | 0 | 4.941424  | 9.583629  | -1.111785 |
| 54               | 1 | 0 | 6.516983  | 8.962935  | -1.642503 |
|                  |   |   |           |           |           |
| <b>3j (1_2):</b> |   |   |           |           |           |
| 1                | 6 | 0 | 0.907975  | 2.054017  | 0.164870  |
| 2                | 6 | 0 | 1.539575  | 1.111323  | -0.698752 |
| 3                | 6 | 0 | 2.282249  | 0.003507  | -0.157410 |
| 4                | 6 | 0 | 2.242902  | -0.243360 | 1.236454  |
| 5                | 6 | 0 | 1.545631  | 0.690234  | 2.084110  |
| 6                | 6 | 0 | 0.910695  | 1.780656  | 1.588019  |
| 7                | 1 | 0 | 3.012542  | -0.708220 | -2.056141 |
| 8                | 6 | 0 | 2.995304  | -0.887111 | -0.983976 |
| 9                | 6 | 0 | 2.905981  | -1.367456 | 1.764048  |
| 10               | 1 | 0 | 1.539598  | 0.496370  | 3.154420  |
| 11               | 1 | 0 | 0.386767  | 2.484278  | 2.225690  |

|                  |   |   |           |           |           |
|------------------|---|---|-----------|-----------|-----------|
| 12               | 6 | 0 | 3.595325  | -2.230836 | 0.936101  |
| 13               | 6 | 0 | 3.640164  | -1.983933 | -0.446117 |
| 14               | 1 | 0 | 2.868932  | -1.543733 | 2.835901  |
| 15               | 1 | 0 | 4.103855  | -3.095069 | 1.350264  |
| 16               | 1 | 0 | 4.180081  | -2.663603 | -1.098047 |
| 17               | 8 | 0 | 0.217309  | 3.018051  | -0.311819 |
| 18               | 6 | 0 | -0.373338 | 0.437920  | -1.373694 |
| 19               | 8 | 0 | -0.851228 | 1.544160  | -1.858337 |
| 20               | 1 | 0 | -0.503005 | 2.377380  | -1.217191 |
| 21               | 1 | 0 | 1.752784  | 1.431379  | -1.713974 |
| 22               | 1 | 0 | -0.695013 | 0.116565  | -0.374353 |
| 23               | 6 | 0 | -0.004698 | -0.633774 | -2.296627 |
| 24               | 6 | 0 | 0.208068  | -1.934665 | -1.830842 |
| 25               | 6 | 0 | 0.169043  | -0.376571 | -3.661927 |
| 26               | 6 | 0 | 0.568169  | -2.956340 | -2.692753 |
| 27               | 6 | 0 | 0.536725  | -1.382417 | -4.534669 |
| 28               | 1 | 0 | 0.001168  | 0.632200  | -4.025781 |
| 29               | 6 | 0 | 0.740808  | -2.705137 | -4.071530 |
| 30               | 1 | 0 | 0.726227  | -3.948983 | -2.291328 |
| 31               | 1 | 0 | 0.659728  | -1.147328 | -5.584297 |
| 32               | 1 | 0 | 0.102675  | -2.146503 | -0.769191 |
| 33               | 7 | 0 | 1.094769  | -3.710515 | -4.937263 |
| 34               | 6 | 0 | 1.326420  | -3.412018 | -6.334564 |
| 35               | 1 | 0 | 1.596764  | -4.330113 | -6.855005 |
| 36               | 1 | 0 | 0.426359  | -3.005950 | -6.811019 |
| 37               | 1 | 0 | 2.140761  | -2.688261 | -6.470016 |
| 38               | 6 | 0 | 1.362873  | -5.037246 | -4.425721 |
| 39               | 1 | 0 | 1.629018  | -5.692631 | -5.254222 |
| 40               | 1 | 0 | 2.192217  | -5.038662 | -3.705959 |
| 41               | 1 | 0 | 0.480969  | -5.459641 | -3.929599 |
|                  |   |   |           |           |           |
| <b>3j (2_3):</b> |   |   |           |           |           |
| 1                | 6 | 0 | -1.413824 | 2.106024  | 1.629494  |
| 2                | 6 | 0 | -1.310453 | 0.687306  | 1.290791  |
| 3                | 6 | 0 | -2.210531 | 0.076268  | 0.316444  |
| 4                | 6 | 0 | -3.321015 | 0.830135  | -0.146926 |
| 5                | 6 | 0 | -3.477582 | 2.200758  | 0.288153  |
| 6                | 6 | 0 | -2.597981 | 2.804376  | 1.109064  |
| 7                | 1 | 0 | -1.226374 | -1.851284 | 0.093313  |
| 8                | 6 | 0 | -2.071921 | -1.233281 | -0.190542 |
| 9                | 6 | 0 | -4.243624 | 0.264239  | -1.039954 |
| 10               | 1 | 0 | -4.338783 | 2.748120  | -0.089861 |
| 11               | 1 | 0 | -2.704247 | 3.841621  | 1.409555  |
| 12               | 6 | 0 | -4.093970 | -1.028562 | -1.504692 |
| 13               | 6 | 0 | -2.989942 | -1.772038 | -1.075822 |
| 14               | 1 | 0 | -5.083054 | 0.871938  | -1.368534 |
| 15               | 1 | 0 | -4.811642 | -1.455477 | -2.196563 |

|                  |   |   |           |           |           |
|------------------|---|---|-----------|-----------|-----------|
| 16               | 1 | 0 | -2.843016 | -2.783608 | -1.441983 |
| 17               | 8 | 0 | -0.617479 | 2.682476  | 2.378792  |
| 18               | 6 | 0 | -0.056758 | -0.025219 | 1.728085  |
| 19               | 1 | 0 | -1.423587 | 0.261105  | 2.773676  |
| 20               | 8 | 0 | -0.422110 | -0.069870 | 3.237781  |
| 21               | 1 | 0 | -0.384849 | -0.967433 | 3.607366  |
| 22               | 6 | 0 | 1.339195  | 0.476634  | 1.531181  |
| 23               | 6 | 0 | 1.950080  | 1.464148  | 2.307487  |
| 24               | 6 | 0 | 2.082192  | -0.105159 | 0.502918  |
| 25               | 6 | 0 | 3.253612  | 1.858773  | 2.052693  |
| 26               | 1 | 0 | 1.386922  | 1.930141  | 3.104934  |
| 27               | 6 | 0 | 3.379190  | 0.296607  | 0.221552  |
| 28               | 1 | 0 | 1.636222  | -0.890154 | -0.105012 |
| 29               | 6 | 0 | 3.996231  | 1.303281  | 0.989869  |
| 30               | 1 | 0 | 3.692578  | 2.619686  | 2.685456  |
| 31               | 1 | 0 | 3.910906  | -0.183993 | -0.589623 |
| 32               | 1 | 0 | -0.096106 | -1.064105 | 1.400845  |
| 33               | 7 | 0 | 5.281438  | 1.729211  | 0.713402  |
| 34               | 6 | 0 | 6.075797  | 0.989969  | -0.243099 |
| 35               | 1 | 0 | 7.055806  | 1.458968  | -0.330660 |
| 36               | 1 | 0 | 6.218047  | -0.061334 | 0.047794  |
| 37               | 1 | 0 | 5.609701  | 1.008183  | -1.234006 |
| 38               | 6 | 0 | 5.951309  | 2.602460  | 1.653352  |
| 39               | 1 | 0 | 6.951581  | 2.824392  | 1.281399  |
| 40               | 1 | 0 | 5.415685  | 3.552079  | 1.753438  |
| 41               | 1 | 0 | 6.043271  | 2.155057  | 2.653734  |
| <b>3j (3_4):</b> |   |   |           |           |           |
| 1                | 6 | 0 | -0.314595 | -0.740199 | -0.748355 |
| 2                | 6 | 0 | 1.112721  | -0.804922 | -0.690063 |
| 3                | 6 | 0 | 1.745303  | -1.607087 | -1.679908 |
| 4                | 6 | 0 | 3.151542  | -1.450735 | -1.912422 |
| 5                | 1 | 0 | 3.570896  | -1.990374 | -2.753901 |
| 6                | 8 | 0 | 1.135299  | -2.473342 | -2.438483 |
| 7                | 1 | 0 | -0.727524 | -1.263481 | -1.603978 |
| 8                | 6 | 0 | -1.589140 | -3.208836 | -0.735293 |
| 9                | 6 | 0 | -0.906175 | -2.638900 | 0.386649  |
| 10               | 1 | 0 | 0.163036  | -2.798682 | 0.450586  |
| 11               | 8 | 0 | -1.019977 | -3.440494 | -1.849017 |
| 12               | 1 | 0 | 0.194943  | -2.885447 | -2.109424 |
| 13               | 6 | 0 | 1.953211  | -0.156452 | 0.302119  |
| 14               | 6 | 0 | 3.353637  | -0.079666 | 0.085343  |
| 15               | 6 | 0 | 3.913353  | -0.699647 | -1.077777 |
| 16               | 1 | 0 | 4.982380  | -0.603986 | -1.249591 |
| 17               | 6 | 0 | 1.454074  | 0.342291  | 1.529167  |
| 18               | 1 | 0 | 0.396981  | 0.250574  | 1.750000  |
| 19               | 6 | 0 | 4.186592  | 0.548463  | 1.036020  |

|                  |   |   |           |           |           |
|------------------|---|---|-----------|-----------|-----------|
| 20               | 1 | 0 | 5.252824  | 0.604412  | 0.833562  |
| 21               | 6 | 0 | -1.161312 | 0.373125  | -0.312210 |
| 22               | 6 | 0 | -0.679293 | 1.677973  | -0.113367 |
| 23               | 6 | 0 | -2.552563 | 0.192546  | -0.246032 |
| 24               | 6 | 0 | -1.527015 | 2.729788  | 0.177134  |
| 25               | 6 | 0 | -3.413657 | 1.225713  | 0.066870  |
| 26               | 1 | 0 | -2.963478 | -0.793076 | -0.440145 |
| 27               | 6 | 0 | -2.920164 | 2.528036  | 0.304097  |
| 28               | 1 | 0 | -1.103972 | 3.719405  | 0.293950  |
| 29               | 1 | 0 | -4.475170 | 1.020689  | 0.122743  |
| 30               | 6 | 0 | -1.614678 | -2.374438 | 1.610213  |
| 31               | 6 | 0 | -3.017463 | -3.439064 | -0.614349 |
| 32               | 1 | 0 | -3.515515 | -3.870241 | -1.476106 |
| 33               | 6 | 0 | -3.018476 | -2.561315 | 1.668573  |
| 34               | 6 | 0 | -3.685175 | -3.124239 | 0.523414  |
| 35               | 1 | 0 | -4.756799 | -3.298242 | 0.592266  |
| 36               | 6 | 0 | 2.290007  | 0.929430  | 2.455213  |
| 37               | 1 | 0 | 1.875303  | 1.293070  | 3.390180  |
| 38               | 6 | 0 | 3.668462  | 1.054726  | 2.205519  |
| 39               | 1 | 0 | 4.316232  | 1.526414  | 2.936605  |
| 40               | 6 | 0 | -3.719246 | -2.242589 | 2.847404  |
| 41               | 6 | 0 | -3.053455 | -1.764342 | 3.956730  |
| 42               | 6 | 0 | -0.951919 | -1.915134 | 2.768233  |
| 43               | 6 | 0 | -1.656450 | -1.611646 | 3.915418  |
| 44               | 1 | 0 | 0.128851  | -1.803950 | 2.743356  |
| 45               | 1 | 0 | -1.127070 | -1.258118 | 4.794724  |
| 46               | 1 | 0 | -3.600496 | -1.520178 | 4.861144  |
| 47               | 1 | 0 | -4.796213 | -2.388585 | 2.871691  |
| 48               | 1 | 0 | 0.379703  | 1.881784  | -0.223640 |
| 49               | 7 | 0 | -3.761976 | 3.560186  | 0.632015  |
| 50               | 6 | 0 | -3.234799 | 4.900669  | 0.776615  |
| 51               | 1 | 0 | -2.469716 | 4.940886  | 1.560004  |
| 52               | 1 | 0 | -2.789819 | 5.272797  | -0.155897 |
| 53               | 1 | 0 | -4.043191 | 5.572870  | 1.062256  |
| 54               | 6 | 0 | -5.193568 | 3.343977  | 0.641512  |
| 55               | 1 | 0 | -5.692020 | 4.269960  | 0.926193  |
| 56               | 1 | 0 | -5.570286 | 3.037816  | -0.343333 |
| 57               | 1 | 0 | -5.471853 | 2.572839  | 1.368796  |
|                  |   |   |           |           |           |
| <b>3j (4_5):</b> |   |   |           |           |           |
| 1                | 8 | 0 | 0.478410  | -3.452457 | -0.693336 |
| 2                | 6 | 0 | -0.482668 | -0.167529 | 0.510457  |
| 3                | 6 | 0 | -2.074051 | -1.600002 | -0.780127 |
| 4                | 6 | 0 | -3.358974 | -2.140406 | -1.048668 |
| 5                | 6 | 0 | -1.883641 | -0.631174 | 0.183295  |
| 6                | 6 | 0 | -4.447601 | -1.675468 | -0.368331 |
| 7                | 6 | 0 | -3.025404 | -0.088960 | 0.852205  |

|    |   |   |           |           |           |
|----|---|---|-----------|-----------|-----------|
| 8  | 6 | 0 | -4.316537 | -0.631388 | 0.585914  |
| 9  | 6 | 0 | 2.636630  | -0.837780 | -1.244323 |
| 10 | 6 | 0 | 2.842515  | -0.515542 | 0.171192  |
| 11 | 6 | 0 | 1.612499  | -1.593692 | -1.663471 |
| 12 | 6 | 0 | 4.012029  | 0.110212  | 0.607381  |
| 13 | 6 | 0 | 1.851216  | -0.859844 | 1.104352  |
| 14 | 6 | 0 | 0.697059  | -2.169445 | -0.663172 |
| 15 | 6 | 0 | 4.205100  | 0.386544  | 1.956507  |
| 16 | 1 | 0 | 4.771491  | 0.380300  | -0.121094 |
| 17 | 6 | 0 | 2.053914  | -0.587117 | 2.452882  |
| 18 | 6 | 0 | 0.518813  | -1.388632 | 0.617485  |
| 19 | 6 | 0 | 3.227659  | 0.030175  | 2.882328  |
| 20 | 1 | 0 | 5.117643  | 0.871893  | 2.286181  |
| 21 | 1 | 0 | 1.284812  | -0.857694 | 3.172336  |
| 22 | 1 | 0 | 3.377667  | 0.230591  | 3.938144  |
| 23 | 1 | 0 | 3.383580  | -0.486763 | -1.951846 |
| 24 | 1 | 0 | 1.496967  | -1.918192 | -2.691164 |
| 25 | 6 | 0 | -2.937332 | 0.995044  | 1.769380  |
| 26 | 6 | 0 | -4.053589 | 1.481758  | 2.402106  |
| 27 | 1 | 0 | -1.979203 | 1.471718  | 1.946525  |
| 28 | 6 | 0 | -5.326168 | 0.916802  | 2.159666  |
| 29 | 1 | 0 | -3.959671 | 2.315840  | 3.090324  |
| 30 | 6 | 0 | -5.448713 | -0.113968 | 1.264589  |
| 31 | 1 | 0 | -6.199197 | 1.307859  | 2.671399  |
| 32 | 1 | 0 | -6.421304 | -0.550318 | 1.052795  |
| 33 | 1 | 0 | -3.442292 | -2.915179 | -1.803481 |
| 34 | 1 | 0 | -5.434455 | -2.086448 | -0.562203 |
| 35 | 8 | 0 | -1.021601 | -2.042684 | -1.513655 |
| 36 | 1 | 0 | 0.093528  | -2.083204 | 1.348805  |
| 37 | 1 | 0 | -0.489426 | 0.203375  | 1.540020  |
| 38 | 1 | 0 | -0.550431 | -3.151009 | -1.224659 |
| 39 | 6 | 0 | -0.000616 | 0.973778  | -0.368379 |
| 40 | 6 | 0 | 0.826571  | 1.967339  | 0.158208  |
| 41 | 6 | 0 | -0.347787 | 1.078926  | -1.716885 |
| 42 | 6 | 0 | 1.309923  | 3.010698  | -0.620046 |
| 43 | 6 | 0 | 0.124156  | 2.114316  | -2.510560 |
| 44 | 1 | 0 | -0.998135 | 0.332811  | -2.163256 |
| 45 | 6 | 0 | 0.979926  | 3.101937  | -1.985067 |
| 46 | 1 | 0 | 1.941022  | 3.756677  | -0.153686 |
| 47 | 1 | 0 | -0.183924 | 2.151645  | -3.547878 |
| 48 | 1 | 0 | 1.112897  | 1.923066  | 1.207472  |
| 49 | 7 | 0 | 1.479976  | 4.123207  | -2.783096 |
| 50 | 6 | 0 | 0.873777  | 4.339099  | -4.080867 |
| 51 | 1 | 0 | -0.206409 | 4.539406  | -4.019248 |
| 52 | 1 | 0 | 1.357933  | 5.189622  | -4.561552 |
| 53 | 1 | 0 | 1.021875  | 3.468299  | -4.726698 |
| 54 | 6 | 0 | 2.096271  | 5.261044  | -2.133262 |

|                  |   |   |           |           |           |
|------------------|---|---|-----------|-----------|-----------|
| 55               | 1 | 0 | 2.992347  | 4.954705  | -1.584742 |
| 56               | 1 | 0 | 2.406713  | 5.978894  | -2.892982 |
| 57               | 1 | 0 | 1.420249  | 5.767599  | -1.427884 |
|                  |   |   |           |           |           |
| <b>3j (5_6):</b> |   |   |           |           |           |
| 1                | 8 | 0 | -0.480712 | 7.273487  | -4.991108 |
| 2                | 6 | 0 | 1.816779  | 7.957089  | -6.549681 |
| 3                | 6 | 0 | 2.857589  | 8.490690  | -5.571642 |
| 4                | 6 | 0 | 4.091347  | 8.968842  | -6.002060 |
| 5                | 6 | 0 | 2.609833  | 8.497372  | -4.197624 |
| 6                | 6 | 0 | 5.045930  | 9.447438  | -5.111478 |
| 7                | 6 | 0 | 3.545983  | 8.970797  | -3.292349 |
| 8                | 1 | 0 | 1.663736  | 8.112495  | -3.822402 |
| 9                | 6 | 0 | 4.788961  | 9.472826  | -3.729799 |
| 10               | 1 | 0 | 5.993894  | 9.795508  | -5.501863 |
| 11               | 1 | 0 | 3.306535  | 8.945318  | -2.236708 |
| 12               | 6 | 0 | 0.276638  | 6.236580  | -5.449560 |
| 13               | 6 | 0 | 0.255117  | 5.098740  | -4.546533 |
| 14               | 6 | 0 | 1.451331  | 6.491555  | -6.297411 |
| 15               | 6 | 0 | 1.253292  | 4.197326  | -4.584754 |
| 16               | 6 | 0 | 2.528192  | 5.499827  | -6.248634 |
| 17               | 6 | 0 | 2.401899  | 4.337758  | -5.451800 |
| 18               | 6 | 0 | -1.788198 | 10.376537 | -6.296719 |
| 19               | 6 | 0 | -0.723260 | 10.837119 | -7.116487 |
| 20               | 6 | 0 | -1.679177 | 9.198325  | -5.615256 |
| 21               | 6 | 0 | -0.824490 | 12.062354 | -7.823371 |
| 22               | 6 | 0 | 0.467421  | 10.060957 | -7.221632 |
| 23               | 6 | 0 | -0.495684 | 8.436305  | -5.739164 |
| 24               | 6 | 0 | 0.211009  | 12.516696 | -8.597525 |
| 25               | 1 | 0 | -1.742861 | 12.636235 | -7.734470 |
| 26               | 6 | 0 | 1.525960  | 10.567340 | -8.022519 |
| 27               | 6 | 0 | 0.566765  | 8.818010  | -6.519009 |
| 28               | 6 | 0 | 1.400393  | 11.759263 | -8.690739 |
| 29               | 1 | 0 | 0.124704  | 13.456257 | -9.133058 |
| 30               | 1 | 0 | 2.454332  | 10.013403 | -8.093437 |
| 31               | 1 | 0 | 2.224297  | 12.127010 | -9.293755 |
| 32               | 1 | 0 | -2.689414 | 10.977401 | -6.218978 |
| 33               | 1 | 0 | -2.470509 | 8.820151  | -4.977520 |
| 34               | 1 | 0 | 2.245708  | 8.024538  | -7.555634 |
| 35               | 6 | 0 | 3.702156  | 5.647271  | -7.010253 |
| 36               | 6 | 0 | 4.687538  | 4.676105  | -7.004645 |
| 37               | 1 | 0 | 3.836900  | 6.534604  | -7.619695 |
| 38               | 6 | 0 | 4.546626  | 3.517843  | -6.230121 |
| 39               | 1 | 0 | 5.579224  | 4.817125  | -7.607689 |
| 40               | 6 | 0 | 3.411637  | 3.361145  | -5.458950 |
| 41               | 1 | 0 | 5.321341  | 2.758829  | -6.231231 |
| 42               | 1 | 0 | 3.285557  | 2.477233  | -4.838787 |



|    |   |   |           |           |           |
|----|---|---|-----------|-----------|-----------|
| 43 | 1 | 0 | -0.588948 | 5.018940  | -3.871360 |
| 44 | 1 | 0 | 1.223574  | 3.335086  | -3.923141 |
| 45 | 8 | 0 | -0.673307 | 5.661388  | -6.874836 |
| 46 | 1 | 0 | -1.421149 | 6.239145  | -7.100385 |
| 47 | 1 | 0 | 0.484187  | 6.072486  | -7.185605 |
| 48 | 1 | 0 | 4.330709  | 8.958378  | -7.064173 |
| 49 | 7 | 0 | 5.719604  | 9.976631  | -2.829298 |
| 50 | 6 | 0 | 7.071626  | 10.199422 | -3.296141 |
| 51 | 1 | 0 | 7.678119  | 10.565283 | -2.467193 |
| 52 | 1 | 0 | 7.540190  | 9.288111  | -3.697906 |
| 53 | 1 | 0 | 7.089130  | 10.964376 | -4.078718 |
| 54 | 6 | 0 | 5.531640  | 9.699727  | -1.420326 |
| 55 | 1 | 0 | 6.360350  | 10.133638 | -0.860141 |
| 56 | 1 | 0 | 4.610055  | 10.162598 | -1.054338 |
| 57 | 1 | 0 | 5.485359  | 8.622730  | -1.199122 |
|    |   |   |           |           |           |
